# Supplementary material for: Critical appraisal and issues regarding generalisability of comparative effectiveness studies of NOACs in atrial fibrillation and their relation to clinical trial data: a systematic review
Source: PubMed Central journal article supplement — BMJ Open. 2021 Feb 1;11(2):e042024. doi: 10.1136/bmjopen-2020-042024 (PMC7852966; doi:10.1136/bmjopen-2020-042024), 2021-02-01
Supplement: bmjopen-2020-042024.draft_revisions.pdf [file bmjopen-2020-042024.draft_revisions.pdf]

# BMJ Open

BMJ Open is committed to open peer review. As part of this commitment we make the peer review history of every article we publish publicly available.

When an article is published we post the peer reviewers' comments and the authors' responses online. We also post the versions of the paper that were used during peer review. These are the versions that the peer review comments apply to.

The versions of the paper that follow are the versions that were submitted during the peer review process. They are not the versions of record or the final published versions. They should not be cited or distributed as the published version of this manuscript.

BMJ Open is an open access journal and the full, final, typeset and author-corrected version of record of the manuscript is available on our site with no access controls, subscription charges or pay-per-view fees (<http://bmjopen.bmj.com>).

If you have any questions on BMJ Open's open peer review process please email [info.bmjopen@bmj.com](mailto:info.bmjopen@bmj.com)

# BMJ Open

## CRITICAL APPRAISAL AND ISSUES REGARDING GENERALISABILITY OF COMPARATIVE EFFECTIVENESS STUDIES OF NOACS IN ATRIAL FIBRILLATION AND THEIR RELATION TO CLINICAL TRIAL DATA - A SYSTEMATIC REVIEW

|                               |                                                                                                                                                                                                                                                                                                 |
|-------------------------------|-------------------------------------------------------------------------------------------------------------------------------------------------------------------------------------------------------------------------------------------------------------------------------------------------|
| Journal:                      | <i>BMJ Open</i>                                                                                                                                                                                                                                                                                 |
| Manuscript ID                 | bmjopen-2020-042024                                                                                                                                                                                                                                                                             |
| Article Type:                 | Original research                                                                                                                                                                                                                                                                               |
| Date Submitted by the Author: | 24-Jun-2020                                                                                                                                                                                                                                                                                     |
| Complete List of Authors:     | Bunge, Eveline; Pallas health research and consultancy van Hout, Ben; University of Sheffield, HEDS, SchARR Haas, Sylvia ; Formerly Technical University Of Munich Spentzouris, Georgios; Daiichi Sankyo Europe GmbH Cohen, Alexander; Guys and St Thomas' NHS Foundation Trust, King's College |
| Keywords:                     | Adult cardiology < CARDIOLOGY, STATISTICS & RESEARCH METHODS, Cardiology < INTERNAL MEDICINE                                                                                                                                                                                                    |
|                               |                                                                                                                                                                                                                                                                                                 |

SCHOLARONE™  
Manuscripts

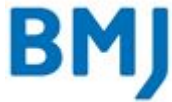

I, the Submitting Author has the right to grant and does grant on behalf of all authors of the Work (as defined in the below author licence), an exclusive licence and/or a non-exclusive licence for contributions from authors who are: i) UK Crown employees; ii) where BMJ has agreed a CC-BY licence shall apply, and/or iii) in accordance with the terms applicable for US Federal Government officers or employees acting as part of their official duties; on a worldwide, perpetual, irrevocable, royalty-free basis to BMJ Publishing Group Ltd ("BMJ") its licensees and where the relevant Journal is co-owned by BMJ to the co-owners of the Journal, to publish the Work in this journal and any other BMJ products and to exploit all rights, as set out in our [licence](#).

The Submitting Author accepts and understands that any supply made under these terms is made by BMJ to the Submitting Author unless you are acting as an employee on behalf of your employer or a postgraduate student of an affiliated institution which is paying any applicable article publishing charge ("APC") for Open Access articles. Where the Submitting Author wishes to make the Work available on an Open Access basis (and intends to pay the relevant APC), the terms of reuse of such Open Access shall be governed by a Creative Commons licence – details of these licences and which [Creative Commons](#) licence will apply to this Work are set out in our licence referred to above.

Other than as permitted in any relevant BMJ Author's Self Archiving Policies, I confirm this Work has not been accepted for publication elsewhere, is not being considered for publication elsewhere and does not duplicate material already published. I confirm all authors consent to publication of this Work and authorise the granting of this licence.

1  
2  
3 **CRITICAL APPRAISAL AND ISSUES REGARDING GENERALISABILITY OF COMPARATIVE**  
4 **EFFECTIVENESS STUDIES OF NOACS IN ATRIAL FIBRILLATION AND THEIR RELATION TO CLINICAL**  
5 **TRIAL DATA - A SYSTEMATIC REVIEW**  
6  
7  
8  
9

10 **Eveline M. Bunge<sup>1</sup>, Ben van Hout<sup>2</sup>, Sylvia Haas<sup>3</sup>, Georgios Spentzouris<sup>4</sup>, Alexander T. Cohen<sup>5</sup>**  
11

12  
13 <sup>1</sup> Pallas, health research and consultancy BV, P.O. Box 21238, 3001 AE Rotterdam, the Netherlands  
14

15  
16 <sup>2</sup> University of Sheffield, HEDS, ScHARR, Sheffield, UK  
17

18  
19 <sup>3</sup> Formerly Technical University of Munich, Munich, Germany  
20

21  
22 <sup>4</sup> Daiichi Sankyo Europe, Munich, Germany  
23

24  
25 <sup>5</sup> Guys and St Thomas' NHS Foundation Trust, King's College London, London, UK  
26

27 \* Corresponding author:  
28

29 bunge@pallashrc.com  
30

31 Word count: 4196  
32  
33  
34  
35  
36  
37  
38  
39  
40  
41  
42  
43  
44  
45  
46  
47  
48  
49  
50  
51  
52  
53  
54  
55  
56  
57  
58  
59  
60

1  
2  
3  
4  
5  
6  
7  
8  
9  
10  
11  
12  
13  
14  
15  
16  
17  
18  
19  
20  
21  
22  
23  
24  
25  
26  
27  
28  
29  
30  
31  
32  
33  
34  
35  
36  
37  
38  
39  
40  
41  
42  
43  
44  
45  
46  
47  
48  
49  
50  
51  
52  
53  
54  
55  
56  
57  
58  
59  
60

**KEY WORDS**

atrial fibrillation; non-vitamin K antagonist oral anticoagulants (NOAC); comparative effectiveness research;  
systematic review

For peer review only

**ABSTRACT**

**Objective:** To critically appraise the published comparative effectiveness studies on non-vitamin K antagonist oral anticoagulants (NOAC) in nonvalvular atrial fibrillation (NVAf).

**Materials and Methods:** We performed a systematic literature review in Medline and EMBase to investigate the way comparisons were made. Results were also compared with expectations formulated on the basis of trial results with specific attention to the patient years in each study.

**Results:** We included 39 studies in which direct comparison between at least two NOACs were made. Almost all studies concerned patient registries, pharmacy or prescription databases and/or health insurance database studies using a cohort design. Corrections for differences in patient characteristics was applied in all but two studies. Eighteen studies matched using propensity scores, eight studies weighted patients based on the inverse probability of treatment, one study used propensity score stratification and ten studies applied a proportional hazards model. These studies have some important limitations, even though the larger part of the studies were well conducted technically. On the basis of trial results, expected differences are small and a naïve analysis suggests trials with between 7,700 and 59,500 patients are needed to confirm the observed differences in bleedings and between 51,800 and 7,994,300 to confirm differences in efficacy.

**Conclusion:** Meaningful comparisons between NOACs on the basis of observational data, even after correction for baseline characteristics, may not be reliable due to unmeasured confounders, channelling bias and insufficient sample size. These limitations should be kept in mind when results of these studies are used to decide on NOAC treatment options.

**STRENGTHS AND LIMITATIONS OF THIS STUDY**

- To our knowledge, this is the first systematic review that critically appraised the quality and generalisability of the comparative effectiveness studies on NOACs in atrial fibrillation patients and to relate this to clinical trial data
- A naïve trial analysis was conducted to estimate the number of patients needed in a randomised clinical trial to confirm the differences in efficacy and bleeding.
- Thirty-nine articles were included of which only one included all four NOACs.

For peer review only

## INTRODUCTION

Guidelines state a preference for non-vitamin K antagonist oral anticoagulants (NOACs) above vitamin K antagonists (VKA) in patients with nonvalvular atrial fibrillation (NVAF) requiring prevention of stroke and systemic embolism.[1, 2] However, no recommendation for a specific NOAC is made in these guidelines, and in daily practice, physicians have to make a choice which of the four available NOACs (dabigatran, rivaroxaban, apixaban, edoxaban) they prescribe for a particular patient.[3-6]

In the absence of head-to-head trials, comparative effectiveness research (CER) has been conducted to compare the NOACs with regard to effectiveness and safety. This is also described as real-world evidence; i.e. the data will come from patients treated in daily practice. Comparisons on effectiveness and safety between NOACs are however not easy to make, as patients will not be prescribed one of the NOACs at random. The choice of a certain NOAC for a patient will at least partly be driven by patient characteristics, such as age, concomitant medications, and the risk of stroke and/or bleeding. This can lead to systematic differences between the treatment groups, which is known as channeling bias. [7] In order to make a valid comparison on effectiveness and safety between the NOACs, adjusting for these characteristics is necessary when these characteristics are also related to the outcome (confounding variables).

Several techniques exist to correct for imbalances in risks. Cox proportional hazards (Cox PH) regression model adjustment can be used but large sample sizes are needed when number of events is relatively low and the number of covariates is high (as a rule of thumb, about 10 events per predictor variable [8]) and these large sample sizes are not always available. Event rates are low, around 1 per 100 patient years for efficacy outcomes and to detect differences, even in a randomized clinical trial, one needs substantial numbers of patients. This number would only increase when the results are contaminated by a lack of balance between the patients groups. Another method to adjust for confounding is using propensity scores (PS) to create comparable patient groups before the analysis. A propensity score is the probability of an individual receiving a specific treatment given a specific set of patient characteristics (e.g. age, gender, comorbidities).[9] Variables related to the outcome should be included in the propensity score despite their strength of association on treatment (exposure) selection. This will increase the precision of the estimated exposure effect, while bias will not be increased. Variables that are related to the exposure but not the outcome will decrease the precision of the estimated exposure effect without decreasing bias.[10] Adjustment for confounding using PS can be done by matching the treatment groups on the PS, by weighing treatment groups based on the PS inverse probability of treatment weighting (IPTW), by PS stratification, or by covariate adjustment using the PS.[9, 11] Well conducted PS methods will lead to treatment groups that are very well comparable regarding important confounders, which increases the confidence in the results, however, there are also some disadvantages. For instance, in PS matching studies, patients who cannot



1  
2  
3 be matched to another patient will be excluded from the analyses, and in IPTW, when patients on one treatment  
4 have a low propensity score and patients treated with the other treatment have a high propensity score, extreme  
5 weights can occur which can bias the results.[12]  
6  
7  
8  
9

10 To gain more understanding in how the above described methodologies were applied in peer-reviewed CER on  
11 effectiveness and safety in NOACs in NVAF patients, we conducted a systematic literature review. Within this we  
12 compare the results with those from a naive analysis of the results of the four major trial for rivaroxaban  
13 (Rivaroxaban Once Daily Oral Direct Factor Xa Inhibition Compared with Vitamin K Antagonism for Prevention of  
14 Stroke and Embolism Trial in Atrial Fibrillation (ROCKET AF)), apixaban (Apixaban for Reduction in Stroke and  
15 Other Thromboembolic Events in Atrial Fibrillation (ARISTOTLE)), dabigatran (Randomized Evaluation of Long-  
16 Term Anticoagulation Therapy (RE-LY)) and edoxaban (Effective Anticoagulation with Factor Xa Next Generation  
17 in Atrial Fibrillation–Thrombolysis in Myocardial Infarction 48 (ENGAGE AF)) and compare the results from the  
18 various analyses with those from the trials.  
19  
20  
21  
22  
23  
24  
25  
26  
27  
28  
29  
30  
31  
32  
33  
34  
35  
36  
37  
38  
39  
40  
41  
42  
43  
44  
45  
46  
47  
48  
49  
50  
51  
52  
53  
54  
55  
56  
57  
58  
59  
60

## METHODS

### Information sources, search strategy and eligibility criteria

We performed a systematic literature review to identify peer-reviewed comparative effectiveness research on NOACs in patients with atrial fibrillation. A search in Medline (access through PubMed) and EMBase was performed combining search strings on NOAC, VKA and atrial fibrillation (see appendix 1 for the search strings). The search was conducted on 23-04-2019 and we checked all articles published in English language. The title and abstract selection was done in duplicate by two independent researchers.

The following inclusion criteria were used:

- Population: patients with NVAF
- Intervention: NOAC (dabigatran, rivaroxaban, apixaban or edoxaban)
- Comparator: other NOAC(s) (dabigatran, rivaroxaban, apixaban and/or edoxaban)
- Outcomes: effectiveness and safety
- Study type: comparative effectiveness studies with a cohort design

The following exclusion criteria were applied:

- Studies on only one NOAC
- Studies in which VKA is the comparator for the NOACs, and NOACs are not compared against each other
- Studies on cost-effectiveness and healthcare resources use
- Studies on adherence or persistence

### Critical appraisal

We checked the setting, in- and exclusion criteria and the following baseline characteristics: age, proportion males, CHA2DS2Vasc score and comorbidity index.

We used the criteria suggested by ISPOR, Yao et al., and Austin et al. as a guidance to critically appraise the articles in which PS were used.[12-15] The criteria we checked concerned:

- The variables included in the propensity score model
- Explanation of the variable selection procedure for propensity score model
- Distribution of baseline characteristics for each group before propensity score analysis
- In case of PSM:
  - matching ratio,
  - distance metric,

- 1
- 2
- 3
  - with or without replacement,
- 4
  - comparability of baseline characteristics in the matched groups,
- 5
  - sample size before and after matching
- 6
- 7
- 8
  - In case of IPTW:
- 9
  - comparability of baseline characteristics in the weighted groups
- 10
  - extreme weights
- 11
- 12
- 13
  - In case of PS stratification:
- 14
  - number of strata, comparability of baseline characteristics
- 15
- 16

17 In case of analyses in which no PS was used in the main analyses, we evaluated whether the ratio number of  
18 covariates to the number of events seemed sufficient to produce valid results.[8]  
19  
20

### 21 22 23 **Naïve trial analysis**

24 Trials are quite often designed with a null hypothesis and associated with a power calculation while real world  
25 studies are often dictated by the number of observations available. To give the results from the real-world-  
26 evidence some perspective we undertook a naïve trial analysis in which the risk reductions from each trial with  
27 respect to efficacy and safety outcomes were applied to an average number of outcomes observed in the warfarin  
28 arms in each trial. This leads to an estimate of the relevant rates for each drug and the differences are illustrated  
29 by the number of patients (sample size) needed in a randomised clinical trial to confirm the estimated differences.  
30  
31  
32  
33  
34  
35  
36  
37  
38  
39  
40  
41  
42  
43  
44  
45  
46  
47  
48  
49  
50  
51  
52  
53  
54  
55  
56  
57  
58  
59  
60

**RESULTS**

In total, we found 1302 unique articles in our search, of which 39 articles fulfilled the in- and exclusion criteria and were included for data extraction, see figure 1. In table 1 to 5, study characteristics are presented. The most important differences between the studies are outlined in table 6.

For peer review only

**Table 1. Characteristics of the included articles that used propensity score matching (PSM) as primary analyses (n=18)**

| Author and country                          | Setting and study period                                                                             | Study population                                                                                                                                                                                                | Patient characteristics before PSM (range between NOACs)                              | Primary outcome definition                                                                                                                                                                                                                                                                                                                                           | PSM details                                                                                                                                                                                          | Sample size before matching                                         | Sample size after matching                                                                                                                                               | Results/conclusion as reported in the article                                                                                                                                                                                                                    |
|---------------------------------------------|------------------------------------------------------------------------------------------------------|-----------------------------------------------------------------------------------------------------------------------------------------------------------------------------------------------------------------|---------------------------------------------------------------------------------------|----------------------------------------------------------------------------------------------------------------------------------------------------------------------------------------------------------------------------------------------------------------------------------------------------------------------------------------------------------------------|------------------------------------------------------------------------------------------------------------------------------------------------------------------------------------------------------|---------------------------------------------------------------------|--------------------------------------------------------------------------------------------------------------------------------------------------------------------------|------------------------------------------------------------------------------------------------------------------------------------------------------------------------------------------------------------------------------------------------------------------|
| Abraham, 2017<br>USA                        | OptumLabs Data Warehouse<br>Oct 1, 2010 through Feb 28, 2015                                         | NVAF patients, 18 years of age or older, identified by their index prescription of a NOAC during study period (excluded if NOAC prescribed during 12 months before index date). No reporting on earlier VKA use | Age: 69.2±11.6-72.2±11.1<br>Male: 54.0-60.5%<br>CHA2DS2-VASc: 3.2-4.0<br>CDI: 2.3-2.7 | Gastrointestinal bleeding: definition by Lewis et al. 2002 using inpatient hospital claims for relevant primary and secondary discharge diagnoses.                                                                                                                                                                                                                   | 3 matched cohorts; 1:1 PSM without replacement and with a caliper of 0.01; After PSM, standardized differences of all baseline characteristics were <10%.                                            | rivaroxaban: n=19,301<br>dabigatran: n=17,426<br>apixaban: n=6,576  | rivaroxaban vs. dabigatran: n=31,574<br>apixaban vs. rivaroxaban: n=13,130<br>apixaban vs. dabigatran: n=13,084<br><br>(more than 90% of original smallest samples size) | Apixaban had the most favorable gastrointestinal bleeding profile and rivaroxaban had the least favorable safety profile. Apixaban had the most favorable gastrointestinal safety profile among all age groups.                                                  |
| Amin, 2018 (J Manag Care Spec Pharm)<br>USA | Medicare & Medicaid Services<br>Jan 1, 2012, to Dec 31, 2014                                         | NVAF patients of at least 65 years old, OAC treatment-naïve, ≥ 1 prescription claim for OAC during study period. Excluded if OAC pharmacy claim during the 12-month before study start.                         | Age: 77.2±7.0-78.4±7.4<br>Male: 47.4-50.6%<br>CHA2DS2-VASc: 4.4-4.6<br>CCI: 2.5-2.7   | Hospitalization for stroke, systemic embolism and major bleeding: ICD-9-code as primary discharge diagnosis                                                                                                                                                                                                                                                          | 2 matched cohorts; 1:1 PSM with nearest neighbour without replacement and with a caliper of 0.01; After PSM, standardized differences of all baseline characteristics were <10%.                     | rivaroxaban: n=53,146<br>apixaban: n=20,853<br>dabigatran: n=16,743 | rivaroxaban vs. apixaban: n=41,608<br>dabigatran vs. apixaban: n=30,836<br><br>(more than 90% of original smallest samples size)                                         | Apixaban was associated with significantly lower risks of all-cause, stroke/SE-related, and MB-related hospitalizations compared with dabigatran, and rivaroxaban                                                                                                |
| Amin 2018 (J Med Econ)<br>USA               | OptumInsight research database<br>Jan 1, 2012 – Sept 30, 2015                                        | NVAF patients of at least 18 years old, OAC treatment-naïve, ≥ 1 prescription claim for OAC during study period. Excluded if OAC pharmacy claim during the 12-month before study start.                         | NR                                                                                    | Hospitalization for stroke, systemic embolism and major bleeding: ICD-9-code as primary discharge diagnosis                                                                                                                                                                                                                                                          | 2 matched cohorts; 1:1 PSM with nearest neighbour without replacement and with a caliper of 0.01; After PSM, standardized differences of all baseline characteristics were <10%.                     | rivaroxaban: n=14,163<br>apixaban: n=8,652<br>dabigatran: n=3,684   | apixaban vs. rivaroxaban: N=16,880<br>apixaban vs. dabigatran: N=7,114<br><br>(more than 90% of original smallest samples size)                                          | Rivaroxaban patients were associated with a significantly higher risk of all-cause and major bleeding related hospitalisations and dabigatran patients were associated with a significantly higher risk of major bleeding hospitalisation compared with apixaban |
| Andersen, 2018<br>Denmark                   | National patient register, Register of Medicinal Product Statistics<br>July 1, 2013 – March 31, 2016 | NVAF patients who were new users of NOAC aged 45 years of age or older, with a recent diagnosis of NVAF (received no OAC treatment in the 12 months before inclusion; 'recent diagnosis' is not defined)        | Online material not available                                                         | Stroke, systemic embolism and major bleeding (i.e. intracranial bleeding, gastrointestinal bleeding (bleeding ulcer, hematemesis or melena) or other serious bleeding (anemia caused by bleeding, bleeding of unknown origin, bleeding of the respiratory or urinary tract, peritoneal, retinal or orbital bleeding): hospital admission with a primary or secondary | 3 matched cohorts; 1:1 PSM with nearest neighbour with a caliper of 0. (replacement yes or no not reported) All baseline characteristics were well balanced after matching, except for calendar year | apixaban: n=4,292<br>dabigatran: n=3,913<br>rivaroxaban: n=3,805    | apixaban vs. rivaroxaban: N=7,352<br>apixaban vs. dabigatran: N=6,470<br>rivaroxaban vs. dabigatran: N=5,440                                                             | There were no statistically significant differences in risk of stroke or systemic embolism or major bleeding in propensity-matched comparisons between apixaban, dabigatran, and rivaroxaban used in standard doses.                                             |

| Author and country       | Setting and study period                                                                                    | Study population                                                                                                                                                      | Patient characteristics before PSM (range between NOACs)                                                  | Primary outcome definition                                                                                                                                                                                                                                                                      | PSM details                                                                                                                                                                            | Sample size before matching                                        | Sample size after matching                                              | Results/conclusion as reported in the article                                                                                                                                                                                                                                                        |
|--------------------------|-------------------------------------------------------------------------------------------------------------|-----------------------------------------------------------------------------------------------------------------------------------------------------------------------|-----------------------------------------------------------------------------------------------------------|-------------------------------------------------------------------------------------------------------------------------------------------------------------------------------------------------------------------------------------------------------------------------------------------------|----------------------------------------------------------------------------------------------------------------------------------------------------------------------------------------|--------------------------------------------------------------------|-------------------------------------------------------------------------|------------------------------------------------------------------------------------------------------------------------------------------------------------------------------------------------------------------------------------------------------------------------------------------------------|
| Blin, 2019<br>France     | French nationwide claims and hospitalization database, Système National des Données de Santé<br>2013 – 2015 | NVAF patients of at least 18 years old, all new users of standard or reduced doses of NOAC in (received no OAC treatment in the three years before the index date)    | Age: 65.3±10.2-69.0±11.1<br>Male: 62.7-68.3%<br>Modified CHA2DS2-VASc ≥2: 57.1-67.4%<br>Comorbidities: NR | Hospitalization with a main diagnosis of ischemic stroke or systemic embolism or major bleeding and all-cause death. (ICD-10) codes                                                                                                                                                             | 1 matched cohort PSM method not reported. After PSM, standardized differences of all baseline characteristics were <10%.                                                               | rivaroxaban: n=18,829<br>dabigatran: n=10,847                      | dabigatran vs. rivaroxaban: n=16,580                                    | Dabigatran had similar or better effectiveness than rivaroxaban but lower bleeding risk. Death rates were not different.                                                                                                                                                                             |
| Briasoulis, 2018<br>USA  | Medicare and Medicaid Services<br>Jan 1, 2010 - Dec 31, 2013                                                | NVAF patients newly diagnosed of ≥65 years old and initiated OAC treatment during study period                                                                        | Age: 75.4±6–75.5±6<br>Male: 50-53%<br>CHA2DS2-VASc: 4.1-4.1<br>Gagne: 2.7-2.7                             | All-cause mortality, stroke, including ischemic stroke or transient ischemic attack, gastrointestinal bleeding, any bleeding, non-gastrointestinal bleeding, acute myocardial infarction. ICD-9-CM reported in inpatient claims, whether primary and secondary codes were used is not described | 1 matched cohort; 3-way propensity matching (VKA was one of the groups, but not further discussed here) After PSM, standardized differences of all baseline characteristics were <10%. | rivaroxaban: n=14,257<br>dabigatran: n=13,522                      | dabigatran vs. rivaroxaban: n =26,814                                   | Rivaroxaban was associated with higher gastrointestinal bleeding rates than dabigatran                                                                                                                                                                                                               |
| Deitelzweig, 2017<br>USA | Humana Research Database (Medicare coverage)<br>Jan 2013 - 30 Sept 2015                                     | NVAF patients age of ≥65 years, OAC treatment naïve (excluded if they had a pharmacy claim for OAC during the baseline period, which was 12 months before index date) | Age: 76.8±8.3-78.0±9.0<br>Male: 51.5-55.1%<br>CHA2DS2-VASc: 4.3- 4.6<br>CCI: 2.7-3.0                      | Hospitalisation claims of stroke, systemic embolism and major bleeding: ICD-9-code as primary discharge diagnosis                                                                                                                                                                               | 2 matched cohorts; 1:1 PSM with nearest neighbour (replacement yes or no and calliper not reported) balanced with key patient characteristics not statistically different (p>.05).     | rivaroxaban: n=11,082<br>apixaban: n=8,250<br>dabigatran: n=2,474  | apixaban vs. rivaroxaban: n=13,620<br>apixaban vs. dabigatran: n= 4,654 | Apixaban is associated with significantly lower risk of stroke/systemic embolism and major bleeding than rivaroxaban, and a trend towards better outcomes vs. dabigatran.                                                                                                                            |
| Gupta, 2018<br>USA       | Department of Defence data<br>Jan 1, 2012, to Sept 30, 2015                                                 | NVAF patients, treatment-naïve (excluded if a pharmacy claim for an OAC during the baseline period)                                                                   | NR                                                                                                        | Inpatient claim of stroke, systemic embolism or major bleeding as primary or secondary diagnosis based on validated administrative claims-based algorithms                                                                                                                                      | 2 matched cohorts; 1:1 PSM with nearest neighbour without replacement with a calliper of 0.01 After PSM, standardized differences of all baseline characteristics were <10%.           | rivaroxaban: n=15,680<br>apixaban: n=11,754<br>dabigatran: n=4,312 | rivaroxaban vs. apixaban: n=22,568<br>dabigatran vs. apixaban: n=8,258  | Rivaroxaban was associated with a significantly higher risk of stroke/systemic embolism and major bleeding compared with apixaban. Dabigatran use was associated with a numerically higher risk of stroke/systemic embolism and a significantly higher risk of major bleeding compared with apixaban |

| Author and country                | Setting and study period                                                                                                                                                                    | Study population                                                                                                                    | Patient characteristics before PSM (range between NOACs)                                     | Primary outcome definition                                                                                   | PSM details                                                                                                                                                                          | Sample size before matching                                             | Sample size after matching                                                                                 | Results/conclusion as reported in the article                                                                                                                                                                                                                               |
|-----------------------------------|---------------------------------------------------------------------------------------------------------------------------------------------------------------------------------------------|-------------------------------------------------------------------------------------------------------------------------------------|----------------------------------------------------------------------------------------------|--------------------------------------------------------------------------------------------------------------|--------------------------------------------------------------------------------------------------------------------------------------------------------------------------------------|-------------------------------------------------------------------------|------------------------------------------------------------------------------------------------------------|-----------------------------------------------------------------------------------------------------------------------------------------------------------------------------------------------------------------------------------------------------------------------------|
| Lai, 2017<br>Taiwan               | National Health Insurance program<br>2011 to 2014                                                                                                                                           | NVAF and flutter patients, ≥20 years, new-users (new users not further defined).                                                    | Age: 75.1±9.7-75.4±9.6<br>Male: 54-7-56.7%<br>CHA2DS2-VASc: 3.3-3.3<br>Comorbidity index: NR | All-cause death                                                                                              | 1 matched cohort;<br>1:1 PSM with calliper < 0.2 (neighbour and replacement not reported)<br>Balance checked with p-values and standardized difference                               | dabigatran: n=10,625;<br>rivaroxaban: n=4,609                           | dabigatran vs. rivaroxaban: N=9,200                                                                        | Rivaroxaban therapy was associated with a statistically significant increase in all-cause death compared with dabigatran                                                                                                                                                    |
| Lin, 2017<br>USA                  | IMS Pharmetrics Plus database<br>Jan 2013 – Sept 2015                                                                                                                                       | NVAF patients of at least 18 years old who initiated OAC (received no OAC treatment received 12 months before the index date)       | NR                                                                                           | Major bleeding first listed in ICD-9 diagnosis or procedure codes                                            | 2 cohorts;<br>1:1 PSM with nearest neighbour (replacement and calliper not reported)<br>Patient key characteristic being similar with p>0.05                                         | NR                                                                      | apixaban vs. rivaroxaban: N=8,124<br>apixaban vs. dabigatran: N=5,368                                      | Apixaban is associated with reduced risk of hospitalisation compared with dabigatran and rivaroxaban.                                                                                                                                                                       |
| Lip, 2016 (Thromb Haemost)<br>USA | Truven MarketScan® Commercial Claims and Encounter and Medicare Supplemental and Coordination of Benefits Databases<br>Jan 2012 to Dec 2014                                                 | NVAF patients ≥18 years who newly initiated OACs (patients with a prescription claim for OAC prior to the index date were excluded) | Age: 66.5±12.4- 68.5±12.4<br>Male: 61.4-65.0%<br>CHA2DS2-VASc: 2.6-2.8<br>CDI: 1.6-1.8       | Major bleeding listed first primary ICD-9 code                                                               | 3 cohorts;<br>1: 1 PSM with nearest neighbour without replacement with a maximum calliper of 0.01.<br>After PSM, standardized differences of all baseline characteristics were <10%. | rivaroxaban: n=17,801<br>apixaban: n=7,438<br>dabigatran: n=4,661       | apixaban vs dabigatran: n=14,798<br>rivaroxaban vs dabigatran: n=9,314<br>apixaban vs rivaroxaban: n=8,814 | Compared to apixaban, rivaroxaban initiation was associated with significantly higher risk of major bleeding. The difference for dabigatran was not statistically significant                                                                                               |
| Lip, 2018<br>USA                  | Medicare and Medicaid Services Medicare; Truven MarketScan, IMS PharMetrics Plus Database, Optum Clinformatics Data Mart, and the Humana Research Database<br>Jan 1, 2013, to Sept 30, 2015 | NVAF patients newly prescribed OAC, (received no OAC treatment in the 12 months before the index date)                              | Age: 71.4±11.4- 73.1±11.6<br>Male: 55.0-59.6%<br>CHA2DS2-VASc: 3.3-3.6<br>CDI: 2.4-2.8       | Hospitalizations with stroke, systemic embolism or major bleeding as the principal or first-listed diagnosis | 3 cohorts<br>1:1 PSM with nearest neighbour without replacement with a maximum calliper of 0.01<br>After PSM, standardized differences of all baseline characteristics were <10%     | rivaroxaban: n= 103,477<br>apixaban: n= 63,484<br>dabigatran: n= 27,571 | apixaban-rivaroxaban: n=125,238<br>dabigatran-rivaroxaban: n=55,076<br>apixaban-dabigatran: n=54,192       | Apixaban was associated with a lower rate of stroke/systemic embolism and major bleeding compared with dabigatran and rivaroxaban. Dabigatran was associated with a lower rate of major bleeding compared with rivaroxaban, with similar rates of stroke/systemic embolism. |

| Author and country      | Setting and study period                                                                                                               | Study population                                                                                                                                      | Patient characteristics before PSM (range between NOACs)                                                                                     | Primary outcome definition                                                                                                                                                                                                                                                                                                                                              | PSM details                                                                                                                                                         | Sample size before matching                                         | Sample size after matching                                                                                      | Results/conclusion as reported in the article                                                                                                                                                               |
|-------------------------|----------------------------------------------------------------------------------------------------------------------------------------|-------------------------------------------------------------------------------------------------------------------------------------------------------|----------------------------------------------------------------------------------------------------------------------------------------------|-------------------------------------------------------------------------------------------------------------------------------------------------------------------------------------------------------------------------------------------------------------------------------------------------------------------------------------------------------------------------|---------------------------------------------------------------------------------------------------------------------------------------------------------------------|---------------------------------------------------------------------|-----------------------------------------------------------------------------------------------------------------|-------------------------------------------------------------------------------------------------------------------------------------------------------------------------------------------------------------|
| Lutsey, 2018<br>USA     | MarketScan Commercial Database<br>Jan 1, 2010 through Sept 30, 2015                                                                    | NVAF patients aged 45 and older with at least one prescription for OAC after their first AF claim (de novo patients or first initiation of treatment) | Age: 69.1±11.4-69.9 ± 11.7<br>Male: 59.4-63.7<br>CHA2DS2-VASC: 3.3-3.6<br>Comorbidity index: NR                                              | venous thromboembolism: at least one inpatient ICD 9 claim (first listed or not is not specified)                                                                                                                                                                                                                                                                       | 3 cohorts<br>1:1 PSM with a maximum caliper of 0.25 (neighbour and replacement not reported)<br>Balance not described                                               | rivaroxaban: n=31,119<br>dabigatran: n=28,089<br>apixaban: n=17,112 | rivaroxaban vs. apixaban: n=32,468<br>dabigatran vs. rivaroxaban: n=21,160<br>dabigatran vs. apixaban: n=6,200  | Risk of VTE was lowest among those prescribed apixaban and dabigatran                                                                                                                                       |
| Mentias, 2018<br>USA    | Medicare & Medicaid Services<br>Jan 1, 2010, to Dec 31, 2013                                                                           | NVAF patients, newly diagnosed who initiated an OAC within 90 days of diagnosis                                                                       | Age: 75.8±6.4-75.8±6.4<br>Male: 48.9-50.1%<br>CHA2DS2-VASC: 4.3-4.3<br>Gagne: 3.0-3.0                                                        | inpatient admission for acute ischemic stroke or major bleeding as defined by Rothendler <sup>6</sup> and Suh based on the primary ICD-9-CM diagnosis on inpatient standard analytical files claims for acute care stays.                                                                                                                                               | 1 cohort<br>3-way PSM. (VKA was one of the groups, but not further discussed here)<br>After PSM, standardized differences of all baseline characteristics were <10% | rivaroxaban: n=23,177<br>dabigatran: n=21,979                       | NR                                                                                                              | Rivaroxaban users had significantly higher major bleeding risk compared with dabigatran users in the medium and high comorbidity groups                                                                     |
| Norby, 2017<br>USA      | Truven Health MarketScan Commercial Claims and Encounters Database and the Medicare Supplemental and Coordination of Benefits Database | NVAF patients with at least one prescription of NOAC after their first AF claim (first prescription of OAC)                                           | Age: 67.2±12.0-68.1±12.3<br>Male: 60.6-62.7<br>CHA2DS2-VASC: 2.6-2.9<br>Comorbidity index: NR                                                | ischemic stroke (primary discharge), intracranial bleeding (primary discharge), myocardial infarction (1st or 2 <sup>nd</sup> position of an inpatient discharge diagnosis, and gastrointestinal bleeding (primary and secondary diagnoses, presence of transfusion codes, and presence/absence of trauma codes to exclude trauma-related bleeding based on ICD-9 codes | 1 cohort;<br>1:1 PSM, greedy matching technique with a caliper of 0.25                                                                                              | NR                                                                  | rivaroxaban vs dabigatran: n=16,957                                                                             | Endpoint rates were similar when comparing anticoagulant-naïve rivaroxaban and dabigatran initiators, with the exception of higher gastrointestinal bleeding risk in rivaroxaban users                      |
| Noseworthy, 2016<br>USA | Optum Labs Data Warehouse<br>Oct 1, 2010 - Feb 28, 2015                                                                                | NVAF patients ≥ 18 years, who were OAC users during study period.                                                                                     | NR                                                                                                                                           | inpatient admission for stroke or systemic embolism or major bleeding (ICD-9 codes in the primary or secondary diagnosis positions of inpatient claims)                                                                                                                                                                                                                 | 3 cohorts;<br>1:1 PSM without replacement and with a caliper of 0.01.<br>A standardized difference < 10% was considered acceptable                                  | NR                                                                  | rivaroxaban vs. dabigatran: n=31,574<br>apixaban vs. rivaroxaban: n=13,130<br>apixaban vs. dabigatran: n=13,084 | Dabigatran, rivaroxaban, and apixaban appear to have similar effectiveness, although apixaban may be associated with a lower bleeding risk and rivaroxaban may be associated with an elevated bleeding risk |
| Shantha, 2017<br>USA    | Medicare and Medicaid<br>Nov 1, 2011 - Dec 31, 2013                                                                                    | Newly diagnosed NVAF patients and initiated OAC use.                                                                                                  | Males:<br>Age: 74.7±5.9-74.9±6.<br>CHADS2-Vasc: 3.7-3.8<br>Gagne score: 2.9-2.9<br>Women:<br>Age: 76.6±6.6- 76.9±6.6<br>CHADS2-Vasc: 4.8-4.9 | inpatient admissions for acute ischemic stroke or major bleeding (primary ICD-9-CM diagnosis on inpatient standard analytical files claims for acute care stays)                                                                                                                                                                                                        | 1 cohort;<br>Three-way PSM (VKA was one of the groups, but not further discussed here)                                                                              | rivaroxaban: n=23,177<br>dabigatran: n=21,979                       | dabigatran vs. rivaroxaban: n= 37,298                                                                           | The reduced risk of ischemic stroke in patients taking rivaroxaban, compared with dabigatran, seems to be limited to men, whereas the higher risk of                                                        |



| Author and country    | Setting and study period                                                                                                                                                                                      | Study population                                                                                                                                                        | Patient characteristics before PSM (range between NOACs)                             | Primary outcome definition                                                                                  | PSM details                                                                                                                                       | Sample size before matching | Sample size after matching                                               | Results/conclusion as reported in the article                                                                                                                                                                                                  |
|-----------------------|---------------------------------------------------------------------------------------------------------------------------------------------------------------------------------------------------------------|-------------------------------------------------------------------------------------------------------------------------------------------------------------------------|--------------------------------------------------------------------------------------|-------------------------------------------------------------------------------------------------------------|---------------------------------------------------------------------------------------------------------------------------------------------------|-----------------------------|--------------------------------------------------------------------------|------------------------------------------------------------------------------------------------------------------------------------------------------------------------------------------------------------------------------------------------|
|                       |                                                                                                                                                                                                               |                                                                                                                                                                         | Gagne: 3.0-3.1                                                                       |                                                                                                             | A standardized difference < 10% was considered acceptable                                                                                         |                             |                                                                          | bleeding seems to be limited to women                                                                                                                                                                                                          |
| Villines, 2019<br>USA | US Department of Defence Military Health System database<br><br>1 July 2010 to 30 June 2016 for the dabigatran vs. rivaroxaban cohort, and 28 Dec 2011 to 30 June 2016 for the dabigatran vs. apixaban cohort | NVAF patients ≥18 years newly initiated on standard-dose NOAC (first initiation of treatment, AF diagnosis in the 12 months before the index date or on the index date) | Age (mean): 70.9-71.3<br>Male: 60-62%<br>CHA2DS2-VASc: 3.1-3.1<br>CCI score: 4.3-4.3 | Stroke or major bleeding, ICD-9 or 10 codes, whether primary and secondary codes were used is not described | 2 cohorts<br>1:1 PSM nearest neighbour with a calliper of 0.20 (replacement not reported).<br>Balanced if the absolute value of the STD was ≤10%. | NR                          | dabigatran vs. rivaroxaban: n=25,526<br>dabigatran vs. apixaban: n=9,604 | Dabigatran was associated with significantly lower major bleeding risk vs. rivaroxaban, and no significant difference in stroke risk. For dabigatran vs. apixaban, the reduced sample size limited the ability to draw definitive conclusions. |

Age: mean, SD unless stated otherwise; CCI: Charlson comorbidity index; CDI: Charlson-Deyo index; Gagne: Gagne comorbidity score;

For peer review only

**Table 2. Characteristics of the included articles that used inverse probability of treatment weighting as primary analyses (n=8)**

| Author and country     | Setting and study period                                                            | Study population                                                                                                                                                                      | Patient characteristics (range between NOACs)                                                                                            | Primary outcome definition                                                                                                                                                                                                                                                           | IPWT details                                                                                  | Sample size                                                                                                            | Result/conclusion as reported in the article                                                                                                                                                                     |
|------------------------|-------------------------------------------------------------------------------------|---------------------------------------------------------------------------------------------------------------------------------------------------------------------------------------|------------------------------------------------------------------------------------------------------------------------------------------|--------------------------------------------------------------------------------------------------------------------------------------------------------------------------------------------------------------------------------------------------------------------------------------|-----------------------------------------------------------------------------------------------|------------------------------------------------------------------------------------------------------------------------|------------------------------------------------------------------------------------------------------------------------------------------------------------------------------------------------------------------|
| Adeboyeje, 2017<br>USA | HealthCore integrated research environment<br>Nov 1, 2009 - Jan 31, 2016            | NVAF patients newly prescribed OAC (no prescriptions for any anticoagulant in the 6-month period preceding their index dates).                                                        | Age (mean): 66-69<br>Male: 59.1-65.5%<br>CHA2DS2-VASc: 2.7-3.2<br>Comorbidity index: NR                                                  | Hospitalization for major bleeding (ICD 9-CM codes; whether primary and secondary codes were used is not described)                                                                                                                                                                  | Extreme weights: not reported.<br>Balanced if the absolute value of the STD was $\leq 10\%$ . | dabigatran: n=8,539<br>rivaroxaban: n=8,398<br>apixaban: n=3,689                                                       | Apixaban and dabigatran were associated with lower major bleeding risk compared with rivaroxaban; however, apixaban had a lower risk of major gastrointestinal bleeding than dabigatran.                         |
| Chan, 2018<br>Taiwan   | Taiwan National Health Insurance Research<br>June 1, 2012 - Dec 31, 2016            | NVAF patients with their first prescription of OAC                                                                                                                                    | Age: 75 $\pm$ 10- 76 $\pm$ 10<br>Male: 55-60%<br>CHA2DS2-VASc: 3.7-3.9<br>Comorbidity index: NR                                          | Hospitalization for ischemic stroke/systemic embolism, intracranial hemorrhage, major gastrointestinal bleeding, acute myocardial infarction, all major bleeding events, and all-cause mortality. ICD 9 and 10 codes, whether primary and secondary codes were used is not described | Extreme weights: not reported.<br>Balanced if the absolute value of the STD was $\leq 10\%$ . | rivaroxaban: n=27,777<br>dabigatran: n=20,079<br>apixaban: n=5,843                                                     | Three low-dose NOACs showed similar performance as without subgrouping                                                                                                                                           |
| Charlton, 2018<br>USA  | HealthCore Integrated Research Environment database<br>Nov 1, 2010 - March 31, 2014 | NVAF patients hospitalized for bleeding after starting OAC (AF diagnosis 6 months before starting one of the index drugs).                                                            | Age: 68.0 $\pm$ 12.5- 69.6 $\pm$ 12.6<br>Male: 61.8-62.9<br>CHA2DS2-VASc: 3.8 -3.8<br>CDI: 2.0-2.3                                       | Total length of hospital stay, proportion of patients admitted to the ICU, mean length of ICU stay, and all-cause 30- and 90-day mortality, ICD 9 codes, whether primary and secondary codes were used is not described.                                                             | Extreme weights: not reported.<br>Balance was tested using ANOVAs for significant differences | dabigatran: n=442<br>rivaroxaban n=256                                                                                 | There were no significant differences in relative risk of all-cause 30- or 90-day                                                                                                                                |
| Graham, 2016<br>USA    | Medicare<br>Nov 4, 2011 - June 30, 2014                                             | NVAF patients, at least 65 years old, initiating OAC at standard doses (first treatment, received no NOAC treatment for other indications in the last 6 months before the index date) | Age: 65-74 y: 50-51%<br>Age: 75-84: 40-40%<br>Age $\geq 85$ : 9-10%<br>Male: 53-53%<br>CHADS2 $\geq 2$ : 66-67%<br>Comorbidity index: NR | Thromboembolic stroke, ICH, major extracranial bleeding events and mortality (as the first study outcome or within 30 days after hospitalization for another primary outcome event), ICD 9 codes, whether primary and secondary codes were used is not described.                    | Extreme weights: not reported<br>Balanced if the absolute value of the STD was $\leq 10\%$ .  | rivaroxaban: n=66,651<br>dabigatran: n=52,240<br><br>Weighted cohorts<br>rivaroxaban: n=66,630<br>dabigatran: n=52,264 | Treatment with rivaroxaban was associated with statistically significant increases in intracranial bleeding and major extracranial bleeding, including major gastrointestinal bleeding, compared with dabigatran |

| Author and country      | Setting and study period                                                                                                                             | Study population                                                                                             | Patient characteristics (range between NOACs)                                                                                                      | Primary outcome definition                                                                                                                                                                                                                                                                                                                                          | IPWT details                                                                                           | Sample size                                                                                                                                                         | Result/conclusion as reported in the article                                                                                                                                                                                 |
|-------------------------|------------------------------------------------------------------------------------------------------------------------------------------------------|--------------------------------------------------------------------------------------------------------------|----------------------------------------------------------------------------------------------------------------------------------------------------|---------------------------------------------------------------------------------------------------------------------------------------------------------------------------------------------------------------------------------------------------------------------------------------------------------------------------------------------------------------------|--------------------------------------------------------------------------------------------------------|---------------------------------------------------------------------------------------------------------------------------------------------------------------------|------------------------------------------------------------------------------------------------------------------------------------------------------------------------------------------------------------------------------|
| Graham, 2019<br>USA     | fee-for-service Medicare Part A (hospitalization), Part B (office-based care), and Part D (prescription drug coverage)<br><br>Oct, 2010 - Sept, 2015 | NVAF patients of ≥65 years old (first initiation of treatment)                                               | Age (mean): 74.9-75.5<br>Male: 52.2-59.3%<br>CHA2DS2-VASc ≥2: 96.6-97.4%<br>Comorbidity index: NR                                                  | Hospitalized due to thromboembolic stroke, intracranial haemorrhage, major extracranial bleeding, and all-cause mortality. ICD codes from the first hospital discharge diagnosis position                                                                                                                                                                           | Not described how weighted cohort was composed.<br>Balanced if the absolute value of the STD was ≤10%. | rivaroxaban: n=106,389<br>dabigatran: n=86,198<br>apixaban: n=73,039<br><br>Weighted cohort<br>rivaroxaban: n=106,369<br>dabigatran: n=86,293<br>apixaban: n=72,921 | Dabigatran and apixaban were associated with a more favourable benefit-harm profile than rivaroxaban.                                                                                                                        |
| Hernandez, 2017<br>USA  | Medicare<br><br>Nov 4, 2011 -Dec 31, 2013                                                                                                            | NVAF patients (at any time before the index date; no NOAC treatment at least 3 months before the index date) | High dose:<br>Age: <65: 5.0-6.3%<br>Age: 65-74: 38.4-39.3%<br>Age: ≥75: 55.3-55.7%<br>Male: 45.9-49.5%<br>CHADS2: 3.3-3.3<br>Comorbidity index: NR | ischemic stroke (inpatient, emergency room, or outpatient claim with primary or secondary, ICD-9 codes), other thromboembolic events, and all-cause mortality; ICD 9 codes, whether primary and secondary codes were used is not described.<br>Any bleeding event and major bleeding; intracranial hemorrhage and gastrointestinal bleeding, not further described. | Extreme weights: not reported<br>Balanced if the absolute value of the STD was ≤10%.                   | dabigatran n=9,138<br>rivaroxaban n=8,367                                                                                                                           | There was no difference in stroke prevention between rivaroxaban and dabigatran; however, rivaroxaban was associated with a higher risk of thromboembolic events other than stroke, death, and bleeding.                     |
| Larsen, 2016<br>Denmark | Danish national prescription registry, Danish national patient register, Danish civil registration system<br><br>August, 2011 -Oct, 2015             | NVAF patients who were naïve to oral anticoagulants (no use of oral anticoagulant within one year)           | Age (median, IQR): 67.6 (62.0-72.4)-71.8 (65.7-78.9)<br>Male: 56.9-66.1%<br>CHA2DS2VASc: 2.2-2.8<br>Comorbidity index: NR                          | Ischaemic stroke or systemic embolism, ICD-10 codes whether primary and secondary codes were used is not described.                                                                                                                                                                                                                                                 | Extreme weights: not reported<br>Balanced if the absolute value of the STD was ≤10%.                   | dabigatran: n=12,701<br>rivaroxaban: n=7,192<br>apixaban: n=6,349                                                                                                   | Apixaban and dabigatran were associated with a significantly lower risk of death compared with rivaroxaban. Risk of any bleeding or major bleeding were significantly lower for apixaban and dabigatran than for rivaroxaban |
| Meng, 2019<br>Taiwan    | National Health Insurance claims database<br><br>June 1, 2012 - May 31, 2015                                                                         | All NVAF patients aged ≥20 years who initiated NOACs during study period                                     | Age <65: 11.8-13.5%<br>Age 65-74: 29.7-32.7%<br>Age ≥75: 53.8-58.4%<br>Male: 54.6-56.2%<br>CHA2DS2-VASc: 3.2-3.3<br>Comorbidity index: NR          | all-cause death, ischemic stroke, intracranial hemorrhage, gastrointestinal hemorrhage needing transfusion, ICD-10 codes, whether primary and                                                                                                                                                                                                                       | Extreme weights: not reported<br>Balanced if the absolute value of the STD was ≤10%.                   | dabigatran: n=13,505<br>rivaroxaban: n=6,551<br><br>Weighted pseudo-cohort                                                                                          | Rivaroxaban seemed to be associated with an increased risk of all-cause death compared with dabigatran                                                                                                                       |

1  
2  
3  
4  
5  
6  
7  
8  
9  
10  
11  
12  
13  
14  
15  
16  
17  
18  
19  
20  
21  
22  
23  
24  
25  
26  
27  
28  
29  
30  
31  
32  
33  
34  
35  
36  
37  
38  
39  
40  
41  
42  
43  
44  
45  
46

| Author and country | Setting and study period | Study population | Patient characteristics (range between NOACs) | Primary outcome definition                 | IPWT details | Sample size                                | Result/conclusion as reported in the article |
|--------------------|--------------------------|------------------|-----------------------------------------------|--------------------------------------------|--------------|--------------------------------------------|----------------------------------------------|
|                    |                          |                  |                                               | secondary codes were used is not described |              | dabigatran: n=13,508; rivaroxaban: n=6,547 |                                              |

For peer review only

1  
2  
3  
4  
5  
6  
7  
8  
9  
10  
11  
12  
13  
14  
15  
16  
17  
18  
19  
20  
21  
22  
23  
24  
25  
26  
27  
28  
29  
30  
31  
32  
33  
34  
35  
36  
37  
38  
39  
40  
41  
42  
43  
44  
45  
46

**Table 3. Characteristics of the included articles that used adjusted Cox-proportional hazard models as primary analyses (n=10)**

| Author and country         | Setting and study period                                                                                                                                                 | Study population                                                                                             | Patient characteristics (range between NOACs)                                                   | Primary outcome definition                                                                                                                                                                                                                                                              | Sample size                                                          | Results/conclusion as reported in the article                                                                                                                                                                                                                                                          |
|----------------------------|--------------------------------------------------------------------------------------------------------------------------------------------------------------------------|--------------------------------------------------------------------------------------------------------------|-------------------------------------------------------------------------------------------------|-----------------------------------------------------------------------------------------------------------------------------------------------------------------------------------------------------------------------------------------------------------------------------------------|----------------------------------------------------------------------|--------------------------------------------------------------------------------------------------------------------------------------------------------------------------------------------------------------------------------------------------------------------------------------------------------|
| Al-Khahili, 2016<br>Sweden | tertiary referral cardiology outpatient clinic (the Stockholm Heart Center)<br><br>Dec, 2011 - May, 2014                                                                 | NVAF patients from a single cardiology outpatient clinic incorporating the AF unit (initiate NOAC treatment) | Age: 72±8-73±8<br>Male: 50-51%<br>CHA2DS2-VASc: 3-3<br>Comorbidity index: NR                    | Major bleeding was defined according to the criteria of the International Society of Thrombosis and Hemostasis                                                                                                                                                                          | rivaroxaban: n=282;<br>apixaban: n=251<br>dabigatran: n=233;         | Rivaroxaban was associated with the highest bleeding rates owing mainly to the highest number of minor bleedings, and apixaban had the lowest bleeding rates and side effects                                                                                                                          |
| Alonso, 2017<br>USA        | Truven Health MarketScan® Commercial Claims and Encounter Database and the Medicare Supplemental and Coordination of Benefits Database<br><br>Jan 1, 2007 - Dec 31, 2014 | NVAF patients with a first prescription of OAC after Nov 2, 2011.                                            | Age: 67.2±12.4- 69.3±12.5<br>Male: 60.1-65.1%<br>CHA2DS2-VASc: 2.9-3.6<br>Comorbidity index: NR | Hospitalization for liver injury potentially related to drug hepatotoxicity, ICD-9-CM codes in any position                                                                                                                                                                             | rivaroxaban: n=30,347;<br>dabigatran: n=17,286;<br>apixaban: n=9,205 | Risk of liver disease hospitalization was higher in rivaroxaban users compared to dabigatran and apixaban users                                                                                                                                                                                        |
| Chan, 2016<br>Taiwan       | Taiwan National Health Insurance Research Database.<br><br>Jan 1, 1996 - Dec 31, 2013                                                                                    | NVAF patients newly diagnosed                                                                                | Age: 75±9- 76 ±9<br>Male: 54-58<br>CHA2DS2-VASc: 4.1-4.1<br>Comorbidity index: NR               | Ischemic stroke or systemic embolism, ICH, hospitalization for GI bleeding, acute myocardial infarction (AMI), all hospitalizations for bleeding, and all-cause mortality. All discharge diagnosis according to the ICD, whether primary and secondary codes were used is not described | dabigatran 110 mg: n= 5,921<br>rivaroxaban 10 mg: n=3,916            | No differences were found between rivaroxaban and dabigatran in risk for thromboembolic events, intracranial haemorrhage, critical gastrointestinal bleeding, or all-cause mortality. However, rivaroxaban was associated with a higher risk for noncritical gastrointestinal bleeding than dabigatran |

| Author and country                  | Setting and study period                                                                                                                                                                | Study population                                                                                                           | Patient characteristics (range between NOACs)                                                                | Primary outcome definition                                                                                                                                                                                 | Sample size                                                          | Results/conclusion as reported in the article                                                                                                                                                                                                                               |
|-------------------------------------|-----------------------------------------------------------------------------------------------------------------------------------------------------------------------------------------|----------------------------------------------------------------------------------------------------------------------------|--------------------------------------------------------------------------------------------------------------|------------------------------------------------------------------------------------------------------------------------------------------------------------------------------------------------------------|----------------------------------------------------------------------|-----------------------------------------------------------------------------------------------------------------------------------------------------------------------------------------------------------------------------------------------------------------------------|
| Hernandez, 2017<br>USA              | Medicare database<br>Jan 1, 2013 - Dec 31, 2014                                                                                                                                         | NVAF patients newly diagnosed                                                                                              | Age: 74.9±8.7-77.4±8.6<br>Male: 42.5-47.0%<br>CHA2DS2-VASc: 4.3-4.7<br>Comorbidity index: NR                 | Ischemic stroke, death, bleeding events, gastrointestinal bleeding, treatment persistence. ICD-9 codes, whether primary and secondary codes were used is not described                                     | rivaroxaban: n=5,139;<br>apixaban: n=2,358;<br>dabigatran: 1,415;    | Apixaban had the most favourable effectiveness and safety profile                                                                                                                                                                                                           |
| Lamberts, 2017<br>Denmark           | Danish national patient registry, Danish national prescription registry, Danish civil personal registry<br>up to December 31, 2015                                                      | NVAF patients ≥18 years, with newly prescribed OAC (no prescription at least 6 months before inclusion)                    | Age: 71.5±11.0-75.4±11.10<br>Male: 50.8-56.7%<br>CHA2DS2-VASc: 2.7-3.2<br>Comorbidity index: NR              | major bleeding events requiring hospitalisation, ICD-10 codes, whether primary and secondary codes were used is not described                                                                              | dabigatran: n=15,413;<br>apixaban: n=7,963;<br>rivaroxaban: n=6,715; | Apixaban had a lower adjusted major bleeding risk compared with rivaroxaban and dabigatran                                                                                                                                                                                  |
| Lip, 2016 (Int J Clin Pract)<br>USA | Truven MarketScan® Commercial & Medicare supplemental US database<br>Jan 1, 2013 - Dec 31, 2013                                                                                         | NVAF patients ≥18 years with newly prescribed OAC (no OACs received at least 1 year before the start of the OAC treatment) | Age: 66.8±12.2-69.3±12.3<br>Male: 63.1-65.8%<br>CHA2DS2-VASc: 2.6-2.8<br>CCI: 1.7-1.9                        | Major bleeding was identified using hospital claims, which had a bleeding diagnosis code as the first listed primary ICD-9 diagnosis code                                                                  | rivaroxaban: n=10,050<br>dabigatran: n=4,173<br>apixaban: n=2,402    | Initiation with rivaroxaban was associated with a significantly greater risk of major bleeding compared with initiation on apixaban. There was no significant difference in the risk of major bleeding among patients newly initiated on dabigatran compared with apixaban. |
| Mueller, 2019<br>Scotland           | Prescribing Information System, the Scottish Morbidity Records/ Hospital Inpatients and Outpatient attendance datasets; National Records of Scotland<br>Drug's approval date – Dec 2015 | NVAF patients who initiated NOAC treatment                                                                                 | Age: 71.1±12.0-74.8±11.0<br>Male: 53.5-73.1%<br>CHA2DS2-VASc: 2.5-3.0<br>CCI: 1.1-1.4                        | strokes, systemic embolism, death due to cardiovascular, pulmonary embolism, bleeding events, clinical endpoints, according to ICD-10 codes whether primary and secondary codes were used is not described | rivaroxaban: n=7,265<br>apixaban: n=6,200;<br>dabigatran: n=1,112;   | All NOACs were similarly effective in preventing strokes and systemic embolisms, while patients being treated with rivaroxaban exhibited the highest bleeding risks.                                                                                                        |
| Staerk, 2018<br>Denmark             | Danish national patient registry, Danish national prescription registry,                                                                                                                | NVAF patients, first-time OAC users (no previous OAC use), between 30 and 100 years old                                    | Standard dose:<br>Age (median, IQR): 67(61, 71)-71(65, 78)<br>Male: 55.4-63.7%<br>CHA2DS2-VASc (median); 2-3 | stroke/thromboembolism (TE), ischaemic stroke, major bleeding, intracranial bleeding and gastrointestinal bleeding, ICD-10 codes whether primary and                                                       | dabigatran: n=11,492<br>apixaban: n=11,064<br>rivaroxaban: n=8966    | Rivaroxaban was associated with higher bleeding risk                                                                                                                                                                                                                        |

| Author and country         | Setting and study period                                                                                                                                     | Study population                                                                              | Patient characteristics (range between NOACs)                                                            | Primary outcome definition                                                                                                         | Sample size                                                          | Results/conclusion as reported in the article                                                                                                                                                                                                                                                                                                              |
|----------------------------|--------------------------------------------------------------------------------------------------------------------------------------------------------------|-----------------------------------------------------------------------------------------------|----------------------------------------------------------------------------------------------------------|------------------------------------------------------------------------------------------------------------------------------------|----------------------------------------------------------------------|------------------------------------------------------------------------------------------------------------------------------------------------------------------------------------------------------------------------------------------------------------------------------------------------------------------------------------------------------------|
|                            | Danish civil registration system<br><br>March 1, 2012 - Dec 31, 2016                                                                                         |                                                                                               | Comorbidity index: NR                                                                                    | secondary codes were used is not described                                                                                         |                                                                      | compared with dabigatran and apixaban and dabigatran was associated with lower intracranial bleeding risk compared with rivaroxaban and apixaban.                                                                                                                                                                                                          |
| Tepper, 2018<br><br>USA    | Truven MarketScan Commercial Claims and Encounter and Medicare Supplemental & Coordination of Benefits Early View Database<br><br>Jan 1, 2013 - Oct 31, 2014 | NVAf patients aged ≥18 years with new initiators of NOACs or switched from warfarin to a NOAC | Age: 68±12- 70±12<br>Male: 65.3-62.7<br>CHA2DS2-VASc: 2.4-2.5<br>CCI: 1.6-1.8                            | Bleeding, ICD-9-CM codes, whether primary and secondary codes were used is not described                                           | rivaroxaban: n=30,529<br>dabigatran: n=20,963<br>apixaban: n=8,785;; | Rivaroxaban appeared to have an increased risk of any bleeding, clinically relevant non-major bleeding, and major inpatient bleeding, compared to apixaban patients. There was no significant difference in any bleeding, clinically relevant non-major bleeding, or inpatient major bleeding risks between patients treated with dabigatran and apixaban. |
| Vinogradova 2018<br><br>UK | UK general practices contributing to QResearch or Clinical Practice Research Datalink<br><br>2011 - 2016                                                     | NVAf patients, new NOAC (received no OAC treatment in at least the last 12 months)            | QResearch:<br>Age: 74.7±10.7- 76.5±10.9<br>Male: 51.8-58.0%<br>CHA2DS2-VASc: NR<br>Comorbidity index: NR | Major bleeding after entry to the study which led to a hospital admission or death, based on linked hospital or mortality records. | rivaroxaban: n= 16,547<br>apixaban: n= 10,601<br>dabigatran: n=5,537 | Apixaban was associated with a lower risk of major bleed than rivaroxaban. Rivaroxaban was associated with a higher risk of intracranial bleed compared to apixaban. rivaroxaban was associated with higher risks compared with apixaban for haematuria, all gastrointestinal bleed and upper gastrointestinal bleed.                                      |

1  
2  
3  
4  
5  
6  
7  
8  
9  
10  
11  
12  
13  
14  
15  
16  
17  
18  
19  
20  
21  
22  
23  
24  
25  
26  
27  
28  
29  
30  
31  
32  
33  
34  
35  
36  
37  
38  
39  
40  
41  
42  
43  
44  
45  
46

| Author and country | Setting and study period | Study population | Patient characteristics (range between NOACs) | Primary outcome definition | Sample size | Results/conclusion as reported in the article                                         |
|--------------------|--------------------------|------------------|-----------------------------------------------|----------------------------|-------------|---------------------------------------------------------------------------------------|
|                    |                          |                  |                                               |                            |             | The risk of primary ischaemic stroke did not differ between any of the anticoagulants |

For peer review only



**Table 4. Characteristics of the included articles that used unadjusted primary analysis (n=2)**

| Author and country   | Setting and study period                                                                                                                                                    | Study population                                                                                                                       | Patient characteristics (range between NOACs)                                                   | Primary outcome definition                                                                                                                                                                                                                            | Primary analysis                                                                                    | Sample size                                                                    | Results/conclusion as reported in the article                                                                                                                                               |
|----------------------|-----------------------------------------------------------------------------------------------------------------------------------------------------------------------------|----------------------------------------------------------------------------------------------------------------------------------------|-------------------------------------------------------------------------------------------------|-------------------------------------------------------------------------------------------------------------------------------------------------------------------------------------------------------------------------------------------------------|-----------------------------------------------------------------------------------------------------|--------------------------------------------------------------------------------|---------------------------------------------------------------------------------------------------------------------------------------------------------------------------------------------|
| Cerda, 2019<br>Spain | Oral Anticoagulant Treatment Unit of the Hemostasis and Thrombosis Department of the University Hospital Vall d'Hebron from Barcelona (Spain)<br><br>Jan, 2015 - Sept, 2017 | NVAF patients with nonvalvular AF, with or without prior stroke, that had started treatment with any NOAC for the prevention of stroke | Age: 73.1±15.2- 78.9±8.7<br>Male: 45.1-63.4%<br>CHA2DS2-VASc: 3.9-4.4<br>Comorbidity index: NR  | Major bleeding according to ISTH 2005                                                                                                                                                                                                                 | log-rank test                                                                                       | rivaroxaban: n=663;<br>dabigatran: n=352<br>apixaban: n=325<br>edoxaban: n=103 | Rates of ischemic stroke and intracranial hemorrhage were similar among different NOACs, but rates of major bleeding were higher with dabigatran and apixaban and lower with rivaroxaban.   |
| Li, 2017<br>China    | Queen Mary Hospital, Hong Kong<br><br>Jan, 2008 - Dec, 2014                                                                                                                 | NVAF patients diagnosed during study period.                                                                                           | Age: 71.9±11.1- 73.3±12.1<br>Male: 53.1-59.8%<br>CHA2DS2-VASc: 3.6-3.7<br>Comorbidity index: NR | The primary outcome was a composite of hospital admission with ischemic stroke or ICH, or death during the follow-up period. ICD-10 codes in medical records, and discharge summaries, whether primary and secondary codes were used is not described | Cox proportional hazard model (likely unadjusted, but this is not clearly described in the article) | rivaroxaban: n=669;<br>dabigatran: n=467                                       | Dabigatran had a lower ischemic stroke risk compared with patients on rivaroxaban. There was no significant difference in ischemic stroke risk between those on rivaroxaban and dabigatran. |

**Table 5. Characteristics of the included articles that used propensity score stratification as primary analyses (n=1)**

| Author and country               | Setting and study period                                                                                                                      | Study population                                                                          | Patient characteristics (range between NOACs)                                                                  | Primary outcome definition                                                                                                                                                  | PS details                                                                                                                                                    | Sample size                                  | Results/conclusion as reported in the article                                                                                   |
|----------------------------------|-----------------------------------------------------------------------------------------------------------------------------------------------|-------------------------------------------------------------------------------------------|----------------------------------------------------------------------------------------------------------------|-----------------------------------------------------------------------------------------------------------------------------------------------------------------------------|---------------------------------------------------------------------------------------------------------------------------------------------------------------|----------------------------------------------|---------------------------------------------------------------------------------------------------------------------------------|
| Gorst-Rasmussen, 2016<br>Denmark | Danish national prescription registry, Danish national patient register, Danish civil registration system<br><br>Feb. 1, 2012 - July 31, 2014 | NVAF patients who were new-users of OAC (no OAC treatment in at least the last two years) | Standard dose:<br>Age: 66.0±8.5-72.8±9.9<br>Male: 51.1-63.5%<br>CHA2DS2-Vasc: 2.1-3.0<br>Comorbidity index: NR | ischemic stroke/systemic embolism/transient ischemic attack, any bleeding and all-cause death. ICD-10 codes, whether primary and secondary codes were used is not described | Asymmetric trimming of the propensity score. Trimmed propensity score was used in 10 deciles as strata<br>Balanced if the absolute value of the STD was ≤10%. | dabigatran: n=8,908<br>rivaroxaban: n=1,405; | Rivaroxaban and dabigatran had similar stroke rates. Bleeding and mortality rates were higher in rivaroxaban versus dabigatran. |

Peer review only

**Table 6. Main differences between the included studies (n=39)**

| Study item                                           | Range, total number of studies, or description                                                                                                                                                                                                                                                                                                    |
|------------------------------------------------------|---------------------------------------------------------------------------------------------------------------------------------------------------------------------------------------------------------------------------------------------------------------------------------------------------------------------------------------------------|
| Country                                              | USA: n=24<br>Denmark: n=5<br>Taiwan: n=4<br>China: n=1<br>France: n=1<br>Scotland: n=1<br>Sweden: n=1<br>Spain: n=1<br>UK: n=1                                                                                                                                                                                                                    |
| NOAC included in included studies                    | Dabigatran: n=39<br>Rivaroxaban: n=39<br>Apixaban: n=26<br>Edoxaban: n=1                                                                                                                                                                                                                                                                          |
| Most prescribed NOAC in included studies per country | Dabigatran: Denmark<br>Rivaroxaban: USA, UK, China, Scotland, and Taiwan<br>Apixaban: In none of the included studies<br>Edoxaban: In none of the included studies<br>About equal*: France, Spain, Sweden                                                                                                                                         |
| Baseline characteristics                             | Mean age, years: 65-84<br>% males: 39-73<br>Mean CHA2DS2-Vasc: 2.1-4.9                                                                                                                                                                                                                                                                            |
| Primary study outcomes                               | Effectiveness outcomes:<br>- stroke,<br>- systemic embolism or composite of stroke/systemic embolism,<br>- all-cause death,<br>- myocardial infarction,<br>- venous thromboembolism.<br>Safety outcomes:<br>- major bleeding,<br>- a specific type of bleeding (e.g. intracranial haemorrhage, gastrointestinal bleeding etc.,<br>- liver injury. |
| Statistical approaches                               | PS matching: n=18<br>IPTW: n=8<br>PS stratification: n=1<br>Cox PH regression model: n=10<br>Unadjusted analyses: n=2                                                                                                                                                                                                                             |
| Sample size                                          | N=698 - N=265,583                                                                                                                                                                                                                                                                                                                                 |
| Study results                                        | Of the 26 studies in which apixaban, rivaroxaban and dabigatran were included:<br>- apixaban was favourable compared to dabigatran and rivaroxaban: n=13<br>- no single favourable NOAC: n=13                                                                                                                                                     |

\* about equal distribution between dabigatran, rivaroxaban and apixaban. Edoxaban is not included in these studies.

1  
2  
3 More than 50% of the studies were conducted in the USA (n=24),[16-39] five were conducted in Denmark,[40-44]  
4 four in Taiwan,[45-48] and one in France,[49] Sweden,[50] Scotland,[51] the UK,[52] Spain,[53] and China.[54]  
5  
6 Dabigatran and rivaroxaban were included in all 39 studies, apixaban was included in 26 studies and edoxaban  
7  
8 was included in 1 study. Next to these NOACs, VKA was included in 25 of these studies as one of the  
9  
10 comparators. The results below focus on the NOAC to NOAC comparisons only.

11  
12 In the studies that included apixaban, dabigatran and rivaroxaban, rivaroxaban was most dominantly used in the  
13  
14 USA, UK, Scotland, and Taiwan, while dabigatran was the most prescribed NOAC in Denmark. In three other  
15  
16 European studies the distribution was about equal between the three NOACs. In none of the included studies,  
17  
18 apixaban was the most dominantly prescribed NOAC.

### 21 **Setting**

22 Most studies concerned patient registries, pharmacy or prescription databases and/or health insurance databases  
23  
24 (n=39), while there were three clinical practice based studies.[50, 53, 54]

### 27 **Study population**

28  
29 All studies included only NVAF patients. In seven studies, it was specifically described that patients were newly  
30  
31 diagnosed with NVAF and initiated NOAC treatment during study period.[21, 27, 34, 37, 40, 45, 54] None of the  
32  
33 other studies included prevalent users of (N)OAC, but included e.g. 'newly treated', 'initiating treatment', 'new  
34  
35 users', 'first-time prescription' of NVAF patients who were prescribed (N)OAC. In some studies (N)OAC use in the  
36  
37 past (between 3 months and 2 years before index date) was allowed, while this seemed not be allowed in some  
38  
39 other studies, or it was not described.

### 41 *Inclusion criteria*

42  
43 Five studies concerned elderly patients specifically (i.e.  $\geq 65$  years old),[19, 21, 23-25] two included adults  $\geq 45$   
44  
45 years old,[33, 40] and one study included patients between 30 and 100 years of age.[44] The other studies  
46  
47 included all adults with atrial fibrillation (it was assumed that if no further age specification was provided, 'adults'  
48  
49 meant that all  $>18$  years old were included). In one study only patients who were hospitalised for bleeding after  
50  
51 start with OAC treatment were included.[22] No other focus on a specific group of AF patients was found.

### 54 *Exclusion criteria*

55  
56 NOAC use that could be related to other disorders, such as transient AF, major knee or hip surgery, venous  
57  
58 thromboembolism or pulmonary embolism, were specifically described as exclusion criteria in most studies,  
59  
60

1  
2  
3 except in ten studies.[16, 27, 28, 33-35, 50, 52-54] In one study patients with liver injury before their first oral  
4 anticoagulant (OAC) prescription were specifically excluded.[18]  
5  
6  
7

### 8 *Baseline characteristics*

9  
10 Baseline characteristics of the NVAF patients differed between studies. Mean age ranged from 65-84 years  
11 between the studies. The percentage of males ranged from 39-73%, and the mean CHA2DS2-Vasc Score ranged  
12 from 2.1-4.9. Excluding the five studies that specifically focussed on an elderly population of  $\geq 65$  years old and  
13 the two additional studies that used the Medicare database (only patients of 65 years or older are in Medicare),  
14 the mean age ranged from 65-78 years old. Different measures were used to assess the comorbidity index:  
15 Charlson comorbidity index, Charlson-Deyo index and Gagne comorbidity score, while in 30 of the 43 studies no  
16 comorbidity index was presented.  
17  
18  
19  
20  
21  
22

### 23 **Selection of covariates**

24  
25 Most studies (n=34) did not provide a rationale for the selection of covariates that were included in the PS model  
26 or in adjusted analysis. However, in one of the articles an extensive rationale and selection procedure of co-  
27 variates that were included in the analysis was provided.[33] In three other studies, the authors selected  
28 covariates based on medical knowledge on risk factors with reference to earlier published studies.[31, 39, 52] In  
29 one other study it was reported that sociodemographic and clinical characteristics that were associated with  
30 treatment initiation and the risk of major bleeding were included in the model to adjust for differences across  
31 cohorts, without further explanation or reference.[30]  
32  
33  
34  
35  
36  
37  
38

### 39 **Definition primary study outcomes**

40  
41 Primary outcomes differed between the studies. Effectiveness outcomes included in the studies included stroke,  
42 systemic embolism, (or composite of stroke/systemic embolism), all-cause death, myocardial infarction, venous  
43 thromboembolism and safety outcomes included major bleeding, or a specific type of bleeding (e.g. intracranial  
44 haemorrhage, gastrointestinal bleeding etc.) and liver injury. In most studies, ICD-9 or ICD-10 codes were used,  
45 but whether this concerned a primary diagnosis only or whether it could be either a primary or a second diagnosis  
46 differed between the studies. In some studies it was not described whether the ICD codes referred to primary  
47 diagnosis only or to a primary or secondary diagnosis.  
48  
49  
50  
51  
52  
53

### 54 **Statistical approaches to adjust for confounding (primary analysis)**

55  
56 In 18 studies, PS matching was done.[16, 19-21, 23, 26, 29, 30, 32-37, 39, 40, 47, 49] IPTW was used in eight  
57 studies.[17, 22, 24, 25, 28, 43, 46, 48] PS stratified analyses was done in one study.[41] In twelve studies, the  
58 primary analyses utilised a Cox PH regression model in which adjustment for confounding was done.[18, 27, 31,  
59  
60

1  
2  
3 38, 42, 44, 45, 50-52] Finally, in two studies no adjustment for differences in baseline characteristics was  
4 performed.[53, 54]  
5  
6  
7

### 8 *PS matching*

#### 9 Co-variables

10 Creatinine clearance was not included as a covariate in any of the 18 studies. All 18 studies took the following  
11 covariates into account: age, sex, CHA2DS2-VASc score and/or the individual comorbidities included in this  
12 score, HAS-BLED score and/or the individual conditions included in this score (except alcohol use in Lai et al.  
13 [47]), renal disease, and co-medication use such as antiplatelets. Some included other comorbidities, such as  
14 cancer, rheumatic disease, specific heart diseases, COPD, HIV, dementia, depression, neurological disorders,  
15 and/or a various list of co-medications as well.  
16  
17  
18  
19  
20  
21  
22

#### 23 Matching method

24 In one study the matching method was not described.[49] In two studies, the calliper used was not described.[23,  
25 29] In seven studies 1:1 PS matching without replacement was used and a calliper of 0.01 was applied.[16, 19,  
26 20, 26, 30, 32, 36] Five other studies also matched 1:1 without replacement but used another calliper: in three  
27 studies a calliper of 0.2 was used,[39, 40, 47] while two others used a calliper of <0.25.[33, 35] In three studies,  
28 three-way matching was used.[21, 34, 37]  
29  
30  
31  
32  
33  
34

#### 35 Balance co-variables

36 In two studies it was not described how the balance between covariates was evaluated.[33, 35] In two studies the  
37 balance was evaluated using  $p < 0.05$  (of which one also used standardized difference of <10%),[23, 47] and in  
38 another study it was stated that the groups were comparable even though a  $p$  value of  $> 0.05$  was found.[29]  
39 Balance was checked with an absolute standardized difference of <10% in 13 studies.[16, 19-21, 26, 30, 32, 34,  
40 36, 37, 39, 40, 47, 49] Balance was reached in all studies after matching.  
41  
42  
43  
44  
45  
46  
47

#### 48 Sample size

49 In four studies the sample size before matching was not reported[29, 35, 36, 39] and in one study the sample size  
50 after matching was not reported.[34] At study start (before PSM), sample size between the NOACs differed  
51 greatly, except in three studies.[21, 37, 40]  
52  
53  
54

### 55 *IPTW*

56  
57  
58  
59  
60

1  
2  
3 In one study, balance was tested using ANOVAs for significant differences.[22] Balance was checked with an  
4 absolute standardized difference of <10% in the other nine studies.[17, 24, 25, 28, 43, 46, 48] Balance was  
5 reached in all studies after IPTW.  
6  
7

8 There was no reporting on extreme weights in the eight included studies.[17, 22, 24, 25, 28, 43, 46, 48]  
9

### 10 11 *PS stratification*

12  
13 In one study, asymmetric trimming of the PS was done, which resulted in a small part of both treatment groups  
14 being removed in order to gain in comparability. Balance in co-variables was reached with standardized difference  
15 of <10%. In a Cox model this trimmed PS was used in 10 deciles as strata.[41]  
16  
17

### 18 19 20 Cox HP regression models

21  
22 In ten studies, Cox HP regression models were applied with adjustment for a number of confounders.[18, 27, 31,  
23 38, 42, 44, 45, 50-52] In one of these studies, the number of events per variable was not sufficient for such an  
24 analyses.[50] The ratio was acceptable in the other studies for at least some of the outcomes.[18, 28, 31, 38, 42,  
25 44, 45, 51, 52]  
26  
27  
28  
29

### 30 31 Unadjusted analysis

32  
33 In two studies no adjustment for confounding factors seemed to have been done, even though significant  
34 differences between treatment groups existed at baseline. Cerda et al. presented events per 100 patient-years  
35 and used a log-rank test to determine whether outcomes differed between the NOACs.[53] Li et al. conducted a  
36 Cox proportional hazard model, likely unadjusted, but this was not clearly described in the article.[54]  
37  
38  
39  
40

### 41 **Study results**

42  
43 Which NOAC performed best differed between the included studies. We found only one study that included all  
44 four NOACs, in which no preference for one specific NOAC was found, except that rates of major bleeding were  
45 lower with rivaroxaban.[53] Of the 26 studies in which apixaban, rivaroxaban and dabigatran were included,  
46 apixaban was favourable compared to dabigatran and rivaroxaban in 13 studies, of which 10 were from the USA,  
47 two from Europe and one from Asia,[16, 17, 19, 20, 23, 26, 28, 29, 32, 36, 42, 50, 52] while dabigatran and  
48 rivaroxaban were not found to be the single most favourable NOAC in any of the remaining 13 studies. Results for  
49 these 13 studies were mixed, with either no favourable NOAC at all, or one NOAC was selected as the least  
50 favourable, while the other two NOACs did not differ.  
51  
52  
53  
54  
55  
56  
57  
58  
59  
60

### Naïve trial analysis

The primary efficacy endpoint (Strokes/SE) in the warfarin arms were estimated at 1.69% (RE-LY),[3] 2.2% (ROCKET),[6] 1.60% (ARISTOTLE),[5] and 1.50% (ENGAGE),[4] see table 7. From this range we chose a relatively arbitrary base rate of 1.6% and applied the observed risk reduction to estimate comparable base rates of 1.05% for dabigatran, 1.24% for rivaroxaban, 1.26% for edoxaban and 1.27% for apixaban. Using the sample size calculator[55] the biggest expected difference was between dabigatran and apixaban and it was estimated that a trial sample size with 51,847 patients would be needed to confirm this difference. The smallest difference was between edoxaban and apixaban and a trial of 7,994,340 patients required to confirm that difference.

For peer review only



**Table 7. Primary efficacy and safety endpoints of the four pivotal trials.**

|                         | RE-LY [3]                   |                             |                    | ROCKET-AF [6]         |                    | ARISTOTLE [5]      |                    | ENGAGE-AF [4]            |                          |                    |
|-------------------------|-----------------------------|-----------------------------|--------------------|-----------------------|--------------------|--------------------|--------------------|--------------------------|--------------------------|--------------------|
|                         | Dabigatran 150 mg<br>N=6076 | Dabigatran 110 mg<br>N=6015 | Warfarin<br>N=6022 | Rivaroxaban<br>N=7131 | Warfarin<br>N=7133 | Apixaban<br>N=9120 | Warfarin<br>N=9081 | Edoxaban 60 mg<br>N=7035 | Edoxaban 30 mg<br>N=7034 | Warfarin<br>N=7036 |
| Stroke/SE (%/year)      | 1.11                        | 1.53                        | 1.69               | 1.7                   | 2.2                | 1.27               | 1.60               | 1.18                     | 1.61                     | 1.50               |
| Major bleeding (%/year) | 3.11                        | 2.71                        | 3.36               | 3.6                   | 3.4                | 2.13               | 3.09               | 2.75                     | 1.61                     | 3.43               |

For peer review only

1  
2  
3 The primary safety endpoint was major bleeding for RE-LY, ARISTOTLE, and ENGAGE AF and major bleeding  
4 plus clinically relevant non-major bleeding for ROCKET AF, but data on major bleeds only for ROCKET-AF are  
5 available as well. Major bleeds in the warfarin arms were estimated at 3.36% (RE-LY),<sup>[3]</sup> 3.4% (ROCKET),<sup>[6]</sup>  
6 3.09% (ARISTOTLE),<sup>[5]</sup> and 3.43% (ENGAGE).<sup>[4]</sup> From this range we choose a relatively arbitrary base rate of  
7 3.2% and applied the observed risk reduction to estimate comparable base rates of 2.21% for apixaban 2.57% for  
8 edoxaban, 2.96% for dabigatran and 3.29% for rivaroxaban. Using the sample size calculator,<sup>[55]</sup> the biggest  
9 expected difference was between rivaroxaban and apixaban and it was estimated that a trial with 7,196 patients  
10 would be needed to confirm this difference. A much smaller difference is between edoxaban and apixaban which  
11 would require a trial of 56,512 patients to confirm that difference.  
12  
13  
14  
15  
16  
17  
18  
19  
20  
21  
22  
23  
24  
25  
26  
27  
28  
29  
30  
31  
32  
33  
34  
35  
36  
37  
38  
39  
40  
41  
42  
43  
44  
45  
46  
47  
48  
49  
50  
51  
52  
53  
54  
55  
56  
57  
58  
59  
60

## DISCUSSION

In total, we found 39 studies directly comparing the effectiveness and/or safety of at least two NOACs in NVAF patients. Three studies can be considered to be of low quality due to insufficiently described methods and/or small sample size[50, 53, 54].

Even though the remaining studies could be considered of sufficiently quality based on the technical aspects of the studies, there are some issues that can hamper the generalisability of the results. These issues concern remaining confounding, the use of a smaller or broader calliper, differences in baseline characteristics between studies, channelling bias and change in treatment paradigm.

Balance in baseline characteristics between NOACs was checked with p-values or a standardized difference of <10%. Balance was well at baseline in some studies, or was reached after PS matching or IWTP.[56] Even though some studies included over 40 covariates in their PS, and balance was reached for all of these variables, one should keep in mind that balance between unmeasured or unmeasurable factors cannot be assumed.[14] Therefore, there is always a possibility of residual confounding. This possibility was acknowledged in all included studies. Creatinine clearance for instance, seems to be an important covariate as subgroup analyses from the pivotal trials suggest that renal clearance might be an effect modifier.[5, 57] Only in one study however, the authors were able to take renal clearance into account in the adjusted analyses.[50] Especially when prescription of a certain NOAC in daily practice is driven by creatinine clearance, not adjusting for this variable may lead to biased results.

In general, a calliper of <0.2 of the standard deviation of the logit of the PS is considered to be 'optimal'. [58] About half of the included PS matching studies used a smaller calliper, namely of <0.1. This means that the matching is more precise in these studies, but the disadvantage is that possibly more patients cannot be matched to another patient due to this smaller allowed maximum differences, and thus will be excluded from the analysis. Excluding patients from the analysis will limit the generalisability of the results to the total patient population, especially when the excluded patients differ from the included patients, e.g. on the baseline risk for stroke.

All included studies focused on NVAF patients only. NOAC use that could have been related to other conditions was excluded specifically in 34 of the 36 included studies. In eight studies, inclusion criteria regarding age were applied. Three of these will likely still cover the largest part of NOAC users as they set relatively broad age ranges. The other five focussed on an elderly population of NVAF patients of  $\geq 65$  years old. Besides applying specific inclusion criteria regarding age in some studies, these differences also depended on the specific registry

1  
2  
3 or database that was used, e.g. Medicare is for people of 65 years old or older. Even though only five of the  
4 included studies focused on an elderly NVAF population, and the others applied broad age ranges, there were  
5 differences in mean age, proportion of males and mean CHA2DS2Vasc score between the studies, which can  
6 have an impact on the results and jeopardize the generalisability of the results.  
7  
8  
9

10  
11 Rivaroxaban was the most prescribed NOAC in almost all included studies from the USA. However, in the first  
12 quarter of 2017, apixaban was the most prescribed NOAC in NVAF in the USA (i.e. in 50% of new OAC  
13 prescriptions). Especially older patients, women, increased stroke or bleeding risk and having comorbidities was  
14 associated with prescription of apixaban versus other NOACs.[59] Rivaroxaban was also the most prescribed  
15 NOAC in the included studies from the UK and Scotland. Based on the CPRD, 56.5% of the OAC prescriptions  
16 concerned a NOAC, of which rivaroxaban was still described most often in 2015.[60] Dabigatran was described  
17 most often in the studies from Denmark. Haastrup et al. described that most AF patients that initiated NOAC  
18 received dabigatran between 2008 and 2016, but a trend was observed that per 1000 person-years the number of  
19 patients described dabigatran decreased and the number of patients receiving rivaroxaban and apixaban  
20 increased.[61] This shows that the treatment paradigm changed over time, and might still be changing, and this  
21 pattern differs between the USA, Europe and Asia. Channelling bias therefore likely occurs.  
22  
23  
24  
25  
26  
27  
28  
29

30 Our naïve analysis predicts that in terms of the primary efficacy outcome observational studies will need a  
31 relatively high number of patients to be able to demonstrate the differences between the NOACs and a small  
32 sample size will not allow robust comparison to be made.  
33  
34  
35  
36

37 The pattern of major bleeding events seen in the included observational studies, confirms the expectation from  
38 our naïve analysis of the pivotal clinical trials that rivaroxaban seems to have the least favourable safety profile  
39 among apixaban and dabigatran. The findings are not consistent to allow for a robust conclusion between  
40 apixaban and dabigatran which confirms the need for a high number of patients, although a trend for a slight  
41 better safety profile of apixaban can be observed.  
42  
43  
44  
45

46 The requirement for a high number of patients to compare NOACs both in terms of efficacy and safety as  
47 predicted by the pivotal trial results is confirmed by the findings of the observational studies. This finding may  
48 support the claim that the differences between the NOACs are relatively small.  
49  
50  
51

52  
53 In summary, even though the larger part of these studies are technically well conducted, these studies have some  
54 important limitations regarding the generalisability of the study results especially given the relatively high patient  
55 number required for a meaningful comparison between NOACs. Most studies included all NVAF patients on  
56 NOAC available in the registry/database during the study period and did not apply further specific in- and  
57 exclusion criteria, but differences between studies regarding baseline characteristics existed. Mean age at study  
58  
59  
60

1  
2  
3 start and baseline risk for stroke (CHA2DS2-VASc score) differed between the studies. As channelling bias  
4 cannot be ruled out, the result of these studies might not be generalisable. Furthermore, results from the PS  
5 studies are only applicable to the patients that were kept in the analyses as patients excluded from the analysis  
6 likely differ from the ones that were included in the analysis. The 1:1 matched cohorts depended on the sample  
7 size of the NOAC with the least number of patients and as a result many patients from the larger of the two NOAC  
8 groups were excluded as they could not be matched. Besides these study specific limitations, differences in  
9 reimbursement and ICD-coding exist between the USA and Europe, and also within Europe. Differences in  
10 reimbursement may lead to differences in adherence and non-adherence could lead to worse outcomes. These  
11 limitations should be kept in mind when results of these studies are used to decide what NOAC should be  
12 prescribed for a certain patient. Finally, given the small differences between efficacy and safety outcomes  
13 between NOACs, the element of patient preference should be taken into consideration,[62] as tailoring anti-  
14 coagulation treatment towards patient preferences can promote adherence to treatment.  
15  
16  
17  
18  
19  
20  
21  
22  
23  
24  
25  
26  
27  
28  
29  
30  
31  
32  
33  
34  
35  
36  
37  
38  
39  
40  
41  
42  
43  
44  
45  
46  
47  
48  
49  
50  
51  
52  
53  
54  
55  
56  
57  
58  
59  
60

**ACKNOWLEDGEMENTS**

The authors would like to thank Pearl Gumbs for the initiation of this project and her input with regard to study design and interpretation of the data. Pearl Gumbs was working at Daiichi Sankyo Europe at that time.

For peer review only

**COMPETING INTEREST**

EB reports grants from Daiichi Sankyo, during the conduct of the study; grants from Daiichi Sankyo, outside the submitted work. BvH reports grants from Daiichi Sankyo, during the conduct of the study. SH reports personal fees from Aspen, personal fees from Bayer, personal fees from BMS/Pfizer, personal fees from Daiichi-Sankyo, personal fees from Portola, outside the submitted work. GS reports personal fees from Daiichi Sankyo Europe Gmbh, outside the submitted work. AC reports personal fees from Daiichi Sankyo Europe, during the conduct of the study; grants and personal fees from Bayer AG, personal fees from Boehringer Ingelheim, grants and personal fees from Bristol-Myers Squibb, grants and personal fees from Pfizer Limited, personal fees from Portola Pharmaceuticals Inc, personal fees from Janssen, personal fees from ONO Pharmaceuticals, from AbbVie, outside the submitted work.

**AUTHORS' CONTRIBUTION**

EB: Conceptualization (support); Methodology (equal); Writing – Original Draft Preparation; Writing – Review & Editing (equal). BvH: Conceptualization (support); Methodology (equal); Writing – Review & Editing (equal). SH: Conceptualization (support); Writing – Review & Editing (equal). GS: Conceptualization (support), Supervision; Writing – Review & Editing (equal). ATC: Conceptualization (lead); Writing – Review & Editing (equal)

For peer review only



1  
2  
3  
4  
5  
6  
7  
8  
9  
10  
11  
12  
13  
14  
15  
16  
17  
18  
19  
20  
21  
22  
23  
24  
25  
26  
27  
28  
29  
30  
31  
32  
33  
34  
35  
36  
37  
38  
39  
40  
41  
42  
43  
44  
45  
46  
47  
48  
49  
50  
51  
52  
53  
54  
55  
56  
57  
58  
59  
60

**DATA SHARING STATEMENT**

No new data were generated or analysed in support of this research.

For peer review only

**FUNDING**

This work was supported by Daiichi Sankyo Europe.

For peer review only

1  
2  
3 PATIENT AND PUBLIC INVOLVEMENT  
4

5 This research was done without patient involvement. Patients were not invited to comment on the study design  
6 and were not consulted to develop patient relevant outcomes or interpret the results. Patients were not invited to  
7 contribute to the writing or editing of this document for readability or accuracy.  
8  
9

10  
11  
12  
13  
14  
15  
16  
17  
18  
19  
20  
21  
22  
23  
24  
25  
26  
27  
28  
29  
30  
31  
32  
33  
34  
35  
36  
37  
38  
39  
40  
41  
42  
43  
44  
45  
46  
47  
48  
49  
50  
51  
52  
53  
54  
55  
56  
57  
58  
59  
60

For peer review only

## REFERENCES

1. Kirchhof P, Benussi S, Kotecha D, et al. 2016 ESC Guidelines for the management of atrial fibrillation developed in collaboration with EACTS. *Eur Heart J*. 2016;37(38):2893-962.10.1093/eurheartj/ehw210
2. January CT, Wann LS, Calkins H, et al. 2019 AHA/ACC/HRS Focused Update of the 2014 AHA/ACC/HRS Guideline for the Management of Patients With Atrial Fibrillation: A Report of the American College of Cardiology/American Heart Association Task Force on Clinical Practice Guidelines and the Heart Rhythm Society in Collaboration With the Society of Thoracic Surgeons. *Circulation*. 2019;140(2):e125-e51.10.1161/CIR.0000000000000665
3. Connolly SJ, Ezekowitz MD, Yusuf S, et al. Dabigatran versus warfarin in patients with atrial fibrillation. *N Engl J Med*. 2009;361(12):1139-51.10.1056/NEJMoa0905561
4. Giugliano RP, Ruff CT, Braunwald E, et al. Edoxaban versus warfarin in patients with atrial fibrillation. *N Engl J Med*. 2013;369(22):2093-104.10.1056/NEJMoa1310907
5. Granger CB, Alexander JH, McMurray JJ, et al. Apixaban versus warfarin in patients with atrial fibrillation. *N Engl J Med*. 2011;365(11):981-92.10.1056/NEJMoa1107039
6. Patel MR, Mahaffey KW, Garg J, et al. Rivaroxaban versus warfarin in nonvalvular atrial fibrillation. *N Engl J Med*. 2011;365(10):883-91.10.1056/NEJMoa1009638
7. Petri H, Urquhart J. Channeling bias in the interpretation of drug effects. *Stat Med*. 1991;10(4):577-81.10.1002/sim.4780100409
8. Peduzzi P, Concato J, Feinstein AR, et al. Importance of events per independent variable in proportional hazards regression analysis. II. Accuracy and precision of regression estimates. *J Clin Epidemiol*. 1995;48(12):1503-10.10.1016/0895-4356(95)00048-8
9. Rosenbaum PR, Rubin DB. The central role of the propensity score in observational studies for causal effects. *Biometrical*. 1983;70(1):41-55
10. Brookhart MA, Schneeweiss S, Rothman KJ, et al. Variable selection for propensity score models. *Am J Epidemiol*. 2006;163(12):1149-56.10.1093/aje/kwj149
11. D'Agostino RB, Jr. Propensity score methods for bias reduction in the comparison of a treatment to a non-randomized control group. *Stat Med*. 1998;17(19):2265-81.10.1002/(sici)1097-0258(19981015)17:19<2265::aid-sim918>3.0.co;2-b
12. Austin PC, Stuart EA. The performance of inverse probability of treatment weighting and full matching on the propensity score in the presence of model misspecification when estimating the effect of treatment on survival outcomes. *Stat Methods Med Res*. 2017;26(4):1654-70.10.1177/0962280215584401
13. Austin PC. A critical appraisal of propensity-score matching in the medical literature between 1996 and 2003. *Stat Med*. 2008;27(12):2037-49.10.1002/sim.3150

- 1  
2  
3 14. Johnson ML, Crown W, Martin BC, et al. Good research practices for comparative effectiveness  
4 research: analytic methods to improve causal inference from nonrandomized studies of treatment effects using  
5 secondary data sources: the ISPOR Good Research Practices for Retrospective Database Analysis Task Force  
6 Report--Part III. *Value Health*. 2009;12(8):1062-73.10.1111/j.1524-4733.2009.00602.x  
7  
8  
9  
10 15. Yao XI, Wang X, Speicher PJ, et al. Reporting and Guidelines in Propensity Score Analysis: A  
11 Systematic Review of Cancer and Cancer Surgical Studies. *J Natl Cancer Inst*. 2017;109(8).10.1093/jnci/djw323  
12  
13 16. Abraham NS, Noseworthy PA, Yao X, et al. Gastrointestinal Safety of Direct Oral Anticoagulants: A  
14 Large Population-Based Study. *Gastroenterology*. 2017;152(5):1014-22.e1.10.1053/j.gastro.2016.12.018  
15  
16 17. Adeboyeje G, Sylwestrzak G, Barron JJ, et al. Major Bleeding Risk During Anticoagulation with Warfarin,  
17 Dabigatran, Apixaban, or Rivaroxaban in Patients with Nonvalvular Atrial Fibrillation. *J Manag Care Spec Pharm*.  
18 2017;23(9):968-78.10.18553/jmcp.2017.23.9.968  
19  
20 18. Alonso A, MacLehose RF, Chen LY, et al. Prospective study of oral anticoagulants and risk of liver injury  
21 in patients with atrial fibrillation. *Heart*. 2017;103(11):834-9.10.1136/heartjnl-2016-310586  
22  
23 19. Amin A, Keshishian A, Trocio J, et al. A Real-World Observational Study of Hospitalization and Health  
24 Care Costs Among Nonvalvular Atrial Fibrillation Patients Prescribed Oral Anticoagulants in the U.S. Medicare  
25 Population. *J Manag Care Spec Pharm*. 2018;24(9):911-20.10.18553/jmcp.2018.24.9.911  
26  
27 20. Amin A, Keshishian A, Vo L, et al. Real-world comparison of all-cause hospitalizations, hospitalizations  
28 due to stroke and major bleeding, and costs for non-valvular atrial fibrillation patients prescribed oral  
29 anticoagulants in a US health plan. *J Med Econ*. 2018;21(3):244-53.10.1080/13696998.2017.1394866  
30  
31 21. Briasoulis A, Inampudi C, Akintoye E, et al. Safety and Efficacy of Novel Oral Anticoagulants Versus  
32 Warfarin in Medicare Beneficiaries With Atrial Fibrillation and Valvular Heart Disease. *J Am Heart Assoc*.  
33 2018;7(8).10.1161/jaha.118.008773  
34  
35 22. Charlton B, Adeboyeje G, Barron JJ, et al. Length of hospitalization and mortality for bleeding during  
36 treatment with warfarin, dabigatran, or rivaroxaban. *PLoS One*.  
37 2018;13(3):e0193912.10.1371/journal.pone.0193912  
38  
39 23. Deitelzweig S, Luo X, Gupta K, et al. Comparison of effectiveness and safety of treatment with apixaban  
40 vs. other oral anticoagulants among elderly nonvalvular atrial fibrillation patients. *Curr Med Res Opin*.  
41 2017;33(10):1745-54.10.1080/03007995.2017.1334638  
42  
43 24. Graham DJ, Baro E, Zhang R, et al. Comparative Stroke, Bleeding, and Mortality Risks in Older  
44 Medicare Patients Treated with Oral Anticoagulants for Nonvalvular Atrial Fibrillation. *Am J Med*.  
45 2019.10.1016/j.amjmed.2018.12.023  
46  
47 25. Graham DJ, Reichman ME, Wernecke M, et al. Stroke, Bleeding, and Mortality Risks in Elderly Medicare  
48 Beneficiaries Treated With Dabigatran or Rivaroxaban for Nonvalvular Atrial Fibrillation. *JAMA Intern Med*.  
49 2016;176(11):1662-71.10.1001/jamainternmed.2016.5954  
50  
51  
52  
53  
54  
55  
56  
57  
58  
59  
60

- 1  
2  
3 26. Gupta K, Trocio J, Keshishian A, et al. Real-World Comparative Effectiveness, Safety, and Health Care  
4 Costs of Oral Anticoagulants in Nonvalvular Atrial Fibrillation Patients in the U.S. Department of Defense  
5 Population. *J Manag Care Spec Pharm*. 2018;24(11):1116-27.10.18553/jmcp.2018.17488  
6  
7  
8 27. Hernandez I, Zhang Y, Saba S. Comparison of the Effectiveness and Safety of Apixaban, Dabigatran,  
9 Rivaroxaban, and Warfarin in Newly Diagnosed Atrial Fibrillation. *Am J Cardiol*. 2017;120(10):1813-  
10 9.10.1016/j.amjcard.2017.07.092  
11  
12  
13 28. Hernandez IZY. Comparing Stroke and Bleeding with Rivaroxaban and Dabigatran in Atrial Fibrillation:  
14 Analysis of the US Medicare Part D Data. *Am J Cardiovasc Drugs*. 2017;17(1):37-47.10.1007/s40256-016-0189-9  
15  
16  
17 29. Lin J, Trocio J, Gupta K, et al. Major bleeding risk and healthcare economic outcomes of non-valvular  
18 atrial fibrillation patients newly-initiated with oral anticoagulant therapy in the real-world setting. *J Med Econ*.  
19 2017;20(9):952-61.10.1080/13696998.2017.1341902  
20  
21  
22 30. Lip GY, Keshishian A, Kamble S, et al. Real-world comparison of major bleeding risk among non-valvular  
23 atrial fibrillation patients initiated on apixaban, dabigatran, rivaroxaban, or warfarin. A propensity score matched  
24 analysis. *Thromb Haemost*. 2016;116(5):975-86.10.1160/th16-05-0403  
25  
26  
27 31. Lip GY, Pan X, Kamble S, et al. Major bleeding risk among non-valvular atrial fibrillation patients initiated  
28 on apixaban, dabigatran, rivaroxaban or warfarin: a "real-world" observational study in the United States. *Int J Clin*  
29 *Pract*. 2016;70(9):752-63.10.1111/ijcp.12863  
30  
31  
32 32. Lip GYH, Keshishian A, Li X, et al. Effectiveness and Safety of Oral Anticoagulants Among Nonvalvular  
33 Atrial Fibrillation Patients. *Stroke*. 2018;49(12):2933-44.10.1161/STROKEAHA.118.020232  
34  
35  
36 33. Lutsey PL, Norby FL, Zakai NA, et al. Oral anticoagulation therapy and subsequent risk of venous  
37 thromboembolism in atrial fibrillation patients. *Curr Med Res Opin*. 2019;35(5):837-  
38 45.10.1080/03007995.2018.1541445  
39  
40  
41 34. Mentias A, Shantha G, Chaudhury P, et al. Assessment of Outcomes of Treatment With Oral  
42 Anticoagulants in Patients With Atrial Fibrillation and Multiple Chronic Conditions: A Comparative Effectiveness  
43 Analysis. *JAMA Netw Open*. 2018;1(5):e182870.10.1001/jamanetworkopen.2018.2870  
44  
45  
46 35. Norby FL, Bengtson LGS, Lutsey PL, et al. Comparative effectiveness of rivaroxaban versus warfarin or  
47 dabigatran for the treatment of patients with non-valvular atrial fibrillation. *BMC Cardiovasc Disord*.  
48 2017;17(1):238.10.1186/s12872-017-0672-5  
49  
50  
51 36. Noseworthy PA, Yao X, Abraham NS, et al. Direct Comparison of Dabigatran, Rivaroxaban, and  
52 Apixaban for Effectiveness and Safety in Nonvalvular Atrial Fibrillation. *Chest*. 2016;150(6):1302-  
53 12.10.1016/j.chest.2016.07.013  
54  
55  
56 37. Shantha PSG, Bhave PD, Girotra S, et al. Sex-Specific Comparative Effectiveness of Oral  
57 Anticoagulants in Elderly Patients With Newly Diagnosed Atrial Fibrillation. *Circ Cardiovasc Qual Outcomes*.  
58 2017;10(4).10.1161/circoutcomes.116.003418  
59  
60

- 1  
2  
3 38. Tepper PG, Mardekian J, Masseria C, et al. Real-world comparison of bleeding risks among non-valvular  
4 atrial fibrillation patients prescribed apixaban, dabigatran, or rivaroxaban. *PLoS One*.  
5  
6 2018;13(11):e0205989.10.1371/journal.pone.0205989  
7  
8 39. Villines TCAAPMTWEARTTDOKSE. Comparative safety and effectiveness of dabigatran vs. rivaroxaban  
9 and apixaban in patients with non-valvular atrial fibrillation: A retrospective study from a large healthcare system.  
10  
11 *Eur Heart J - Cardiovascular Pharmacotherapy*. 2019;5(2):80-90.10.1093/ehjcvp/pvy044 FULL TEXT LINK  
12 <http://dx.doi.org/10.1093/ehjcvp/pvy044>  
13  
14 40. Andersson NW, Svanstrom H, Lund M, et al. Comparative effectiveness and safety of apixaban,  
15 dabigatran, and rivaroxaban in patients with non-valvular atrial fibrillation. *Int J Cardiol*. 2018;268:113-  
16  
17 9.10.1016/j.ijcard.2018.03.047  
18  
19 41. Gorst-Rasmussen A, Lip GY, Bjerregaard Larsen T. Rivaroxaban versus warfarin and dabigatran in atrial  
20 fibrillation: comparative effectiveness and safety in Danish routine care. *Pharmacoepidemiol Drug Saf*.  
21  
22 2016;25(11):1236-44.10.1002/pds.4034  
23  
24 42. Lamberts M, Staerk L, Olesen JB, et al. Major Bleeding Complications and Persistence With Oral  
25 Anticoagulation in Non-Valvular Atrial Fibrillation: Contemporary Findings in Real-Life Danish Patients. *J Am*  
26  
27 *Heart Assoc*. 2017;6(2).10.1161/jaha.116.004517  
28  
29 43. Larsen TB, Skjoth F, Nielsen PB, et al. Comparative effectiveness and safety of non-vitamin K antagonist  
30 oral anticoagulants and warfarin in patients with atrial fibrillation: propensity weighted nationwide cohort study.  
31  
32 *BMJ*. 2016;353:i3189.10.1136/bmj.i3189  
33  
34 44. Staerk L, Gerds TA, Lip GYH, et al. Standard and reduced doses of dabigatran, rivaroxaban and  
35 apixaban for stroke prevention in atrial fibrillation: a nationwide cohort study. *J Intern Med*. 2018;283(1):45-  
36  
37 55.10.1111/joim.12683  
38  
39 45. Chan YH, Kuo CT, Yeh YH, et al. Thromboembolic, Bleeding, and Mortality Risks of Rivaroxaban and  
40 Dabigatran in Asians With Nonvalvular Atrial Fibrillation. *J Am Coll Cardiol*. 2016;68(13):1389-  
41  
42 401.10.1016/j.jacc.2016.06.062  
43  
44 46. Chan YH, See LC, Tu HT, et al. Efficacy and Safety of Apixaban, Dabigatran, Rivaroxaban, and Warfarin  
45 in Asians With Nonvalvular Atrial Fibrillation. *J Am Heart Assoc*. 2018;7(8).10.1161/jaha.117.008150  
46  
47 47. Lai CL, Chen HM, Liao MT, et al. Comparative Effectiveness and Safety of Dabigatran and Rivaroxaban  
48 in Atrial Fibrillation Patients. *J Am Heart Assoc*. 2017;6(4).10.1161/jaha.116.005362  
49  
50 48. Meng SW, Lin TT, Liao MT, et al. Direct Comparison of Low-Dose Dabigatran and Rivaroxaban for  
51 Effectiveness and Safety in Patients with Non-Valvular Atrial Fibrillation. *Acta Cardiol Sin*. 2019;35(1):42-  
52  
53 54.10.6515/acs.201901\_35(1).20180817a  
54  
55  
56  
57  
58  
59  
60

- 1  
2  
3 49. Blin PD-PCCYBJMPAALRDCMN. Comparative Effectiveness and Safety of Standard or Reduced Dose  
4 Dabigatran vs. Rivaroxaban in Nonvalvular Atrial Fibrillation. *Clin Pharm Therapeutics*. 2019;105(6):1439-  
5 55.10.1002/cpt.1318  
6  
7  
8 50. Al-Khalili F, Lindstrom C, Benson L. The safety and persistence of non-vitamin-K-antagonist oral  
9 anticoagulants in atrial fibrillation patients treated in a well structured atrial fibrillation clinic. *Curr Med Res Opin*.  
10 2016;32(4):779-85.10.1185/03007995.2016.1142432  
11  
12  
13 51. Mueller T, Alvarez-Madrado S, Robertson C, et al. Comparative safety and effectiveness of direct oral  
14 anticoagulants in patients with atrial fibrillation in clinical practice in Scotland. *Br J Clin Pharmacol*.  
15 2019;85(2):422-31.10.1111/bcp.13814  
16  
17  
18 52. Vinogradova Y, Coupland C, Hill T, et al. Risks and benefits of direct oral anticoagulants versus warfarin  
19 in a real world setting: cohort study in primary care. *BMJ*. 2018;362:k2505.10.1136/bmj.k2505  
20  
21  
22 53. Cerda M, Cerezo-Manchado JJ, Johansson E, et al. Facing real-life with direct oral anticoagulants in  
23 patients with nonvalvular atrial fibrillation: outcomes from the first observational and prospective study in a  
24 Spanish population. *J Comp Eff Res*. 2019;8(3):165-78.10.2217/cer-2018-0134  
25  
26  
27 54. Li WH, Huang D, Chiang CE, et al. Efficacy and safety of dabigatran, rivaroxaban, and warfarin for stroke  
28 prevention in Chinese patients with atrial fibrillation: the Hong Kong Atrial Fibrillation Project. *Clin Cardiol*.  
29 2017;40(4):222-9.10.1002/clc.22649  
30  
31  
32 55. <https://clincalc.com/stats/samplesize.aspx> [accessed May 2020]  
33  
34 56. Ho DE, Imai K, King G, et al. Matching as nonparametric preprocessing for reducing model dependence  
35 in parametric causal inference. *Political Analysis*. 2007;15:199-236  
36  
37 57. Bohula EA, Giugliano RP, Ruff CT, et al. Impact of Renal Function on Outcomes With Edoxaban in the  
38 ENGAGE AF-TIMI 48 Trial. *Circulation*. 2016;134(1):24-36.10.1161/circulationaha.116.022361  
39  
40  
41 58. Austin PC, Stuart EA. Estimating the effect of treatment on binary outcomes using full matching on the  
42 propensity score. *Stat Methods Med Res*. 2017;26(6):2505-25.10.1177/0962280215601134  
43  
44 59. Zhu J, Alexander GC, Nazarian S, et al. Trends and Variation in Oral Anticoagulant Choice in Patients  
45 with Atrial Fibrillation, 2010-2017. *Pharmacotherapy*. 2018;38(9):907-20.10.1002/phar.2158  
46  
47  
48 60. Loo SY, Dell'Aniello S, Huiart L, et al. Trends in the prescription of novel oral anticoagulants in UK  
49 primary care. *Br J Clin Pharmacol*. 2017;83(9):2096-106.10.1111/bcp.13299  
50  
51 61. Hastrup SB, Hellfritsch M, Rasmussen L, et al. Use of Non-Vitamin K Antagonist Oral Anticoagulants  
52 2008-2016: A Danish Nationwide Cohort Study. *Basic Clin Pharmacol Toxicol*. 2018;123(4):452-  
53 63.10.1111/bcpt.13024  
54  
55  
56 62. Vaanholt MCW, Weernink MGM, von Birgelen C, et al. Perceived advantages and disadvantages of oral  
57 anticoagulants, and the trade-offs patients make in choosing anticoagulant therapy and adhering to their drug  
58 regimen. *Patient Educ Couns*. 2018;101(11):1982-9.10.1016/j.pec.2018.06.019  
59  
60



1  
2  
3  
4  
5  
6  
7  
8  
9  
10  
11  
12  
13  
14  
15  
16  
17  
18  
19  
20  
21  
22  
23  
24  
25  
26  
27  
28  
29  
30  
31  
32  
33  
34  
35  
36  
37  
38  
39  
40  
41  
42  
43  
44  
45  
46  
47  
48  
49  
50  
51  
52  
53  
54  
55  
56  
57  
58  
59  
60

For peer review only

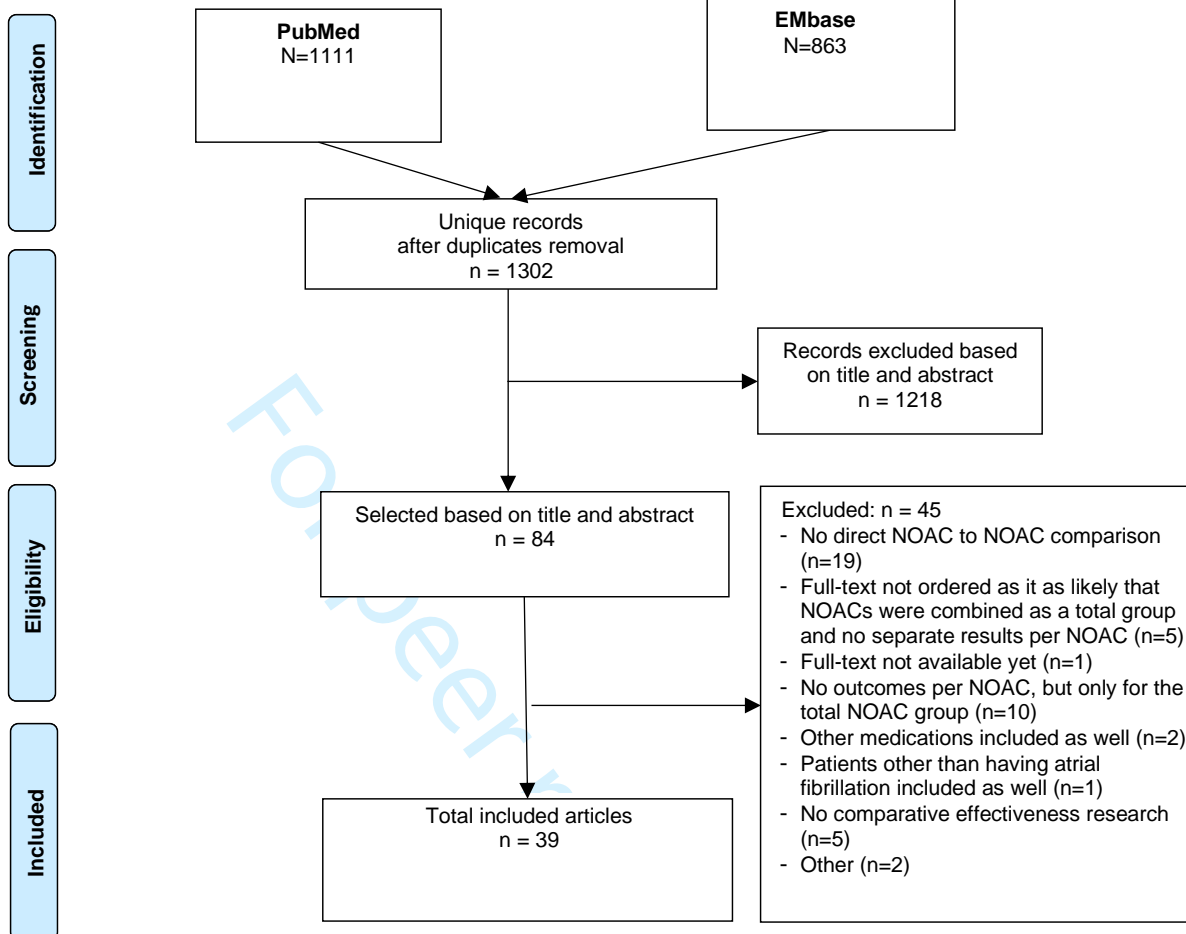

The following search string was used for PubMed, and adapted for Cochrane and EMBase.

**#1. NOAC**

direct oral anticoagulant\*[tiab] OR direct oral anti-coagulant\*[tiab] OR direct oral anticoagulation[tiab] OR direct oral anti-coagulation[tiab] OR direct-acting oral anticoagulant\*[tiab] OR direct-acting oral anti-coagulant\*[tiab] OR direct-acting oral anticoagulation[tiab] OR direct-acting oral anti-coagulation[tiab] OR DOAC[tiab] OR novel oral anticoagulant\*[tiab] OR novel oral anti-coagulant\*[tiab] OR Novel oral anticoagulation[tiab] OR Novel oral anti-coagulation[tiab] OR NOAC[tiab] OR Rivaroxaban[tiab] OR Apixaban[tiab] OR Edoxaban[tiab] OR Dabigatran[tiab] OR "Non VKA Oral Anticoagulant"[tiab] OR "Non Vitamin K Antagonist Oral Anticoagulant"[tiab]

**#2. Comparative effectiveness studies**

comparative effectiveness research[mesh] OR comparative effectiveness[tiab] OR real-world[tiab] OR real-life[tiab] OR cohort studies[mesh] OR cohort[tiab]

**#3. Atrial fibrillation**

atrial fibrillation[tiab]

**Limits:**

Language: English

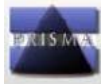

# PRISMA 2009 Checklist

1  
2  
3  
4  
5  
6  
7  
8  
9  
10  
11  
12  
13  
14  
15  
16  
17  
18  
19  
20  
21  
22  
23  
24  
25  
26  
27  
28  
29  
30  
31  
32  
33  
34  
35  
36  
37  
38  
39  
40  
41  
42  
43  
44  
45  
46  
47

| Section/topic                      | #  | Checklist item                                                                                                                                                                                                                                                                                              | Reported on page # |
|------------------------------------|----|-------------------------------------------------------------------------------------------------------------------------------------------------------------------------------------------------------------------------------------------------------------------------------------------------------------|--------------------|
| <b>TITLE</b>                       |    |                                                                                                                                                                                                                                                                                                             |                    |
| Title                              | 1  | Identify the report as a systematic review, meta-analysis, or both.                                                                                                                                                                                                                                         | 1                  |
| <b>ABSTRACT</b>                    |    |                                                                                                                                                                                                                                                                                                             |                    |
| Structured summary                 | 2  | Provide a structured summary including, as applicable: background; objectives; data sources; study eligibility criteria, participants, and interventions; study appraisal and synthesis methods; results; limitations; conclusions and implications of key findings; systematic review registration number. | 2                  |
| <b>INTRODUCTION</b>                |    |                                                                                                                                                                                                                                                                                                             |                    |
| Rationale                          | 3  | Describe the rationale for the review in the context of what is already known.                                                                                                                                                                                                                              | 3,4                |
| Objectives                         | 4  | Provide an explicit statement of questions being addressed with reference to participants, interventions, comparisons, outcomes, and study design (PICOS).                                                                                                                                                  | 4                  |
| <b>METHODS</b>                     |    |                                                                                                                                                                                                                                                                                                             |                    |
| Protocol and registration          | 5  | Indicate if a review protocol exists, if and where it can be accessed (e.g., Web address), and, if available, provide registration information including registration number.                                                                                                                               | NA                 |
| Eligibility criteria               | 6  | Specify study characteristics (e.g., PICOS, length of follow-up) and report characteristics (e.g., years considered, language, publication status) used as criteria for eligibility, giving rationale.                                                                                                      | 5,6                |
| Information sources                | 7  | Describe all information sources (e.g., databases with dates of coverage, contact with study authors to identify additional studies) in the search and date last searched.                                                                                                                                  | 5,6                |
| Search                             | 8  | Present full electronic search strategy for at least one database, including any limits used, such that it could be repeated.                                                                                                                                                                               | S1_Table           |
| Study selection                    | 9  | State the process for selecting studies (i.e., screening, eligibility, included in systematic review, and, if applicable, included in the meta-analysis).                                                                                                                                                   | 5                  |
| Data collection process            | 10 | Describe method of data extraction from reports (e.g., piloted forms, independently, in duplicate) and any processes for obtaining and confirming data from investigators.                                                                                                                                  | 5                  |
| Data items                         | 11 | List and define all variables for which data were sought (e.g., PICOS, funding sources) and any assumptions and simplifications made.                                                                                                                                                                       | 5                  |
| Risk of bias in individual studies | 12 | Describe methods used for assessing risk of bias of individual studies (including specification of whether this was done at the study or outcome level), and how this information is to be used in any data synthesis.                                                                                      | 5,6                |
| Summary measures                   | 13 | State the principal summary measures (e.g., risk ratio, difference in means).                                                                                                                                                                                                                               | NA                 |
| Synthesis of results               | 14 | Describe the methods of handling data and combining results of studies, if done, including measures of consistency (e.g., I <sup>2</sup> ) for each meta-analysis.                                                                                                                                          | NA                 |

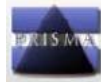

# PRISMA 2009 Checklist

Page 1 of 2

| Section/topic                 | #  | Checklist item                                                                                                                                                                                           | Reported on page # |
|-------------------------------|----|----------------------------------------------------------------------------------------------------------------------------------------------------------------------------------------------------------|--------------------|
| Risk of bias across studies   | 15 | Specify any assessment of risk of bias that may affect the cumulative evidence (e.g., publication bias, selective reporting within studies).                                                             | NA                 |
| Additional analyses           | 16 | Describe methods of additional analyses (e.g., sensitivity or subgroup analyses, meta-regression), if done, indicating which were pre-specified.                                                         | NA                 |
| <b>RESULTS</b>                |    |                                                                                                                                                                                                          |                    |
| Study selection               | 17 | Give numbers of studies screened, assessed for eligibility, and included in the review, with reasons for exclusions at each stage, ideally with a flow diagram.                                          | S2_Fig             |
| Study characteristics         | 18 | For each study, present characteristics for which data were extracted (e.g., study size, PICOS, follow-up period) and provide the citations.                                                             | 8-21               |
| Risk of bias within studies   | 19 | Present data on risk of bias of each study and, if available, any outcome level assessment (see item 12).                                                                                                | 8-27               |
| Results of individual studies | 20 | For all outcomes considered (benefits or harms), present, for each study: (a) simple summary data for each intervention group (b) effect estimates and confidence intervals, ideally with a forest plot. | NA                 |
| Synthesis of results          | 21 | Present results of each meta-analysis done, including confidence intervals and measures of consistency.                                                                                                  | NA                 |
| Risk of bias across studies   | 22 | Present results of any assessment of risk of bias across studies (see Item 15).                                                                                                                          | NA                 |
| Additional analysis           | 23 | Give results of additional analyses, if done (e.g., sensitivity or subgroup analyses, meta-regression [see Item 16]).                                                                                    | NA                 |
| <b>DISCUSSION</b>             |    |                                                                                                                                                                                                          |                    |
| Summary of evidence           | 24 | Summarize the main findings including the strength of evidence for each main outcome; consider their relevance to key groups (e.g., healthcare providers, users, and policy makers).                     | 30                 |
| Limitations                   | 25 | Discuss limitations at study and outcome level (e.g., risk of bias), and at review-level (e.g., incomplete retrieval of identified research, reporting bias).                                            | 30,31              |
| Conclusions                   | 26 | Provide a general interpretation of the results in the context of other evidence, and implications for future research.                                                                                  | 31,32              |
| <b>FUNDING</b>                |    |                                                                                                                                                                                                          |                    |
| Funding                       | 27 | Describe sources of funding for the systematic review and other support (e.g., supply of data); role of funders for the systematic review.                                                               |                    |

From: Moher D, Liberati A, Tetzlaff J, Altman DG, The PRISMA Group (2009). Preferred Reporting Items for Systematic Reviews and Meta-Analyses: The PRISMA Statement. PLoS Med 6(7): e1000097. doi:10.1371/journal.pmed1000097

For more information, visit: [www.prisma-statement.org](http://www.prisma-statement.org).

Page 2 of 2

For peer review only - <http://bmjopen.bmj.com/site/about/guidelines.xhtml>

# BMJ Open

## CRITICAL APPRAISAL AND ISSUES REGARDING GENERALISABILITY OF COMPARATIVE EFFECTIVENESS STUDIES OF NOACS IN ATRIAL FIBRILLATION AND THEIR RELATION TO CLINICAL TRIAL DATA - A SYSTEMATIC REVIEW

|                                 |                                                                                                                                                                                                                                                                                                                |
|---------------------------------|----------------------------------------------------------------------------------------------------------------------------------------------------------------------------------------------------------------------------------------------------------------------------------------------------------------|
| Journal:                        | <i>BMJ Open</i>                                                                                                                                                                                                                                                                                                |
| Manuscript ID                   | bmjopen-2020-042024.R1                                                                                                                                                                                                                                                                                         |
| Article Type:                   | Original research                                                                                                                                                                                                                                                                                              |
| Date Submitted by the Author:   | 14-Jan-2021                                                                                                                                                                                                                                                                                                    |
| Complete List of Authors:       | Bunge, Eveline; Pallas Health Research and Consultancy<br>van Hout, Ben; University of Sheffield, HEDS, SchARR<br>Haas, Sylvia ; Formerly Technical University Of Munich<br>Spentzouris, Georgios; Daiichi Sankyo Europe GmbH<br>Cohen, Alexander; Guys and St Thomas' NHS Foundation Trust, King's<br>College |
| <b>Primary Subject Heading</b>: | Cardiovascular medicine                                                                                                                                                                                                                                                                                        |
| Secondary Subject Heading:      | Research methods                                                                                                                                                                                                                                                                                               |
| Keywords:                       | Adult cardiology < CARDIOLOGY, STATISTICS & RESEARCH METHODS,<br>Cardiology < INTERNAL MEDICINE                                                                                                                                                                                                                |
|                                 |                                                                                                                                                                                                                                                                                                                |

SCHOLARONE™  
Manuscripts



I, the Submitting Author has the right to grant and does grant on behalf of all authors of the Work (as defined in the below author licence), an exclusive licence and/or a non-exclusive licence for contributions from authors who are: i) UK Crown employees; ii) where BMJ has agreed a CC-BY licence shall apply, and/or iii) in accordance with the terms applicable for US Federal Government officers or employees acting as part of their official duties; on a worldwide, perpetual, irrevocable, royalty-free basis to BMJ Publishing Group Ltd ("BMJ") its licensees and where the relevant Journal is co-owned by BMJ to the co-owners of the Journal, to publish the Work in this journal and any other BMJ products and to exploit all rights, as set out in our [licence](#).

The Submitting Author accepts and understands that any supply made under these terms is made by BMJ to the Submitting Author unless you are acting as an employee on behalf of your employer or a postgraduate student of an affiliated institution which is paying any applicable article publishing charge ("APC") for Open Access articles. Where the Submitting Author wishes to make the Work available on an Open Access basis (and intends to pay the relevant APC), the terms of reuse of such Open Access shall be governed by a Creative Commons licence – details of these licences and which [Creative Commons](#) licence will apply to this Work are set out in our licence referred to above.

Other than as permitted in any relevant BMJ Author's Self Archiving Policies, I confirm this Work has not been accepted for publication elsewhere, is not being considered for publication elsewhere and does not duplicate material already published. I confirm all authors consent to publication of this Work and authorise the granting of this licence.

1  
2  
3 **CRITICAL APPRAISAL AND ISSUES REGARDING GENERALISABILITY OF COMPARATIVE**  
4 **EFFECTIVENESS STUDIES OF NOACS IN ATRIAL FIBRILLATION AND THEIR RELATION TO CLINICAL**  
5 **TRIAL DATA - A SYSTEMATIC REVIEW**  
6  
7  
8  
9

10 **Eveline M. Bunge<sup>1</sup>, Ben van Hout<sup>2</sup>, Sylvia Haas<sup>3</sup>, Georgios Spentzouris<sup>4</sup>, Alexander T. Cohen<sup>5</sup>**  
11

12  
13 <sup>1</sup> Pallas, health research and consultancy BV, P.O. Box 21238, 3001 AE Rotterdam, the Netherlands  
14

15  
16 <sup>2</sup> University of Sheffield, HEDS, ScHARR, Sheffield, UK  
17

18  
19 <sup>3</sup> Formerly Technical University of Munich, Munich, Germany  
20

21  
22 <sup>4</sup> Daiichi Sankyo Europe, Munich, Germany  
23

24  
25 <sup>5</sup> Guys and St Thomas' NHS Foundation Trust, King's College London, London, UK  
26

27 \* Corresponding author:  
28

29 bunge@pallashrc.com  
30

31 Word count: 4406  
32  
33  
34  
35  
36  
37  
38  
39  
40  
41  
42  
43  
44  
45  
46  
47  
48  
49  
50  
51  
52  
53  
54  
55  
56  
57  
58  
59  
60



1  
2  
3 **KEY WORDS**

4 atrial fibrillation; non-vitamin K antagonist oral anticoagulants (NOAC); comparative effectiveness research;  
5  
6 systematic review  
7  
8  
9  
10  
11  
12  
13  
14  
15  
16  
17  
18  
19  
20  
21  
22  
23  
24  
25  
26  
27  
28  
29  
30  
31  
32  
33  
34  
35  
36  
37  
38  
39  
40  
41  
42  
43  
44  
45  
46  
47  
48  
49  
50  
51  
52  
53  
54  
55  
56  
57  
58  
59  
60

For peer review only

**ABSTRACT**

**Objective:** To critically appraise the published comparative effectiveness studies on non-vitamin K antagonist oral anticoagulants (NOAC) in nonvalvular atrial fibrillation (NVAf). Results were compared with expectations formulated on the basis of trial results with specific attention to the patient years in each study.

**Methods:** All studies that compared the effectiveness or safety between at least two NOACs in patients with NVAf were eligible. We performed a systematic literature review in Medline and EMbase to investigate the way comparisons between NOACs were made, search date 23-04-2019. Critical appraisal of the studies was done using amongst other ISPOR checklists for comparative effectiveness research

**Results:** We included 39 studies in which direct comparison between at least two NOACs were made. Almost all studies concerned patient registries, pharmacy or prescription databases and/or health insurance database studies using a cohort design. Corrections for differences in patient characteristics was applied in all but two studies. Eighteen studies matched using propensity scores, eight studies weighted patients based on the inverse probability of treatment, one study used propensity score stratification and ten studies applied a proportional hazards model. These studies have some important limitations regarding unmeasured confounders and channelling bias, even though the larger part of the studies were well conducted technically. On the basis of trial results, expected differences are small and a naïve analysis suggests trials with between 7,700 and 59,500 patients are needed to confirm the observed differences in bleedings and between 51,800 and 7,994,300 to confirm differences in efficacy.

**Discussion:** Comparisons regarding effectiveness and safety between NOACs on the basis of observational data, even after correction for baseline characteristics, may not be reliable due to unmeasured confounders, channelling bias and insufficient sample size. These limitations should be kept in mind when results of these studies are used to decide on ranking NOAC treatment options.

**STRENGTHS AND LIMITATIONS OF THIS STUDY**

- To our knowledge, this is the first systematic review that critically appraised the quality and generalisability of the comparative effectiveness studies on NOACs in atrial fibrillation patients and to relate this to clinical trial data
- A naïve trial analysis was conducted to estimate the number of patients needed in a randomised clinical trial to confirm the differences in efficacy and bleeding.
- Thirty-nine articles were included of which only one included all four NOACs.

For peer review only

## INTRODUCTION

Guidelines state a preference for non-vitamin K antagonist oral anticoagulants (NOACs) above vitamin K antagonists (VKA) in patients with nonvalvular atrial fibrillation (NVAF) requiring prevention of stroke and systemic embolism.[1, 2] However, no recommendation for a specific NOAC is made in these guidelines, and in daily practice, physicians have to make a choice which of the four available NOACs (dabigatran, rivaroxaban, apixaban, edoxaban) they prescribe for a particular patient.[3-6]

In the absence of head-to-head trials, comparative effectiveness research (CER) has been conducted to compare the NOACs with regard to effectiveness and safety. This is also described as real-world evidence; i.e. the data will come from patients treated in daily practice. Comparisons on effectiveness and safety between NOACs are however not easy to make, as patients will not be prescribed one of the NOACs at random. The choice of a certain NOAC for a patient will at least partly be driven by patient characteristics, such as age, concomitant medications, and the risk of stroke and/or bleeding. This can lead to systematic differences between the treatment groups, which is known as channeling bias. [7] In order to make a valid comparison on effectiveness and safety between the NOACs, adjusting for these characteristics is necessary when these characteristics are also related to the outcome (confounding variables).

Several techniques exist to correct for imbalances in risks, but there is no gold standard and all methods have advantages and disadvantages. Cox proportional hazards (Cox PH) regression model adjustment can be used but large sample sizes are needed when number of events is relatively low and the number of covariates is high (as a rule of thumb, about 10 events per predictor variable [8]) and these large sample sizes are not always available. Event rates are low, around 1 per 100 patient years for efficacy outcomes and to detect differences, even in a randomized clinical trial, one needs substantial numbers of patients. This number would only increase when the results are contaminated by a lack of balance between the patients groups. Another method to adjust for confounding is using propensity scores (PS) to create comparable patient groups before the analysis. A propensity score is the probability of an individual receiving a specific treatment given a specific set of patient characteristics (e.g. age, gender, comorbidities).[9] Variables related to the outcome should be included in the propensity score despite their strength of association on treatment (exposure) selection. This will increase the precision of the estimated exposure effect, while bias will not be increased. Variables that are related to the exposure but not the outcome will decrease the precision of the estimated exposure effect without decreasing bias.[10] Adjustment for confounding using PS can be done by matching the treatment groups on the PS, by weighing treatment groups based on the PS inverse probability of treatment weighting (IPTW), by PS stratification, or by covariate adjustment using the PS.[9, 11] Well conducted PS methods will lead to treatment groups that are very well comparable regarding important confounders, which increases the confidence in the

1  
2  
3 results, however, there are also some disadvantages. For instance, in PS matching studies, patients who cannot  
4 be matched to another patient will be excluded from the analyses, and in IPTW, when patients on one treatment  
5 have a low propensity score and patients treated with the other treatment have a high propensity score, extreme  
6 weights can occur which can bias the results.[12]  
7  
8  
9

10  
11 To gain more understanding in how the above described methodologies were applied in peer-reviewed CER on  
12 effectiveness and safety in NOACs in NVAf patients, we conducted a systematic literature review. Within this we  
13 compare the results with those from a naïve analysis of the results of the four major trial for rivaroxaban,  
14 apixaban, dabigatran and edoxaban, and compare the results from the various analyses with those from the trials.  
15  
16  
17  
18  
19  
20  
21  
22  
23  
24  
25  
26  
27  
28  
29  
30  
31  
32  
33  
34  
35  
36  
37  
38  
39  
40  
41  
42  
43  
44  
45  
46  
47  
48  
49  
50  
51  
52  
53  
54  
55  
56  
57  
58  
59  
60

For peer review only

## METHODS

### Information sources, search strategy and eligibility criteria

We performed a systematic literature review to identify peer-reviewed comparative effectiveness research on NOACs in patients with atrial fibrillation. A search in Medline (access through PubMed) and EMBase was performed combining search strings on NOAC, VKA and atrial fibrillation (see appendix 1 for the search strings). The search was conducted on 23-04-2019 and we checked all articles published in English language. The title and abstract selection was done in duplicate by two independent researchers.

The following inclusion criteria were used:

- Population: patients with NVAF
- Intervention: NOAC (dabigatran, rivaroxaban, apixaban or edoxaban)
- Comparator: other NOAC(s) (dabigatran, rivaroxaban, apixaban and/or edoxaban)
- Outcomes: effectiveness and safety
- Study type: comparative effectiveness studies with a cohort design

The following exclusion criteria were applied:

- Studies on only one NOAC
- Studies in which VKA is the comparator for the NOACs, and NOACs are not compared against each other
- Studies on cost-effectiveness and healthcare resources use
- Studies on adherence or persistence

### Critical appraisal

We checked the setting, in- and exclusion criteria and the following baseline characteristics: age, proportion males, CHA2DS2Vasc score and comorbidity index.

We used the criteria suggested by ISPOR, Yao et al., and Austin et al. as a guidance to critically appraise the articles in which PS were used.[12-15] The criteria we checked concerned:

- The variables included in the propensity score model
- Explanation of the variable selection procedure for propensity score model
- Distribution of baseline characteristics for each group before propensity score analysis
- In case of PSM:
  - matching ratio,
  - distance metric,

- with or without replacement,
- comparability of baseline characteristics in the matched groups,
- sample size before and after matching
- In case of IPTW:
  - comparability of baseline characteristics in the weighted groups
  - extreme weights
- In case of PS stratification:
  - number of strata, comparability of baseline characteristics
- In case of analyses in which no PS was used in the main analyses:
  - we evaluated whether the ratio number of covariates to the number of events seemed sufficient to produce valid results.[8]
- Sensitivity analyses to further explore the magnitude of residual confounding (i.e. case-crossover study designs; clinical details in a subsample; proxy measures; or instrumental variable (IV) techniques)

### **Naïve trial analysis**

Trials are quite often designed with a null hypothesis and associated with a power calculation while real world studies are often dictated by the number of observations available. To give the results from the real-world-evidence some perspective we undertook a naïve trial analysis in which the risk reductions from each trial with respect to efficacy and safety outcomes were applied to an average number of outcomes observed in the warfarin arms in each trial. This leads to an estimate of the relevant rates for each drug and the differences are illustrated by the number of patients (sample size) needed in a randomised clinical trial to confirm the estimated differences.

**RESULTS**

In total, we found 1302 unique articles in our search, of which 39 articles fulfilled the in- and exclusion criteria and were included for data extraction, see figure 1. In table 1 to 5, study characteristics are presented. The most important differences between the studies are outlined in table 6.

For peer review only



Table 1. Characteristics of the included articles that used propensity score matching (PSM) as primary analyses (n=18)

| Author and country                          | Setting and study period                                                                             | Study population                                                                                                                                                                                                | Patient characteristics before PSM (range between NOACs)                              | Primary outcome definition                                                                                                                                                                                                                                                                                                                                            | PSM details                                                                                                                                                                                          | Sample size before matching                                         | Sample size after matching                                                                                                                                               | Results/conclusion as reported in the article                                                                                                                                                                                                                    |
|---------------------------------------------|------------------------------------------------------------------------------------------------------|-----------------------------------------------------------------------------------------------------------------------------------------------------------------------------------------------------------------|---------------------------------------------------------------------------------------|-----------------------------------------------------------------------------------------------------------------------------------------------------------------------------------------------------------------------------------------------------------------------------------------------------------------------------------------------------------------------|------------------------------------------------------------------------------------------------------------------------------------------------------------------------------------------------------|---------------------------------------------------------------------|--------------------------------------------------------------------------------------------------------------------------------------------------------------------------|------------------------------------------------------------------------------------------------------------------------------------------------------------------------------------------------------------------------------------------------------------------|
| Abraham, 2017<br>USA                        | OptumLabs Data Warehouse<br>Oct 1, 2010 through Feb 28, 2015                                         | NVAF patients, 18 years of age or older, identified by their index prescription of a NOAC during study period (excluded if NOAC prescribed during 12 months before index date). No reporting on earlier VKA use | Age: 69.2±11.6-72.2±11.1<br>Male: 54.0-60.5%<br>CHA2DS2-VASc: 3.2-4.0<br>CDI: 2.3-2.7 | Gastrointestinal bleeding: definition by Lewis et al. 2002 using inpatient hospital claims for relevant primary and secondary discharge diagnoses.                                                                                                                                                                                                                    | 3 matched cohorts; 1:1 PSM without replacement and with a caliper of 0.01; After PSM, standardized differences of all baseline characteristics were <10%.                                            | rivaroxaban: n=19,301<br>dabigatran: n=17,426<br>apixaban: n=6,576  | rivaroxaban vs. dabigatran: n=31,574<br>apixaban vs. rivaroxaban: n=13,130<br>apixaban vs. dabigatran: n=13,084<br><br>(more than 90% of original smallest samples size) | Apixaban had the most favorable gastrointestinal bleeding profile and rivaroxaban had the least favorable safety profile. Apixaban had the most favorable gastrointestinal safety profile among all age groups.                                                  |
| Amin, 2018 (J Manag Care Spec Pharm)<br>USA | Medicare & Medicaid Services<br>Jan 1, 2012, to Dec 31, 2014                                         | NVAF patients of at least 65 years old, OAC treatment-naïve, ≥ 1 prescription claim for OAC during study period. Excluded if OAC pharmacy claim during the 12-month before study start.                         | Age: 77.2±7.0-78.4±7.4<br>Male: 47.4-50.6%<br>CHA2DS2-VASc: 4.4-4.6<br>CCI: 2.5-2.7   | Hospitalization for stroke, systemic embolism and major bleeding: ICD-9-code as primary discharge diagnosis                                                                                                                                                                                                                                                           | 2 matched cohorts; 1:1 PSM with nearest neighbour without replacement and with a caliper of 0.01; After PSM, standardized differences of all baseline characteristics were <10%.                     | rivaroxaban: n=53,146<br>apixaban: n=20,853<br>dabigatran: n=16,743 | rivaroxaban vs. apixaban: n=41,608<br>dabigatran vs. apixaban: n=30,836<br><br>(more than 90% of original smallest samples size)                                         | Apixaban was associated with significantly lower risks of all-cause, stroke/SE-related, and MB-related hospitalizations compared with dabigatran, and rivaroxaban                                                                                                |
| Amin 2018 (J Med Econ)<br>USA               | OptumInsight research database<br>Jan 1, 2012 – Sept 30, 2015                                        | NVAF patients of at least 18 years old, OAC treatment-naïve, ≥ 1 prescription claim for OAC during study period. Excluded if OAC pharmacy claim during the 12-month before study start.                         | NR                                                                                    | Hospitalization for stroke, systemic embolism and major bleeding: ICD-9-code as primary discharge diagnosis                                                                                                                                                                                                                                                           | 2 matched cohorts; 1:1 PSM with nearest neighbour without replacement and with a caliper of 0.01; After PSM, standardized differences of all baseline characteristics were <10%.                     | rivaroxaban: n=14,163<br>apixaban: n=8,652<br>dabigatran: n=3,684   | apixaban vs. rivaroxaban: N=16,880<br>apixaban vs. dabigatran: N=7,114<br><br>(more than 90% of original smallest samples size)                                          | Rivaroxaban patients were associated with a significantly higher risk of all-cause and major bleeding related hospitalisations and dabigatran patients were associated with a significantly higher risk of major bleeding hospitalisation compared with apixaban |
| Andersen, 2018<br>Denmark                   | National patient register, Register of Medicinal Product Statistics<br>July 1, 2013 – March 31, 2016 | NVAF patients who were new users of NOAC aged 45 years of age or older, with a recent diagnosis of NVAF (received no OAC treatment in the 12 months before inclusion; 'recent diagnosis' is not defined)        | Online material not available                                                         | Stroke, systemic embolism and major bleeding (i.e, intracranial bleeding, gastro-intestinal bleeding (bleeding ulcer, hematemesis or melena) or other serious bleeding (anemia caused by bleeding, bleeding of unknown origin, bleeding of the respiratory or urinary tract, peritoneal, retinal or orbital bleeding): hospital admission with a primary or secondary | 3 matched cohorts; 1:1 PSM with nearest neighbour with a caliper of 0. (replacement yes or no not reported) All baseline characteristics were well balanced after matching, except for calendar year | apixaban: n=4,292<br>dabigatran: n=3,913<br>rivaroxaban: n=3,805    | apixaban vs. rivaroxaban: N=7,352<br>apixaban vs. dabigatran: N=6,470<br>rivaroxaban vs. dabigatran: N=5,440                                                             | There were no statistically significant differences in risk of stroke or systemic embolism or major bleeding in propensity-matched comparisons between apixaban, dabigatran, and rivaroxaban used in standard doses.                                             |

| Author and country       | Setting and study period                                                                                    | Study population                                                                                                                                                      | Patient characteristics before PSM (range between NOACs)                                                  | Primary outcome definition                                                                                                                                                                                                                                                                      | PSM details                                                                                                                                                                            | Sample size before matching                                        | Sample size after matching                                              | Results/conclusion as reported in the article                                                                                                                                                                                                                                                        |
|--------------------------|-------------------------------------------------------------------------------------------------------------|-----------------------------------------------------------------------------------------------------------------------------------------------------------------------|-----------------------------------------------------------------------------------------------------------|-------------------------------------------------------------------------------------------------------------------------------------------------------------------------------------------------------------------------------------------------------------------------------------------------|----------------------------------------------------------------------------------------------------------------------------------------------------------------------------------------|--------------------------------------------------------------------|-------------------------------------------------------------------------|------------------------------------------------------------------------------------------------------------------------------------------------------------------------------------------------------------------------------------------------------------------------------------------------------|
| Blin, 2019<br>France     | French nationwide claims and hospitalization database, Système National des Données de Santé<br>2013 – 2015 | NVAF patients of at least 18 years old, all new users of standard or reduced doses of NOAC in (received no OAC treatment in the three years before the index date)    | Age: 65.3±10.2-69.0±11.1<br>Male: 62.7-68.3%<br>Modified CHA2DS2-VASc ≥2: 57.1-67.4%<br>Comorbidities: NR | Hospitalization with a main diagnosis of ischemic stroke or systemic embolism or major bleeding and all-cause death. (ICD-10) codes                                                                                                                                                             | 1 matched cohort PSM method not reported. After PSM, standardized differences of all baseline characteristics were <10%.                                                               | rivaroxaban: n=18,829<br>dabigatran: n=10,847                      | dabigatran vs. rivaroxaban: n=16,580                                    | Dabigatran had similar or better effectiveness than rivaroxaban but lower bleeding risk. Death rates were not different.                                                                                                                                                                             |
| Briasoulis, 2018<br>USA  | Medicare and Medicaid Services<br>Jan 1, 2010 - Dec 31, 2013                                                | NVAF patients newly diagnosed of ≥65 years old and initiated OAC treatment during study period                                                                        | Age: 75.4±6–75.5±6<br>Male: 50-53%<br>CHA2DS2-VASc: 4.1-4.1<br>Gagne: 2.7-2.7                             | All-cause mortality, stroke, including ischemic stroke or transient ischemic attack, gastrointestinal bleeding, any bleeding, non-gastrointestinal bleeding, acute myocardial infarction. ICD-9-CM reported in inpatient claims, whether primary and secondary codes were used is not described | 1 matched cohort; 3-way propensity matching (VKA was one of the groups, but not further discussed here) After PSM, standardized differences of all baseline characteristics were <10%. | rivaroxaban: n=14,257<br>dabigatran: n=13,522                      | dabigatran vs. rivaroxaban: n =26,814                                   | Rivaroxaban was associated with higher gastrointestinal bleeding rates than dabigatran                                                                                                                                                                                                               |
| Deitelzweig, 2017<br>USA | Humana Research Database (Medicare coverage)<br>Jan 2013 - 30 Sept 2015                                     | NVAF patients age of ≥65 years, OAC treatment naïve (excluded if they had a pharmacy claim for OAC during the baseline period, which was 12 months before index date) | Age: 76.8±8.3-78.0±9.0<br>Male: 51.5-55.1%<br>CHA2DS2-VASc: 4.3- 4.6<br>CCI: 2.7-3.0                      | Hospitalisation claims of stroke, systemic embolism and major bleeding: ICD-9-code as primary discharge diagnosis                                                                                                                                                                               | 2 matched cohorts; 1:1 PSM with nearest neighbour (replacement yes or no and calliper not reported) balanced with key patient characteristics not statistically different (p>.05).     | rivaroxaban: n=11,082<br>apixaban: n=8,250<br>dabigatran: n=2,474  | apixaban vs. rivaroxaban: n=13,620<br>apixaban vs. dabigatran: n= 4,654 | Apixaban is associated with significantly lower risk of stroke/systemic embolism and major bleeding than rivaroxaban, and a trend towards better outcomes vs. dabigatran.                                                                                                                            |
| Gupta, 2018<br>USA       | Department of Defence data<br>Jan 1, 2012, to Sept 30, 2015                                                 | NVAF patients, treatment-naïve (excluded if a pharmacy claim for an OAC during the baseline period)                                                                   | NR                                                                                                        | Inpatient claim of stroke, systemic embolism or major bleeding as primary or secondary diagnosis based on validated administrative claims-based algorithms                                                                                                                                      | 2 matched cohorts; 1:1 PSM with nearest neighbour without replacement with a calliper of 0.01 After PSM, standardized differences of all baseline characteristics were <10%.           | rivaroxaban: n=15,680<br>apixaban: n=11,754<br>dabigatran: n=4,312 | rivaroxaban vs. apixaban: n=22,568<br>dabigatran vs. apixaban: n=8,258  | Rivaroxaban was associated with a significantly higher risk of stroke/systemic embolism and major bleeding compared with apixaban. Dabigatran use was associated with a numerically higher risk of stroke/systemic embolism and a significantly higher risk of major bleeding compared with apixaban |

| Author and country                | Setting and study period                                                                                                                                                                    | Study population                                                                                                                    | Patient characteristics before PSM (range between NOACs)                                     | Primary outcome definition                                                                                   | PSM details                                                                                                                                                                          | Sample size before matching                                             | Sample size after matching                                                                                 | Results/conclusion as reported in the article                                                                                                                                                                                                                               |
|-----------------------------------|---------------------------------------------------------------------------------------------------------------------------------------------------------------------------------------------|-------------------------------------------------------------------------------------------------------------------------------------|----------------------------------------------------------------------------------------------|--------------------------------------------------------------------------------------------------------------|--------------------------------------------------------------------------------------------------------------------------------------------------------------------------------------|-------------------------------------------------------------------------|------------------------------------------------------------------------------------------------------------|-----------------------------------------------------------------------------------------------------------------------------------------------------------------------------------------------------------------------------------------------------------------------------|
| Lai, 2017<br>Taiwan               | National Health Insurance program<br>2011 to 2014                                                                                                                                           | NVAF and flutter patients, ≥20 years, new-users (new users not further defined).                                                    | Age: 75.1±9.7-75.4±9.6<br>Male: 54-7-56.7%<br>CHA2DS2-VASc: 3.3-3.3<br>Comorbidity index: NR | All-cause death                                                                                              | 1 matched cohort;<br>1:1 PSM with calliper < 0.2 (neighbour and replacement not reported)<br>Balance checked with p-values and standardized difference                               | dabigatran: n=10,625;<br>rivaroxaban: n=4,609                           | dabigatran vs. rivaroxaban: N=9,200                                                                        | Rivaroxaban therapy was associated with a statistically significant increase in all-cause death compared with dabigatran                                                                                                                                                    |
| Lin, 2017<br>USA                  | IMS Pharmetrics Plus database<br>Jan 2013 – Sept 2015                                                                                                                                       | NVAF patients of at least 18 years old who initiated OAC (received no OAC treatment received 12 months before the index date)       | NR                                                                                           | Major bleeding first listed in ICD-9 diagnosis or procedure codes                                            | 2 cohorts;<br>1:1 PSM with nearest neighbour (replacement and calliper not reported)<br>Patient key characteristic being similar with p>0.05                                         | NR                                                                      | apixaban vs. rivaroxaban: N=8,124<br>apixaban vs. dabigatran: N=5,368                                      | Apixaban is associated with reduced risk of hospitalisation compared with dabigatran and rivaroxaban.                                                                                                                                                                       |
| Lip, 2016 (Thromb Haemost)<br>USA | Truven MarketScan® Commercial Claims and Encounter and Medicare Supplemental and Coordination of Benefits Databases<br>Jan 2012 to Dec 2014                                                 | NVAF patients ≥18 years who newly initiated OACs (patients with a prescription claim for OAC prior to the index date were excluded) | Age: 66.5±12.4- 68.5±12.4<br>Male: 61.4-65.0%<br>CHA2DS2-VASc: 2.6-2.8<br>CDI: 1.6-1.8       | Major bleeding listed first primary ICD-9 code                                                               | 3 cohorts;<br>1: 1 PSM with nearest neighbour without replacement with a maximum calliper of 0.01.<br>After PSM, standardized differences of all baseline characteristics were <10%. | rivaroxaban: n=17,801<br>apixaban: n=7,438<br>dabigatran: n=4,661       | apixaban vs dabigatran: n=14,798<br>rivaroxaban vs dabigatran: n=9,314<br>apixaban vs rivaroxaban: n=8,814 | Compared to apixaban, rivaroxaban initiation was associated with significantly higher risk of major bleeding. The difference for dabigatran was not statistically significant                                                                                               |
| Lip, 2018<br>USA                  | Medicare and Medicaid Services Medicare; Truven MarketScan, IMS PharMetrics Plus Database, Optum Clinformatics Data Mart, and the Humana Research Database<br>Jan 1, 2013, to Sept 30, 2015 | NVAF patients newly prescribed OAC, (received no OAC treatment in the 12 months before the index date)                              | Age: 71.4±11.4- 73.1±11.6<br>Male: 55.0-59.6%<br>CHA2DS2-VASc: 3.3-3.6<br>CDI: 2.4-2.8       | Hospitalizations with stroke, systemic embolism or major bleeding as the principal or first-listed diagnosis | 3 cohorts<br>1:1 PSM with nearest neighbour without replacement with a maximum calliper of 0.01<br>After PSM, standardized differences of all baseline characteristics were <10%     | rivaroxaban: n= 103,477<br>apixaban: n= 63,484<br>dabigatran: n= 27,571 | apixaban-rivaroxaban: n=125,238<br>dabigatran-rivaroxaban: n=55,076<br>apixaban-dabigatran: n=54,192       | Apixaban was associated with a lower rate of stroke/systemic embolism and major bleeding compared with dabigatran and rivaroxaban. Dabigatran was associated with a lower rate of major bleeding compared with rivaroxaban, with similar rates of stroke/systemic embolism. |

| Author and country      | Setting and study period                                                                                                               | Study population                                                                                                                                      | Patient characteristics before PSM (range between NOACs)                                                                                     | Primary outcome definition                                                                                                                                                                                                                                                                                                                                              | PSM details                                                                                                                                                         | Sample size before matching                                         | Sample size after matching                                                                                      | Results/conclusion as reported in the article                                                                                                                                                               |
|-------------------------|----------------------------------------------------------------------------------------------------------------------------------------|-------------------------------------------------------------------------------------------------------------------------------------------------------|----------------------------------------------------------------------------------------------------------------------------------------------|-------------------------------------------------------------------------------------------------------------------------------------------------------------------------------------------------------------------------------------------------------------------------------------------------------------------------------------------------------------------------|---------------------------------------------------------------------------------------------------------------------------------------------------------------------|---------------------------------------------------------------------|-----------------------------------------------------------------------------------------------------------------|-------------------------------------------------------------------------------------------------------------------------------------------------------------------------------------------------------------|
| Lutsey, 2018<br>USA     | MarketScan Commercial Database<br>Jan 1, 2010 through Sept 30, 2015                                                                    | NVAF patients aged 45 and older with at least one prescription for OAC after their first AF claim (de novo patients or first initiation of treatment) | Age: 69.1±11.4-69.9 ± 11.7<br>Male: 59.4-63.7<br>CHA2DS2-VASC: 3.3-3.6<br>Comorbidity index: NR                                              | venous thromboembolism: at least one inpatient ICD 9 claim (first listed or not is not specified)                                                                                                                                                                                                                                                                       | 3 cohorts<br>1:1 PSM with a maximum caliper of 0.25 (neighbour and replacement not reported)<br>Balance not described                                               | rivaroxaban: n=31,119<br>dabigatran: n=28,089<br>apixaban: n=17,112 | rivaroxaban vs. apixaban: n=32,468<br>dabigatran vs. rivaroxaban: n=21,160<br>dabigatran vs. apixaban: n=6,200  | Risk of VTE was lowest among those prescribed apixaban and dabigatran                                                                                                                                       |
| Mentias, 2018<br>USA    | Medicare & Medicaid Services<br>Jan 1, 2010, to Dec 31, 2013                                                                           | NVAF patients, newly diagnosed who initiated an OAC within 90 days of diagnosis                                                                       | Age: 75.8±6.4-75.8±6.4<br>Male: 48.9-50.1%<br>CHA2DS2-VASC: 4.3-4.3<br>Gagne: 3.0-3.0                                                        | inpatient admission for acute ischemic stroke or major bleeding as defined by Rothendler <sup>6</sup> and Suh based on the primary ICD-9-CM diagnosis on inpatient standard analytical files claims for acute care stays.                                                                                                                                               | 1 cohort<br>3-way PSM. (VKA was one of the groups, but not further discussed here)<br>After PSM, standardized differences of all baseline characteristics were <10% | rivaroxaban: n=23,177<br>dabigatran: n=21,979                       | NR                                                                                                              | Rivaroxaban users had significantly higher major bleeding risk compared with dabigatran users in the medium and high comorbidity groups                                                                     |
| Norby, 2017<br>USA      | Truven Health MarketScan Commercial Claims and Encounters Database and the Medicare Supplemental and Coordination of Benefits Database | NVAF patients with at least one prescription of NOAC after their first AF claim (first prescription of OAC)                                           | Age: 67.2±12.0-68.1±12.3<br>Male: 60.6-62.7<br>CHA2DS2-VASC: 2.6-2.9<br>Comorbidity index: NR                                                | ischemic stroke (primary discharge), intracranial bleeding (primary discharge), myocardial infarction (1st or 2 <sup>nd</sup> position of an inpatient discharge diagnosis, and gastrointestinal bleeding (primary and secondary diagnoses, presence of transfusion codes, and presence/absence of trauma codes to exclude trauma-related bleeding based on ICD-9 codes | 1 cohort;<br>1:1 PSM, greedy matching technique with a caliper of 0.25                                                                                              | NR                                                                  | rivaroxaban vs dabigatran: n=16,957                                                                             | Endpoint rates were similar when comparing anticoagulant-naïve rivaroxaban and dabigatran initiators, with the exception of higher gastrointestinal bleeding risk in rivaroxaban users                      |
| Noseworthy, 2016<br>USA | Optum Labs Data Warehouse<br>Oct 1, 2010 - Feb 28, 2015                                                                                | NVAF patients ≥ 18 years, who were OAC users during study period.                                                                                     | NR                                                                                                                                           | inpatient admission for stroke or systemic embolism or major bleeding (ICD-9 codes in the primary or secondary diagnosis positions of inpatient claims)                                                                                                                                                                                                                 | 3 cohorts;<br>1:1 PSM without replacement and with a caliper of 0.01.<br>A standardized difference < 10% was considered acceptable                                  | NR                                                                  | rivaroxaban vs. dabigatran: n=31,574<br>apixaban vs. rivaroxaban: n=13,130<br>apixaban vs. dabigatran: n=13,084 | Dabigatran, rivaroxaban, and apixaban appear to have similar effectiveness, although apixaban may be associated with a lower bleeding risk and rivaroxaban may be associated with an elevated bleeding risk |
| Shantha, 2017<br>USA    | Medicare and Medicaid<br>Nov 1, 2011 - Dec 31, 2013                                                                                    | Newly diagnosed NVAF patients and initiated OAC use.                                                                                                  | Males:<br>Age: 74.7±5.9-74.9±6.<br>CHADS2-Vasc: 3.7-3.8<br>Gagne score: 2.9-2.9<br>Women:<br>Age: 76.6±6.6- 76.9±6.6<br>CHADS2-Vasc: 4.8-4.9 | inpatient admissions for acute ischemic stroke or major bleeding (primary ICD-9-CM diagnosis on inpatient standard analytical files claims for acute care stays)                                                                                                                                                                                                        | 1 cohort;<br>Three-way PSM (VKA was one of the groups, but not further discussed here)                                                                              | rivaroxaban: n=23,177<br>dabigatran: n=21,979                       | dabigatran vs. rivaroxaban: n= 37,298                                                                           | The reduced risk of ischemic stroke in patients taking rivaroxaban, compared with dabigatran, seems to be limited to men, whereas the higher risk of                                                        |

| Author and country    | Setting and study period                                                                                                                                                                                      | Study population                                                                                                                                                        | Patient characteristics before PSM (range between NOACs)                             | Primary outcome definition                                                                                  | PSM details                                                                                                                                       | Sample size before matching | Sample size after matching                                               | Results/conclusion as reported in the article                                                                                                                                                                                                  |
|-----------------------|---------------------------------------------------------------------------------------------------------------------------------------------------------------------------------------------------------------|-------------------------------------------------------------------------------------------------------------------------------------------------------------------------|--------------------------------------------------------------------------------------|-------------------------------------------------------------------------------------------------------------|---------------------------------------------------------------------------------------------------------------------------------------------------|-----------------------------|--------------------------------------------------------------------------|------------------------------------------------------------------------------------------------------------------------------------------------------------------------------------------------------------------------------------------------|
|                       |                                                                                                                                                                                                               |                                                                                                                                                                         | Gagne: 3.0-3.1                                                                       |                                                                                                             | A standardized difference < 10% was considered acceptable                                                                                         |                             |                                                                          | bleeding seems to be limited to women                                                                                                                                                                                                          |
| Villines, 2019<br>USA | US Department of Defence Military Health System database<br><br>1 July 2010 to 30 June 2016 for the dabigatran vs. rivaroxaban cohort, and 28 Dec 2011 to 30 June 2016 for the dabigatran vs. apixaban cohort | NVAF patients ≥18 years newly initiated on standard-dose NOAC (first initiation of treatment, AF diagnosis in the 12 months before the index date or on the index date) | Age (mean): 70.9-71.3<br>Male: 60-62%<br>CHA2DS2-VASc: 3.1-3.1<br>CCI score: 4.3-4.3 | Stroke or major bleeding, ICD-9 or 10 codes, whether primary and secondary codes were used is not described | 2 cohorts<br>1:1 PSM nearest neighbour with a calliper of 0.20 (replacement not reported).<br>Balanced if the absolute value of the STD was ≤10%. | NR                          | dabigatran vs. rivaroxaban: n=25,526<br>dabigatran vs. apixaban: n=9,604 | Dabigatran was associated with significantly lower major bleeding risk vs. rivaroxaban, and no significant difference in stroke risk. For dabigatran vs. apixaban, the reduced sample size limited the ability to draw definitive conclusions. |

Age: mean, SD unless stated otherwise; CCI: Charlson comorbidity index; CDI: Charlson-Deyo index; Gagne: Gagne comorbidity score;

For peer review only

**Table 2. Characteristics of the included articles that used inverse probability of treatment weighting as primary analyses (n=8)**

| Author and country     | Setting and study period                                                            | Study population                                                                                                                                                                      | Patient characteristics (range between NOACs)                                                                                          | Primary outcome definition                                                                                                                                                                                                                                                           | IPWT details                                                                                  | Sample size                                                                                                            | Result/conclusion as reported in the article                                                                                                                                                                     |
|------------------------|-------------------------------------------------------------------------------------|---------------------------------------------------------------------------------------------------------------------------------------------------------------------------------------|----------------------------------------------------------------------------------------------------------------------------------------|--------------------------------------------------------------------------------------------------------------------------------------------------------------------------------------------------------------------------------------------------------------------------------------|-----------------------------------------------------------------------------------------------|------------------------------------------------------------------------------------------------------------------------|------------------------------------------------------------------------------------------------------------------------------------------------------------------------------------------------------------------|
| Adeboyeje, 2017<br>USA | HealthCore integrated research environment<br>Nov 1, 2009 - Jan 31, 2016            | NVAF patients newly prescribed OAC (no prescriptions for any anticoagulant in the 6-month period preceding their index dates).                                                        | Age (mean): 66-69<br>Male: 59.1-65.5%<br>CHA2DS2-VASc: 2.7-3.2<br>Comorbidity index: NR                                                | Hospitalization for major bleeding (ICD 9-CM codes; whether primary and secondary codes were used is not described)                                                                                                                                                                  | Extreme weights: not reported.<br>Balanced if the absolute value of the STD was $\leq 10\%$ . | dabigatran: n=8,539<br>rivaroxaban: n=8,398<br>apixaban: n=3,689                                                       | Apixaban and dabigatran were associated with lower major bleeding risk compared with rivaroxaban; however, apixaban had a lower risk of major gastrointestinal bleeding than dabigatran.                         |
| Chan, 2018<br>Taiwan   | Taiwan National Health Insurance Research<br>June 1, 2012 - Dec 31, 2016            | NVAF patients with their first prescription of OAC                                                                                                                                    | Age: 75 $\pm$ 10- 76 $\pm$ 10<br>Male: 55-60%<br>CHA2DS2-VASc: 3.7-3.9<br>Comorbidity index: NR                                        | Hospitalization for ischemic stroke/systemic embolism, intracranial hemorrhage, major gastrointestinal bleeding, acute myocardial infarction, all major bleeding events, and all-cause mortality. ICD 9 and 10 codes, whether primary and secondary codes were used is not described | Extreme weights: not reported.<br>Balanced if the absolute value of the STD was $\leq 10\%$ . | rivaroxaban: n=27,777<br>dabigatran: n=20,079<br>apixaban: n=5,843                                                     | Three low-dose NOACs showed similar performance as without subgrouping                                                                                                                                           |
| Charlton, 2018<br>USA  | HealthCore Integrated Research Environment database<br>Nov 1, 2010 - March 31, 2014 | NVAF patients hospitalized for bleeding after starting OAC (AF diagnosis 6 months before starting one of the index drugs).                                                            | Age: 68.0 $\pm$ 12.5- 69.6 $\pm$ 12.6<br>Male: 61.8-62.9<br>CHA2DS2-VASc: 3.8 -3.8<br>CDI: 2.0-2.3                                     | Total length of hospital stay, proportion of patients admitted to the ICU, mean length of ICU stay, and all-cause 30- and 90-day mortality, ICD 9 codes, whether primary and secondary codes were used is not described.                                                             | Extreme weights: not reported.<br>Balance was tested using ANOVAs for significant differences | dabigatran: n=442<br>rivaroxaban n=256                                                                                 | There were no significant differences in relative risk of all-cause 30- or 90-day                                                                                                                                |
| Graham, 2016<br>USA    | Medicare<br>Nov 4, 2011 - June 30, 2014                                             | NVAF patients, at least 65 years old, initiating OAC at standard doses (first treatment, received no NOAC treatment for other indications in the last 6 months before the index date) | Age: 65-74 y: 50-51%<br>Age: 75-84: 40-40%<br>Age $\geq$ 85: 9-10%<br>Male: 53-53%<br>CHADS2 $\geq$ 2: 66-67%<br>Comorbidity index: NR | Thromboembolic stroke, ICH, major extracranial bleeding events and mortality (as the first study outcome or within 30 days after hospitalization for another primary outcome event), ICD 9 codes, whether primary and secondary codes were used is not described.                    | Extreme weights: not reported<br>Balanced if the absolute value of the STD was $\leq 10\%$ .  | rivaroxaban: n=66,651<br>dabigatran: n=52,240<br><br>Weighted cohorts<br>rivaroxaban: n=66,630<br>dabigatran: n=52,264 | Treatment with rivaroxaban was associated with statistically significant increases in intracranial bleeding and major extracranial bleeding, including major gastrointestinal bleeding, compared with dabigatran |



| Author and country      | Setting and study period                                                                                                                             | Study population                                                                                             | Patient characteristics (range between NOACs)                                                                                                      | Primary outcome definition                                                                                                                                                                                                                                                                                                                                          | IPWT details                                                                                           | Sample size                                                                                                                                                         | Result/conclusion as reported in the article                                                                                                                                                                                 |
|-------------------------|------------------------------------------------------------------------------------------------------------------------------------------------------|--------------------------------------------------------------------------------------------------------------|----------------------------------------------------------------------------------------------------------------------------------------------------|---------------------------------------------------------------------------------------------------------------------------------------------------------------------------------------------------------------------------------------------------------------------------------------------------------------------------------------------------------------------|--------------------------------------------------------------------------------------------------------|---------------------------------------------------------------------------------------------------------------------------------------------------------------------|------------------------------------------------------------------------------------------------------------------------------------------------------------------------------------------------------------------------------|
| Graham, 2019<br>USA     | fee-for-service Medicare Part A (hospitalization), Part B (office-based care), and Part D (prescription drug coverage)<br><br>Oct, 2010 - Sept, 2015 | NVAF patients of ≥65 years old (first initiation of treatment)                                               | Age (mean): 74.9-75.5<br>Male: 52.2-59.3%<br>CHA2DS2-VASc ≥2: 96.6-97.4%<br>Comorbidity index: NR                                                  | Hospitalized due to thromboembolic stroke, intracranial haemorrhage, major extracranial bleeding, and all-cause mortality. ICD codes from the first hospital discharge diagnosis position                                                                                                                                                                           | Not described how weighted cohort was composed.<br>Balanced if the absolute value of the STD was ≤10%. | rivaroxaban: n=106,389<br>dabigatran: n=86,198<br>apixaban: n=73,039<br><br>Weighted cohort<br>rivaroxaban: n=106,369<br>dabigatran: n=86,293<br>apixaban: n=72,921 | Dabigatran and apixaban were associated with a more favourable benefit-harm profile than rivaroxaban.                                                                                                                        |
| Hernandez, 2017<br>USA  | Medicare<br><br>Nov 4, 2011 -Dec 31, 2013                                                                                                            | NVAF patients (at any time before the index date; no NOAC treatment at least 3 months before the index date) | High dose:<br>Age: <65: 5.0-6.3%<br>Age: 65-74: 38.4-39.3%<br>Age: ≥75: 55.3-55.7%<br>Male: 45.9-49.5%<br>CHADS2: 3.3-3.3<br>Comorbidity index: NR | ischemic stroke (inpatient, emergency room, or outpatient claim with primary or secondary, ICD-9 codes), other thromboembolic events, and all-cause mortality; ICD 9 codes, whether primary and secondary codes were used is not described.<br>Any bleeding event and major bleeding; intracranial hemorrhage and gastrointestinal bleeding, not further described. | Extreme weights: not reported<br>Balanced if the absolute value of the STD was ≤10%.                   | dabigatran n=9,138<br>rivaroxaban n=8,367                                                                                                                           | There was no difference in stroke prevention between rivaroxaban and dabigatran; however, rivaroxaban was associated with a higher risk of thromboembolic events other than stroke, death, and bleeding.                     |
| Larsen, 2016<br>Denmark | Danish national prescription registry, Danish national patient register, Danish civil registration system<br><br>August, 2011 -Oct, 2015             | NVAF patients who were naïve to oral anticoagulants (no use of oral anticoagulant within one year)           | Age (median, IQR): 67.6 (62.0-72.4)-71.8 (65.7-78.9)<br>Male: 56.9-66.1%<br>CHA2DS2VASc: 2.2-2.8<br>Comorbidity index: NR                          | Ischaemic stroke or systemic embolism, ICD-10 codes whether primary and secondary codes were used is not described.                                                                                                                                                                                                                                                 | Extreme weights: not reported<br>Balanced if the absolute value of the STD was ≤10%.                   | dabigatran: n=12,701<br>rivaroxaban: n=7,192<br>apixaban: n=6,349                                                                                                   | Apixaban and dabigatran were associated with a significantly lower risk of death compared with rivaroxaban. Risk of any bleeding or major bleeding were significantly lower for apixaban and dabigatran than for rivaroxaban |
| Meng, 2019<br>Taiwan    | National Health Insurance claims database<br><br>June 1, 2012 - May 31, 2015                                                                         | All NVAF patients aged ≥20 years who initiated NOACs during study period                                     | Age <65: 11.8-13.5%<br>Age 65-74: 29.7-32.7%<br>Age ≥75: 53.8-58.4%<br>Male: 54.6-56.2%<br>CHA2DS2-VASc: 3.2-3.3<br>Comorbidity index: NR          | all-cause death, ischemic stroke, intracranial hemorrhage, gastrointestinal hemorrhage needing transfusion, ICD-10 codes, whether primary and                                                                                                                                                                                                                       | Extreme weights: not reported<br>Balanced if the absolute value of the STD was ≤10%.                   | dabigatran: n=13,505<br>rivaroxaban: n=6,551<br><br>Weighted pseudo-cohort                                                                                          | Rivaroxaban seemed to be associated with an increased risk of all-cause death compared with dabigatran                                                                                                                       |

1  
2  
3  
4  
5  
6  
7  
8  
9  
10  
11  
12  
13  
14  
15  
16  
17  
18  
19  
20  
21  
22  
23  
24  
25  
26  
27  
28  
29  
30  
31  
32  
33  
34  
35  
36  
37  
38  
39  
40  
41  
42  
43  
44  
45  
46

| Author and country | Setting and study period | Study population | Patient characteristics (range between NOACs) | Primary outcome definition                 | IPWT details | Sample size                                | Result/conclusion as reported in the article |
|--------------------|--------------------------|------------------|-----------------------------------------------|--------------------------------------------|--------------|--------------------------------------------|----------------------------------------------|
|                    |                          |                  |                                               | secondary codes were used is not described |              | dabigatran: n=13,508; rivaroxaban: n=6,547 |                                              |

For peer review only



1  
2  
3  
4  
5  
6  
7  
8  
9  
10  
11  
12  
13  
14  
15  
16  
17  
18  
19  
20  
21  
22  
23  
24  
25  
26  
27  
28  
29  
30  
31  
32  
33  
34  
35  
36  
37  
38  
39  
40  
41  
42  
43  
44  
45  
46

**Table 3. Characteristics of the included articles that used adjusted Cox-proportional hazard models as primary analyses (n=10)**

| Author and country         | Setting and study period                                                                                                                                                 | Study population                                                                                             | Patient characteristics (range between NOACs)                                                   | Primary outcome definition                                                                                                                                                                                                                                                              | Sample size                                                          | Results/conclusion as reported in the article                                                                                                                                                                                                                                                          |
|----------------------------|--------------------------------------------------------------------------------------------------------------------------------------------------------------------------|--------------------------------------------------------------------------------------------------------------|-------------------------------------------------------------------------------------------------|-----------------------------------------------------------------------------------------------------------------------------------------------------------------------------------------------------------------------------------------------------------------------------------------|----------------------------------------------------------------------|--------------------------------------------------------------------------------------------------------------------------------------------------------------------------------------------------------------------------------------------------------------------------------------------------------|
| Al-Khahili, 2016<br>Sweden | tertiary referral cardiology outpatient clinic (the Stockholm Heart Center)<br><br>Dec, 2011 - May, 2014                                                                 | NVAF patients from a single cardiology outpatient clinic incorporating the AF unit (initiate NOAC treatment) | Age: 72±8-73±8<br>Male: 50-51%<br>CHA2DS2-VASc: 3-3<br>Comorbidity index: NR                    | Major bleeding was defined according to the criteria of the International Society of Thrombosis and Hemostasis                                                                                                                                                                          | rivaroxaban: n=282;<br>apixaban: n=251<br>dabigatran: n=233;         | Rivaroxaban was associated with the highest bleeding rates owing mainly to the highest number of minor bleedings, and apixaban had the lowest bleeding rates and side effects                                                                                                                          |
| Alonso, 2017<br>USA        | Truven Health MarketScan® Commercial Claims and Encounter Database and the Medicare Supplemental and Coordination of Benefits Database<br><br>Jan 1, 2007 - Dec 31, 2014 | NVAF patients with a first prescription of OAC after Nov 2, 2011.                                            | Age: 67.2±12.4- 69.3±12.5<br>Male: 60.1-65.1%<br>CHA2DS2-VASc: 2.9-3.6<br>Comorbidity index: NR | Hospitalization for liver injury potentially related to drug hepatotoxicity, ICD-9-CM codes in any position                                                                                                                                                                             | rivaroxaban: n=30,347;<br>dabigatran: n=17,286;<br>apixaban: n=9,205 | Risk of liver disease hospitalization was higher in rivaroxaban users compared to dabigatran and apixaban users                                                                                                                                                                                        |
| Chan, 2016<br>Taiwan       | Taiwan National Health Insurance Research Database.<br><br>Jan 1, 1996 - Dec 31, 2013                                                                                    | NVAF patients newly diagnosed                                                                                | Age: 75±9- 76 ±9<br>Male: 54-58<br>CHA2DS2-VASc: 4.1-4.1<br>Comorbidity index: NR               | Ischemic stroke or systemic embolism, ICH, hospitalization for GI bleeding, acute myocardial infarction (AMI), all hospitalizations for bleeding, and all-cause mortality. All discharge diagnosis according to the ICD, whether primary and secondary codes were used is not described | dabigatran 110 mg: n= 5,921<br>rivaroxaban 10 mg: n=3,916            | No differences were found between rivaroxaban and dabigatran in risk for thromboembolic events, intracranial haemorrhage, critical gastrointestinal bleeding, or all-cause mortality. However, rivaroxaban was associated with a higher risk for noncritical gastrointestinal bleeding than dabigatran |

| Author and country                  | Setting and study period                                                                                                                                                                | Study population                                                                                                           | Patient characteristics (range between NOACs)                                                                | Primary outcome definition                                                                                                                                                                                 | Sample size                                                          | Results/conclusion as reported in the article                                                                                                                                                                                                                               |
|-------------------------------------|-----------------------------------------------------------------------------------------------------------------------------------------------------------------------------------------|----------------------------------------------------------------------------------------------------------------------------|--------------------------------------------------------------------------------------------------------------|------------------------------------------------------------------------------------------------------------------------------------------------------------------------------------------------------------|----------------------------------------------------------------------|-----------------------------------------------------------------------------------------------------------------------------------------------------------------------------------------------------------------------------------------------------------------------------|
| Hernandez, 2017<br>USA              | Medicare database<br>Jan 1, 2013 - Dec 31, 2014                                                                                                                                         | NVAF patients newly diagnosed                                                                                              | Age: 74.9±8.7-77.4±8.6<br>Male: 42.5-47.0%<br>CHA2DS2-VASc: 4.3-4.7<br>Comorbidity index: NR                 | Ischemic stroke, death, bleeding events, gastrointestinal bleeding, treatment persistence. ICD-9 codes, whether primary and secondary codes were used is not described                                     | rivaroxaban: n=5,139;<br>apixaban: n=2,358;<br>dabigatran: 1,415;    | Apixaban had the most favourable effectiveness and safety profile                                                                                                                                                                                                           |
| Lamberts, 2017<br>Denmark           | Danish national patient registry, Danish national prescription registry, Danish civil personal registry<br>up to December 31, 2015                                                      | NVAF patients ≥18 years, with newly prescribed OAC (no prescription at least 6 months before inclusion)                    | Age: 71.5±11.0-75.4±11.10<br>Male: 50.8-56.7%<br>CHA2DS2-VASc: 2.7-3.2<br>Comorbidity index: NR              | major bleeding events requiring hospitalisation, ICD-10 codes, whether primary and secondary codes were used is not described                                                                              | dabigatran: n=15,413;<br>apixaban: n=7,963;<br>rivaroxaban: n=6,715; | Apixaban had a lower adjusted major bleeding risk compared with rivaroxaban and dabigatran                                                                                                                                                                                  |
| Lip, 2016 (Int J Clin Pract)<br>USA | Truven MarketScan® Commercial & Medicare supplemental US database<br>Jan 1, 2013 - Dec 31, 2013                                                                                         | NVAF patients ≥18 years with newly prescribed OAC (no OACs received at least 1 year before the start of the OAC treatment) | Age: 66.8±12.2-69.3±12.3<br>Male: 63.1-65.8%<br>CHA2DS2-VASc: 2.6-2.8<br>CCI: 1.7-1.9                        | Major bleeding was identified using hospital claims, which had a bleeding diagnosis code as the first listed primary ICD-9 diagnosis code                                                                  | rivaroxaban: n=10,050<br>dabigatran: n=4,173<br>apixaban: n=2,402    | Initiation with rivaroxaban was associated with a significantly greater risk of major bleeding compared with initiation on apixaban. There was no significant difference in the risk of major bleeding among patients newly initiated on dabigatran compared with apixaban. |
| Mueller, 2019<br>Scotland           | Prescribing Information System, the Scottish Morbidity Records/ Hospital Inpatients and Outpatient attendance datasets; National Records of Scotland<br>Drug's approval date – Dec 2015 | NVAF patients who initiated NOAC treatment                                                                                 | Age: 71.1±12.0-74.8±11.0<br>Male: 53.5-73.1%<br>CHA2DS2-VASc: 2.5-3.0<br>CCI: 1.1-1.4                        | strokes, systemic embolism, death due to cardiovascular, pulmonary embolism, bleeding events, clinical endpoints, according to ICD-10 codes whether primary and secondary codes were used is not described | rivaroxaban: n=7,265<br>apixaban: n=6,200;<br>dabigatran: n=1,112;   | All NOACs were similarly effective in preventing strokes and systemic embolisms, while patients being treated with rivaroxaban exhibited the highest bleeding risks.                                                                                                        |
| Staerk, 2018<br>Denmark             | Danish national patient registry, Danish national prescription registry,                                                                                                                | NVAF patients, first-time OAC users (no previous OAC use), between 30 and 100 years old                                    | Standard dose:<br>Age (median, IQR): 67(61, 71)-71(65, 78)<br>Male: 55.4-63.7%<br>CHA2DS2-VASc (median); 2-3 | stroke/thromboembolism (TE), ischaemic stroke, major bleeding, intracranial bleeding and gastrointestinal bleeding, ICD-10 codes whether primary and                                                       | dabigatran: n=11,492<br>apixaban: n=11,064<br>rivaroxaban: n=8966    | Rivaroxaban was associated with higher bleeding risk                                                                                                                                                                                                                        |

| Author and country     | Setting and study period                                                                                                                                     | Study population                                                                              | Patient characteristics (range between NOACs)                                                            | Primary outcome definition                                                                                                         | Sample size                                                          | Results/conclusion as reported in the article                                                                                                                                                                                                                                                                                                              |
|------------------------|--------------------------------------------------------------------------------------------------------------------------------------------------------------|-----------------------------------------------------------------------------------------------|----------------------------------------------------------------------------------------------------------|------------------------------------------------------------------------------------------------------------------------------------|----------------------------------------------------------------------|------------------------------------------------------------------------------------------------------------------------------------------------------------------------------------------------------------------------------------------------------------------------------------------------------------------------------------------------------------|
|                        | Danish civil registration system<br><br>March 1, 2012 - Dec 31, 2016                                                                                         |                                                                                               | Comorbidity index: NR                                                                                    | secondary codes were used is not described                                                                                         |                                                                      | compared with dabigatran and apixaban and dabigatran was associated with lower intracranial bleeding risk compared with rivaroxaban and apixaban.                                                                                                                                                                                                          |
| Tepper, 2018<br>USA    | Truven MarketScan Commercial Claims and Encounter and Medicare Supplemental & Coordination of Benefits Early View Database<br><br>Jan 1, 2013 - Oct 31, 2014 | NVAF patients aged ≥18 years with new initiators of NOACs or switched from warfarin to a NOAC | Age: 68±12- 70±12<br>Male: 65.3-62.7<br>CHA2DS2-VASc: 2.4-2.5<br>CCI: 1.6-1.8                            | Bleeding, ICD-9-CM codes, whether primary and secondary codes were used is not described                                           | rivaroxaban: n=30,529<br>dabigatran: n=20,963<br>apixaban: n=8,785;; | Rivaroxaban appeared to have an increased risk of any bleeding, clinically relevant non-major bleeding, and major inpatient bleeding, compared to apixaban patients. There was no significant difference in any bleeding, clinically relevant non-major bleeding, or inpatient major bleeding risks between patients treated with dabigatran and apixaban. |
| Vinogradova 2018<br>UK | UK general practices contributing to QResearch or Clinical Practice Research Datalink<br><br>2011 - 2016                                                     | NVAF patients, new NOAC (received no OAC treatment in at least the last 12 months)            | QResearch:<br>Age: 74.7±10.7- 76.5±10.9<br>Male: 51.8-58.0%<br>CHA2DS2-VASc: NR<br>Comorbidity index: NR | Major bleeding after entry to the study which led to a hospital admission or death, based on linked hospital or mortality records. | rivaroxaban: n= 16,547<br>apixaban: n= 10,601<br>dabigatran: n=5,537 | Apixaban was associated with a lower risk of major bleed than rivaroxaban. Rivaroxaban was associated with a higher risk of intracranial bleed compared to apixaban. rivaroxaban was associated with higher risks compared with apixaban for haematuria, all gastrointestinal bleed and upper gastrointestinal bleed.                                      |

1  
2  
3  
4  
5  
6  
7  
8  
9  
10  
11  
12  
13  
14  
15  
16  
17  
18  
19  
20  
21  
22  
23  
24  
25  
26  
27  
28  
29  
30  
31  
32  
33  
34  
35  
36  
37  
38  
39  
40  
41  
42  
43  
44  
45  
46

| Author and country | Setting and study period | Study population | Patient characteristics (range between NOACs) | Primary outcome definition | Sample size | Results/conclusion as reported in the article                                         |
|--------------------|--------------------------|------------------|-----------------------------------------------|----------------------------|-------------|---------------------------------------------------------------------------------------|
|                    |                          |                  |                                               |                            |             | The risk of primary ischaemic stroke did not differ between any of the anticoagulants |

For peer review only

1  
2  
3  
4  
5  
6  
7  
8  
9  
10  
11  
12  
13  
14  
15  
16  
17  
18  
19  
20  
21  
22  
23  
24  
25  
26  
27  
28  
29  
30  
31  
32  
33  
34  
35  
36  
37  
38  
39  
40  
41  
42  
43  
44  
45  
46

**Table 4. Characteristics of the included articles that used unadjusted primary analysis (n=2)**

| Author and country   | Setting and study period                                                                                                                                                    | Study population                                                                                                                       | Patient characteristics (range between NOACs)                                                   | Primary outcome definition                                                                                                                                                                                                                            | Primary analysis                                                                                    | Sample size                                                                    | Results/conclusion as reported in the article                                                                                                                                               |
|----------------------|-----------------------------------------------------------------------------------------------------------------------------------------------------------------------------|----------------------------------------------------------------------------------------------------------------------------------------|-------------------------------------------------------------------------------------------------|-------------------------------------------------------------------------------------------------------------------------------------------------------------------------------------------------------------------------------------------------------|-----------------------------------------------------------------------------------------------------|--------------------------------------------------------------------------------|---------------------------------------------------------------------------------------------------------------------------------------------------------------------------------------------|
| Cerda, 2019<br>Spain | Oral Anticoagulant Treatment Unit of the Hemostasis and Thrombosis Department of the University Hospital Vall d'Hebron from Barcelona (Spain)<br><br>Jan, 2015 - Sept, 2017 | NVAF patients with nonvalvular AF, with or without prior stroke, that had started treatment with any NOAC for the prevention of stroke | Age: 73.1±15.2- 78.9±8.7<br>Male: 45.1-63.4%<br>CHA2DS2-VASc: 3.9-4.4<br>Comorbidity index: NR  | Major bleeding according to ISTH 2005                                                                                                                                                                                                                 | log-rank test                                                                                       | rivaroxaban: n=663;<br>dabigatran: n=352<br>apixaban: n=325<br>edoxaban: n=103 | Rates of ischemic stroke and intracranial hemorrhage were similar among different NOACs, but rates of major bleeding were higher with dabigatran and apixaban and lower with rivaroxaban.   |
| Li, 2017<br>China    | Queen Mary Hospital, Hong Kong<br><br>Jan, 2008 - Dec, 2014                                                                                                                 | NVAF patients diagnosed during study period.                                                                                           | Age: 71.9±11.1- 73.3±12.1<br>Male: 53.1-59.8%<br>CHA2DS2-VASc: 3.6-3.7<br>Comorbidity index: NR | The primary outcome was a composite of hospital admission with ischemic stroke or ICH, or death during the follow-up period. ICD-10 codes in medical records, and discharge summaries, whether primary and secondary codes were used is not described | Cox proportional hazard model (likely unadjusted, but this is not clearly described in the article) | rivaroxaban: n=669;<br>dabigatran: n=467                                       | Dabigatran had a lower ischemic stroke risk compared with patients on rivaroxaban. There was no significant difference in ischemic stroke risk between those on rivaroxaban and dabigatran. |

**Table 5. Characteristics of the included articles that used propensity score stratification as primary analyses (n=1)**

| Author and country               | Setting and study period                                                                                                                      | Study population                                                                          | Patient characteristics (range between NOACs)                                                                  | Primary outcome definition                                                                                                                                                  | PS details                                                                                                                                                    | Sample size                                  | Results/conclusion as reported in the article                                                                                   |
|----------------------------------|-----------------------------------------------------------------------------------------------------------------------------------------------|-------------------------------------------------------------------------------------------|----------------------------------------------------------------------------------------------------------------|-----------------------------------------------------------------------------------------------------------------------------------------------------------------------------|---------------------------------------------------------------------------------------------------------------------------------------------------------------|----------------------------------------------|---------------------------------------------------------------------------------------------------------------------------------|
| Gorst-Rasmussen, 2016<br>Denmark | Danish national prescription registry, Danish national patient register, Danish civil registration system<br><br>Feb. 1, 2012 - July 31, 2014 | NVAF patients who were new-users of OAC (no OAC treatment in at least the last two years) | Standard dose:<br>Age: 66.0±8.5-72.8±9.9<br>Male: 51.1-63.5%<br>CHA2DS2-Vasc: 2.1-3.0<br>Comorbidity index: NR | ischemic stroke/systemic embolism/transient ischemic attack, any bleeding and all-cause death. ICD-10 codes, whether primary and secondary codes were used is not described | Asymmetric trimming of the propensity score. Trimmed propensity score was used in 10 deciles as strata<br>Balanced if the absolute value of the STD was ≤10%. | dabigatran: n=8,908<br>rivaroxaban: n=1,405; | Rivaroxaban and dabigatran had similar stroke rates. Bleeding and mortality rates were higher in rivaroxaban versus dabigatran. |

Peer review only

**Table 6. Main differences between the included studies (n=39)**

| Study item                                           | Range, total number of studies, or description                                                                                                                                                                                                                                                                                                    |
|------------------------------------------------------|---------------------------------------------------------------------------------------------------------------------------------------------------------------------------------------------------------------------------------------------------------------------------------------------------------------------------------------------------|
| Country                                              | USA: n=24<br>Denmark: n=5<br>Taiwan: n=4<br>China: n=1<br>France: n=1<br>Scotland: n=1<br>Sweden: n=1<br>Spain: n=1<br>UK: n=1                                                                                                                                                                                                                    |
| NOAC included in included studies                    | Dabigatran: n=39<br>Rivaroxaban: n=39<br>Apixaban: n=26<br>Edoxaban: n=1                                                                                                                                                                                                                                                                          |
| Most prescribed NOAC in included studies per country | Dabigatran: Denmark<br>Rivaroxaban: USA, UK, China, Scotland, and Taiwan<br>Apixaban: In none of the included studies<br>Edoxaban: In none of the included studies<br>About equal*: France, Spain, Sweden                                                                                                                                         |
| Baseline characteristics                             | Mean age, years: 65-84<br>% males: 39-73<br>Mean CHA2DS2-Vasc: 2.1-4.9                                                                                                                                                                                                                                                                            |
| Primary study outcomes                               | Effectiveness outcomes:<br>- stroke,<br>- systemic embolism or composite of stroke/systemic embolism,<br>- all-cause death,<br>- myocardial infarction,<br>- venous thromboembolism.<br>Safety outcomes:<br>- major bleeding,<br>- a specific type of bleeding (e.g. intracranial haemorrhage, gastrointestinal bleeding etc.,<br>- liver injury. |
| Statistical approaches                               | PS matching: n=18<br>IPTW: n=8<br>PS stratification: n=1<br>Cox PH regression model: n=10<br>Unadjusted analyses: n=2                                                                                                                                                                                                                             |
| Sample size                                          | N=698 - N=265,583                                                                                                                                                                                                                                                                                                                                 |
| Study results                                        | Of the 26 studies in which apixaban, rivaroxaban and dabigatran were included:<br>- apixaban was favourable compared to dabigatran and rivaroxaban: n=13<br>- no single favourable NOAC: n=13                                                                                                                                                     |

\* about equal distribution between dabigatran, rivaroxaban and apixaban. Edoxaban is not included in these studies.

1  
2  
3 More than 50% of the studies were conducted in the USA (n=24),[16-39] five were conducted in Denmark,[40-44]  
4 four in Taiwan,[45-48] and one in France,[49] Sweden,[50] Scotland,[51] the UK,[52] Spain,[53] and China.[54]  
5  
6 Dabigatran and rivaroxaban were included in all 39 studies, apixaban was included in 26 studies and edoxaban  
7  
8 was included in 1 study. Next to these NOACs, VKA was included in 25 of these studies as one of the  
9  
10 comparators. The results below focus on the NOAC to NOAC comparisons only.

11  
12 In the studies that included apixaban, dabigatran and rivaroxaban, rivaroxaban was most dominantly used in the  
13  
14 USA, UK, Scotland, and Taiwan, while dabigatran was the most prescribed NOAC in Denmark. In three other  
15  
16 European studies the distribution was about equal between the three NOACs. In none of the included studies,  
17  
18 apixaban was the most dominantly prescribed NOAC.

### 21 **Setting**

22 Most studies concerned patient registries, pharmacy or prescription databases and/or health insurance databases  
23  
24 (n=39), while there were three clinical practice based studies.[50, 53, 54]

### 27 **Study population**

28  
29 All studies included only NVAF patients. In seven studies, it was specifically described that patients were newly  
30  
31 diagnosed with NVAF and initiated NOAC treatment during study period.[21, 27, 34, 37, 40, 45, 54] None of the  
32  
33 other studies included prevalent users of (N)OAC, but included e.g. 'newly treated', 'initiating treatment', 'new  
34  
35 users', 'first-time prescription' of NVAF patients who were prescribed (N)OAC. In some studies (N)OAC use in the  
36  
37 past (between 3 months and 2 years before index date) was allowed, while this seemed not be allowed in some  
38  
39 other studies, or it was not described.

### 41 *Inclusion criteria*

42  
43 Five studies concerned elderly patients specifically (i.e.  $\geq 65$  years old),[19, 21, 23-25] two included adults  $\geq 45$   
44  
45 years old,[33, 40] and one study included patients between 30 and 100 years of age.[44] The other studies  
46  
47 included all adults with atrial fibrillation (it was assumed that if no further age specification was provided, 'adults'  
48  
49 meant that all  $>18$  years old were included). In one study only patients who were hospitalised for bleeding after  
50  
51 start with OAC treatment were included.[22] No other focus on a specific group of AF patients was found.

### 54 *Exclusion criteria*

55  
56 NOAC use that could be related to other disorders, such as transient AF, major knee or hip surgery, venous  
57  
58 thromboembolism or pulmonary embolism, were specifically described as exclusion criteria in most studies,  
59  
60



1  
2  
3 except in ten studies.[16, 27, 28, 33-35, 50, 52-54] In one study patients with liver injury before their first oral  
4 anticoagulant (OAC) prescription were specifically excluded.[18]  
5  
6  
7

### 8 *Baseline characteristics*

9  
10 Baseline characteristics of the NVAf patients differed between studies. Mean age ranged from 65-84 years  
11 between the studies. The percentage of males ranged from 39-73%, and the mean CHA2DS2-Vasc Score ranged  
12 from 2.1-4.9. Excluding the five studies that specifically focussed on an elderly population of  $\geq 65$  years old and  
13 the two additional studies that used the Medicare database (only patients of 65 years or older are in Medicare),  
14 the mean age ranged from 65-78 years old. Different measures were used to assess the comorbidity index:  
15 Charlson comorbidity index, Charlson-Deyo index and Gagne comorbidity score, while in 30 of the 43 studies no  
16 comorbidity index was presented.  
17  
18  
19  
20  
21  
22

### 23 **Selection of covariates**

24  
25 Most studies (n=34) did not provide a rationale for the selection of covariates that were included in the PS model  
26 or in adjusted analysis. However, in one of the articles an extensive rationale and selection procedure of co-  
27 variates that were included in the analysis was provided.[33] In three other studies, the authors selected  
28 covariates based on medical knowledge on risk factors with reference to earlier published studies.[31, 39, 52] In  
29 one other study it was reported that sociodemographic and clinical characteristics that were associated with  
30 treatment initiation and the risk of major bleeding were included in the model to adjust for differences across  
31 cohorts, without further explanation or reference.[30]  
32  
33  
34  
35  
36  
37  
38

### 39 **Definition primary study outcomes**

40  
41 Primary outcomes differed between the studies. Effectiveness outcomes included in the studies included stroke,  
42 systemic embolism, (or composite of stroke/systemic embolism), all-cause death, myocardial infarction, venous  
43 thromboembolism and safety outcomes included major bleeding, or a specific type of bleeding (e.g. intracranial  
44 haemorrhage, gastrointestinal bleeding etc.) and liver injury. In most studies, ICD-9 or ICD-10 codes were used,  
45 but whether this concerned a primary diagnosis only or whether it could be either a primary or a second diagnosis  
46 differed between the studies. In some studies it was not described whether the ICD codes referred to primary  
47 diagnosis only or to a primary or secondary diagnosis.  
48  
49  
50  
51  
52  
53

### 54 **Statistical approaches to adjust for confounding (primary analysis)**

55  
56 In 18 studies, PS matching was done.[16, 19-21, 23, 26, 29, 30, 32-37, 39, 40, 47, 49] IPTW was used in eight  
57 studies.[17, 22, 24, 25, 28, 43, 46, 48] PS stratified analyses was done in one study.[41] In twelve studies, the  
58 primary analyses utilised a Cox PH regression model in which adjustment for confounding was done.[18, 27, 31,  
59  
60

1  
2  
3 38, 42, 44, 45, 50-52] Finally, in two studies no adjustment for differences in baseline characteristics was  
4 performed.[53, 54]  
5  
6  
7

### 8 *PS matching*

#### 9 Co-variables

10 Creatinine clearance was not included as a covariate in any of the 18 studies. All 18 studies took the following  
11 covariates into account: age, sex, CHA2DS2-VASc score and/or the individual comorbidities included in this  
12 score, HAS-BLED score and/or the individual conditions included in this score (except alcohol use in Lai et al.  
13 [47]), renal disease, and co-medication use such as antiplatelets. Some included other comorbidities, such as  
14 cancer, rheumatic disease, specific heart diseases, COPD, HIV, dementia, depression, neurological disorders,  
15 and/or a various list of co-medications as well.  
16  
17  
18  
19  
20  
21  
22

#### 23 Matching method

24 In one study the matching method was not described.[49] In two studies, the calliper used was not described.[23,  
25 29] In seven studies 1:1 PS matching without replacement was used and a calliper of 0.01 was applied.[16, 19,  
26 20, 26, 30, 32, 36] Five other studies also matched 1:1 without replacement but used another calliper: in three  
27 studies a calliper of 0.2 was used,[39, 40, 47] while two others used a calliper of <0.25.[33, 35] In three studies,  
28 three-way matching was used.[21, 34, 37]  
29  
30  
31  
32  
33  
34

#### 35 Balance co-variables

36 In two studies it was not described how the balance between covariates was evaluated.[33, 35] In two studies the  
37 balance was evaluated using  $p < 0.05$  (of which one also used standardized difference of <10%),[23, 47] and in  
38 another study it was stated that the groups were comparable even though a  $p$  value of  $> 0.05$  was found.[29]  
39 Balance was checked with an absolute standardized difference of <10% in 13 studies.[16, 19-21, 26, 30, 32, 34,  
40 36, 37, 39, 40, 47, 49] Balance was reached in all studies after matching.  
41  
42  
43  
44  
45  
46  
47

#### 48 Sample size

49 In four studies the sample size before matching was not reported[29, 35, 36, 39] and in one study the sample size  
50 after matching was not reported.[34] At study start (before PSM), sample size between the NOACs differed  
51 greatly, except in three studies.[21, 37, 40]  
52  
53  
54  
55  
56  
57  
58  
59  
60

### *IPTW*

In one study, balance was tested using ANOVAs for significant differences.[22] Balance was checked with an absolute standardized difference of <10% in the other nine studies.[17, 24, 25, 28, 43, 46, 48] Balance was reached in all studies after IPTW.

There was no reporting on extreme weights in the eight included studies.[17, 22, 24, 25, 28, 43, 46, 48]

### *PS stratification*

In one study, asymmetric trimming of the PS was done, which resulted in a small part of both treatment groups being removed in order to gain in comparability. Balance in co-variables was reached with standardized difference of <10%. In a Cox model this trimmed PS was used in 10 deciles as strata.[41]

### Cox HP regression models

In ten studies, Cox HP regression models were applied with adjustment for a number of confounders.[18, 27, 31, 38, 42, 44, 45, 50-52] In one of these studies, the number of events per variable was not sufficient for such an analyses.[50] The ratio was acceptable in the other studies for at least some of the outcomes.[18, 28, 31, 38, 42, 44, 45, 51, 52]

### Unadjusted analysis

In two studies no adjustment for confounding factors seemed to have been done, even though significant differences between treatment groups existed at baseline. Cerda et al. presented events per 100 patient-years and used a log-rank test to determine whether outcomes differed between the NOACs.[53] Li et al. conducted a Cox proportional hazard model, likely unadjusted, but this was not clearly described in the article.[54]

### **Sensitivity analyses**

Although in some articles sensitivity analyses were done, none of the included studies further explored the magnitude of residual confounding in their sensitivity analyses using one of the approaches recommended by IPSOR (see methods section).

### **Study results**

Which NOAC performed best differed between the included studies. We found only one study that included all four NOACs, in which no preference for one specific NOAC was found, except that rates of major bleeding were lower with rivaroxaban.[53] Of the 26 studies in which apixaban, rivaroxaban and dabigatran were included, apixaban was favourable compared to dabigatran and rivaroxaban in 13 studies, of which 10 were from the USA, two from Europe and one from Asia,[16, 17, 19, 20, 23, 26, 28, 29, 32, 36, 42, 50, 52] while dabigatran and

rivaroxaban were not found to be the single most favourable NOAC in any of the remaining 13 studies. Results for these 13 studies were mixed, with either no favourable NOAC at all, or one NOAC was selected as the least favourable, while the other two NOACs did not differ.

### Naïve trial analysis

The primary efficacy endpoint (Strokes/SE) in the warfarin arms were estimated at 1.69% (RE-LY),<sup>[3]</sup> 2.2% (ROCKET),<sup>[6]</sup> 1.60% (ARISTOTLE),<sup>[5]</sup> and 1.50% (ENGAGE),<sup>[4]</sup> see table 7. From this range we chose a relatively arbitrary base rate of 1.6% and applied the observed risk reduction to estimate comparable base rates of 1.05% for dabigatran, 1.24% for rivaroxaban, 1.26% for edoxaban and 1.27% for apixaban. Using the sample size calculator<sup>[55]</sup> the biggest expected difference was between dabigatran and apixaban and it was estimated that a trial sample size with 51,847 patients would be needed to confirm this difference. The smallest difference was between edoxaban and apixaban and a trial of 7,994,340 patients required to confirm that difference.

**Table 7. Primary efficacy and safety endpoints of the four pivotal trials.**

|                         | RE-LY [3]                   |                             |                    | ROCKET-AF [6]         |                    | ARISTOTLE [5]      |                    | ENGAGE-AF [4]            |                          |                    |
|-------------------------|-----------------------------|-----------------------------|--------------------|-----------------------|--------------------|--------------------|--------------------|--------------------------|--------------------------|--------------------|
|                         | Dabigatran 150 mg<br>N=6076 | Dabigatran 110 mg<br>N=6015 | Warfarin<br>N=6022 | Rivaroxaban<br>N=7131 | Warfarin<br>N=7133 | Apixaban<br>N=9120 | Warfarin<br>N=9081 | Edoxaban 60 mg<br>N=7035 | Edoxaban 30 mg<br>N=7034 | Warfarin<br>N=7036 |
| Stroke/SE (%/year)      | 1.11                        | 1.53                        | 1.69               | 1.7                   | 2.2                | 1.27               | 1.60               | 1.18                     | 1.61                     | 1.50               |
| Major bleeding (%/year) | 3.11                        | 2.71                        | 3.36               | 3.6                   | 3.4                | 2.13               | 3.09               | 2.75                     | 1.61                     | 3.43               |

The primary safety endpoint was major bleeding for RE-LY, ARISTOTLE, and ENGAGE AF and major bleeding plus clinically relevant non-major bleeding for ROCKET AF, but data on major bleeds only for ROCKET-AF are available as well. Major bleeds in the warfarin arms were estimated at 3.36% (RE-LY),<sup>[3]</sup> 3.4% (ROCKET),<sup>[6]</sup> 3.09% (ARISTOTLE),<sup>[5]</sup> and 3.43% (ENGAGE).<sup>[4]</sup> From this range we choose a relatively arbitrary base rate of 3.2% and applied the observed risk reduction to estimate comparable base rates of 2.21% for apixaban 2.57% for edoxaban, 2.96% for dabigatran and 3.29% for rivaroxaban. Using the sample size calculator,<sup>[55]</sup> the biggest expected difference was between rivaroxaban and apixaban and it was estimated that a trial with 7,196 patients would be needed to confirm this difference. A much smaller difference is between edoxaban and apixaban which would require a trial of 56,512 patients to confirm that difference.

## DISCUSSION

In total, we found 39 studies directly comparing the effectiveness and/or safety of at least two NOACs in NVAF patients. Three studies can be considered to be of low quality due to insufficiently described methods and/or small sample size[50, 53, 54].

Even though the remaining studies could be considered of sufficiently quality based on the technical aspects of the studies, there are some issues that can hamper the generalisability of the results. These issues concern residual confounding, the use of a smaller or broader calliper, differences in baseline characteristics between studies, channelling bias and change in treatment paradigm, and the high number of patients needed.

Balance in baseline characteristics between NOACs was checked with p-values or a standardized difference of <10%. Balance was well at baseline in some studies, or was reached after PS matching or IWTP.[56] Even though some studies included over 40 covariates in their PS, in most studies it was not described how the covariates were selected. The ISPOR Good Research Practices for Retrospective Database Analysis recommends to include all factors that are theoretically related to outcome or treatment selection, even if the relation is weak or statistically non-significant. [14] Directed acyclic graphs might be helpful as well.[57] And even though balance was reached for all of these variables, one should keep in mind that balance between unmeasured or unmeasurable factors cannot be assumed.[14] Therefore, due to the lack of randomization, there is always a possibility of residual confounding. This possibility was acknowledged in all included studies, and all studies have largely the same missing covariates. Hardly any laboratory results and lifestyle information were included, such as body mass index, smoking status and alcohol consumption, which are also risk factors for ischaemic stroke and bleeding events respectively. Creatinine clearance for instance, seems to be an important covariate as subgroup analyses from the pivotal trials suggest that renal clearance might be an effect modifier.[5, 58] Only in one study however, the authors were able to take renal clearance into account in the adjusted analyses.[50] Especially when prescription of a certain NOAC in daily practice is driven by creatinine clearance, not adjusting for this variable may lead to biased results. However, it is unknown what the magnitude and direction (i.e. will the differences in effectiveness and safety between NOACs be smaller or larger) of this potential bias due to lack of randomization would be. The magnitude of residual confounding was not further explored in the sensitivity of the included studies..

In general, a calliper of <0.2 of the standard deviation of the logit of the PS is considered to be 'optimal'. [59] About half of the included PS matching studies used a smaller calliper, namely of <0.1. This means that the matching is more precise in these studies, but the disadvantage is that possibly more patients cannot be matched to another patient due to this smaller allowed maximum differences, and thus will be excluded from the analysis. Excluding

1  
2  
3 patients from the analysis will limit the generalisability of the results to the total patient population, especially when  
4 the excluded patients differ from the included patients, e.g. on the baseline risk for stroke.  
5  
6  
7

8 All included studies focused on NVAF patients only.. In eight studies, inclusion criteria regarding age were  
9 applied. Three of these will likely still cover the largest part of NOAC users as they set relatively broad age  
10 ranges. The other five focussed on an elderly population of NVAF patients of  $\geq 65$  years old. Besides applying  
11 specific inclusion criteria regarding age in some studies, these differences also depended on the specific registry  
12 or database that was used, e.g. Medicare is for people of 65 years old or older. Even though only five of the  
13 included studies focused on an elderly NVAF population, and the others applied broad age ranges, there were  
14 differences in mean age, proportion of males and mean CHA<sub>2</sub>DS<sub>2</sub>Vasc score between the studies, which can  
15 have an impact on the results and jeopardize the generalisability of the results.  
16  
17  
18  
19  
20  
21  
22

23 Rivaroxaban was the most prescribed NOAC in almost all included studies from the USA. However, in the first  
24 quarter of 2017, apixaban was the most prescribed NOAC in NVAF in the USA (i.e. in 50% of new OAC  
25 prescriptions). Especially older patients, women, increased stroke or bleeding risk and having comorbidities was  
26 associated with prescription of apixaban versus other NOACs.[60] Rivaroxaban was also the most prescribed  
27 NOAC in the included studies from the UK and Scotland. Based on the CPRD, 56.5% of the OAC prescriptions  
28 concerned a NOAC, of which rivaroxaban was still described most often in 2015.[61] Dabigatran was described  
29 most often in the studies from Denmark. Haastrup et al. described that most AF patients that initiated NOAC  
30 received dabigatran between 2008 and 2016, but a trend was observed that per 1000 person-years the number of  
31 patients described dabigatran decreased and the number of patients receiving rivaroxaban and apixaban  
32 increased.[62] This shows that the treatment paradigm changed over time, and might still be changing, and this  
33 pattern differs between the USA, Europe and Asia. Channelling bias therefore likely occurs and might shift  
34 between the NOACs. Although in a few studies it was mentioned that selective prescriptions were noticed and  
35 that these might have changed over time, none of the included studies dealt with temporal trends in prescription  
36 patterns.  
37  
38  
39  
40  
41  
42  
43  
44  
45  
46  
47  
48  
49

50 Our naïve analysis predicts that in terms of the primary efficacy outcome observational studies will need a  
51 relatively high number of patients to be able to demonstrate the differences between the NOACs and a small  
52 sample size will not allow robust comparison to be made.  
53  
54  
55  
56

57 The pattern of major bleeding events seen in the included observational studies, confirms the expectation from  
58 our naïve analysis of the pivotal clinical trials that rivaroxaban seems to have the least favourable safety profile  
59 among apixaban and dabigatran. The findings are not consistent to allow for a robust conclusion between  
60

1  
2  
3 apixaban and dabigatran which confirms the need for a high number of patients, although a trend for a slight  
4 better safety profile of apixaban can be observed.

5  
6 The requirement for a high number of patients to compare NOACs both in terms of efficacy and safety as  
7 predicted by the pivotal trial results is confirmed by the findings of the observational studies. This finding may  
8 support the claim that the differences between the NOACs are relatively small.  
9

10  
11  
12  
13 In the process of conducting systematic reviews it is inevitable that the review will never be completely up to date  
14 with the most recent published evidence. Even though our search ended in April 2019, recently published studies  
15 will have encountered the same issues as described above. Residual confounding and channelling bias cannot  
16 have been ruled out in newer publications. Ideally, head-to-head trials should be conducted to compare the  
17 efficacy/effectiveness and safety of the four NOACs to overcome the methodological issues in the comparative  
18 effectiveness studies. To our knowledge, one head to head trial including all four NOACs is currently running. This  
19 nationwide cluster randomized cross-over study aims to compare efficacy and safety of the four NOACs  
20 (clinicaltrials.gov; NCT03129490)  
21  
22  
23  
24  
25  
26  
27

28  
29 In conclusion, even though the larger part of these studies are conducted as well as possible considering what  
30 data are available, there are some important limitations regarding the generalisability of the study results  
31 especially given the relatively high patient number required for a meaningful comparison between NOACs. Most  
32 studies included all NVAf patients on NOAC available in the registry/database during the study period and did not  
33 apply further specific in- and exclusion criteria, but differences between studies regarding baseline characteristics  
34 existed. Mean age at study start and baseline risk for stroke (CHA<sub>2</sub>DS<sub>2</sub>-VASc score) differed between the  
35 studies. As channelling bias cannot be ruled out, the result of these studies might not be generalisable.  
36  
37 Furthermore, results from the PS studies are only applicable to the patients that were kept in the analyses as  
38 patients excluded from the analysis likely differ from the ones that were included in the analysis. The 1:1 matched  
39 cohorts depended on the sample size of the NOAC with the least number of patients and as a result many  
40 patients from the larger of the two NOAC groups were excluded as they could not be matched. In clinical practice,  
41 these limitations should be kept in mind when results of these studies are used to decide what NOAC should be  
42 prescribed for a certain patient. Given the small differences between efficacy and safety outcomes between  
43 NOACs, the element of patient preference should be taken into consideration,<sup>[63]</sup> as tailoring anti-coagulation  
44 treatment towards patient preferences can promote adherence to treatment.  
45  
46  
47  
48  
49  
50  
51  
52  
53  
54  
55  
56  
57  
58  
59  
60

**FIGURE LEGEND**

**Figure 1: PRISMA flowchart**

For peer review only

1  
2  
3  
4  
5  
6  
7  
8  
9  
10  
11  
12  
13  
14  
15  
16  
17  
18  
19  
20  
21  
22  
23  
24  
25  
26  
27  
28  
29  
30  
31  
32  
33  
34  
35  
36  
37  
38  
39  
40  
41  
42  
43  
44  
45  
46  
47  
48  
49  
50  
51  
52  
53  
54  
55  
56  
57  
58  
59  
60



1  
2  
3 **ACKNOWLEDGEMENTS**  
4

5 The authors would like to thank Pearl Gumbs for the initiation of this project and her input with regard to study  
6 design and interpretation of the data. Pearl Gumbs was working at Daiichi Sankyo Europe at that time.  
7  
8  
9

10  
11  
12  
13  
14  
15  
16  
17  
18  
19  
20  
21  
22  
23  
24  
25  
26  
27  
28  
29  
30  
31  
32  
33  
34  
35  
36  
37  
38  
39  
40  
41  
42  
43  
44  
45  
46  
47  
48  
49  
50  
51  
52  
53  
54  
55  
56  
57  
58  
59  
60

For peer review only

**COMPETING INTEREST**

EB reports grants from Daiichi Sankyo, during the conduct of the study; grants from Daiichi Sankyo, outside the submitted work. BvH reports grants from Daiichi Sankyo, during the conduct of the study. SH reports personal fees from Aspen, personal fees from Bayer, personal fees from BMS/Pfizer, personal fees from Daiichi-Sankyo, personal fees from Portola, outside the submitted work. GS reports personal fees from Daiichi Sankyo Europe Gmbh, outside the submitted work. AC reports personal fees from Daiichi Sankyo Europe, during the conduct of the study; grants and personal fees from Bayer AG, personal fees from Boehringer Ingelheim, grants and personal fees from Bristol-Myers Squibb, grants and personal fees from Pfizer Limited, personal fees from Portola Pharmaceuticals Inc, personal fees from Janssen, personal fees from ONO Pharmaceuticals, from AbbVie, outside the submitted work.

1  
2  
3 **AUTHORS' CONTRIBUTION**

4 EB: Conceptualization (support); Methodology (equal); Writing – Original Draft Preparation; Writing – Review &  
5 Editing (equal). BvH: Conceptualization (support); Methodology (equal); Writing – Review & Editing (equal). SH:  
6 Conceptualization (support); Writing – Review & Editing (equal). GS: Conceptualization (support), Supervision;  
7 Writing – Review & Editing (equal). ATC: Conceptualization (lead); Writing – Review & Editing (equal)  
8  
9  
10  
11  
12  
13  
14  
15  
16  
17  
18  
19  
20  
21  
22  
23  
24  
25  
26  
27  
28  
29  
30  
31  
32  
33  
34  
35  
36  
37  
38  
39  
40  
41  
42  
43  
44  
45  
46  
47  
48  
49  
50  
51  
52  
53  
54  
55  
56  
57  
58  
59  
60

For peer review only

1  
2  
3 **DATA SHARING STATEMENT**  
4

5 No new data were generated or analysed in support of this research.  
6  
7  
8  
9  
10  
11  
12  
13  
14  
15  
16  
17  
18  
19  
20  
21  
22  
23  
24  
25  
26  
27  
28  
29  
30  
31  
32  
33  
34  
35  
36  
37  
38  
39  
40  
41  
42  
43  
44  
45  
46  
47  
48  
49  
50  
51  
52  
53  
54  
55  
56  
57  
58  
59  
60

For peer review only

1  
2  
3  
4  
5  
6  
7  
8  
9  
10  
11  
12  
13  
14  
15  
16  
17  
18  
19  
20  
21  
22  
23  
24  
25  
26  
27  
28  
29  
30  
31  
32  
33  
34  
35  
36  
37  
38  
39  
40  
41  
42  
43  
44  
45  
46  
47  
48  
49  
50  
51  
52  
53  
54  
55  
56  
57  
58  
59  
60

**FUNDING**

This work was supported by Daiichi Sankyo Europe. GRANT / AWARD NUMBER: N/A

For peer review only

### PATIENT AND PUBLIC INVOLVEMENT

This research was done without patient involvement. Patients were not invited to comment on the study design and were not consulted to develop patient relevant outcomes or interpret the results. Patients were not invited to contribute to the writing or editing of this document for readability or accuracy.

For peer review only

## REFERENCES

1. Kirchhof P, Benussi S, Kotecha D, et al. 2016 ESC Guidelines for the management of atrial fibrillation developed in collaboration with EACTS. *European heart journal*. 2016;37(38):2893-962 10.1093/eurheartj/ehw210.
2. January CT, Wann LS, Calkins H, et al. 2019 AHA/ACC/HRS Focused Update of the 2014 AHA/ACC/HRS Guideline for the Management of Patients With Atrial Fibrillation: A Report of the American College of Cardiology/American Heart Association Task Force on Clinical Practice Guidelines and the Heart Rhythm Society in Collaboration With the Society of Thoracic Surgeons. *Circulation*. 2019;140(2):e125-e51 10.1161/CIR.0000000000000665.
3. Connolly SJ, Ezekowitz MD, Yusuf S, et al. Dabigatran versus warfarin in patients with atrial fibrillation. *The New England journal of medicine*. 2009;361(12):1139-51 10.1056/NEJMoa0905561.
4. Giugliano RP, Ruff CT, Braunwald E, et al. Edoxaban versus warfarin in patients with atrial fibrillation. *The New England journal of medicine*. 2013;369(22):2093-104 10.1056/NEJMoa1310907.
5. Granger CB, Alexander JH, McMurray JJ, et al. Apixaban versus warfarin in patients with atrial fibrillation. *The New England journal of medicine*. 2011;365(11):981-92 10.1056/NEJMoa1107039.
6. Patel MR, Mahaffey KW, Garg J, et al. Rivaroxaban versus warfarin in nonvalvular atrial fibrillation. *The New England journal of medicine*. 2011;365(10):883-91 10.1056/NEJMoa1009638.
7. Petri H, Urquhart J. Channeling bias in the interpretation of drug effects. *Stat Med*. 1991;10(4):577-81 10.1002/sim.4780100409.
8. Peduzzi P, Concato J, Feinstein AR, et al. Importance of events per independent variable in proportional hazards regression analysis. II. Accuracy and precision of regression estimates. *Journal of clinical epidemiology*. 1995;48(12):1503-10 10.1016/0895-4356(95)00048-8.
9. Rosenbaum PR, Rubin DB. The central role of the propensity score in observational studies for causal effects. *Biometrika*. 1983;70(1):41-55.
10. Brookhart MA, Schneeweiss S, Rothman KJ, et al. Variable selection for propensity score models. *Am J Epidemiol*. 2006;163(12):1149-56 10.1093/aje/kwj149.
11. D'Agostino RB, Jr. Propensity score methods for bias reduction in the comparison of a treatment to a non-randomized control group. *Stat Med*. 1998;17(19):2265-81 10.1002/(sici)1097-0258(19981015)17:19<2265::aid-sim918>3.0.co;2-b.
12. Austin PC, Stuart EA. The performance of inverse probability of treatment weighting and full matching on the propensity score in the presence of model misspecification when estimating the effect of treatment on survival outcomes. *Stat Methods Med Res*. 2017;26(4):1654-70 10.1177/0962280215584401.
13. Austin PC. A critical appraisal of propensity-score matching in the medical literature between 1996 and 2003. *Stat Med*. 2008;27(12):2037-49 10.1002/sim.3150.
14. Johnson ML, Crown W, Martin BC, et al. Good research practices for comparative effectiveness research: analytic methods to improve causal inference from nonrandomized studies of treatment effects using secondary data sources: the ISPOR Good Research Practices for Retrospective Database Analysis Task Force Report--Part III. *Value in health : the journal of the International Society for Pharmacoeconomics and Outcomes Research*. 2009;12(8):1062-73 10.1111/j.1524-4733.2009.00602.x.
15. Yao XI, Wang X, Speicher PJ, et al. Reporting and Guidelines in Propensity Score Analysis: A Systematic Review of Cancer and Cancer Surgical Studies. *J Natl Cancer Inst*. 2017;109(8) 10.1093/jnci/djw323.
16. Abraham NS, Noseworthy PA, Yao X, et al. Gastrointestinal Safety of Direct Oral Anticoagulants: A Large Population-Based Study. *Gastroenterology*. 2017;152(5):1014-22.e1 10.1053/j.gastro.2016.12.018.
17. Adeboyeje G, Sylwestrzak G, Barron JJ, et al. Major Bleeding Risk During Anticoagulation with Warfarin, Dabigatran, Apixaban, or Rivaroxaban in Patients with Nonvalvular Atrial Fibrillation. *Journal of managed care & specialty pharmacy*. 2017;23(9):968-78 10.18553/jmcp.2017.23.9.968.

18. Alonso A, MacLehose RF, Chen LY, et al. Prospective study of oral anticoagulants and risk of liver injury in patients with atrial fibrillation. *Heart (British Cardiac Society)*. 2017;103(11):834-9 10.1136/heartjnl-2016-310586.
19. Amin A, Keshishian A, Trocio J, et al. A Real-World Observational Study of Hospitalization and Health Care Costs Among Nonvalvular Atrial Fibrillation Patients Prescribed Oral Anticoagulants in the U.S. Medicare Population. *Journal of managed care & specialty pharmacy*. 2018;24(9):911-20 10.18553/jmcp.2018.24.9.911.
20. Amin A, Keshishian A, Vo L, et al. Real-world comparison of all-cause hospitalizations, hospitalizations due to stroke and major bleeding, and costs for non-valvular atrial fibrillation patients prescribed oral anticoagulants in a US health plan. *Journal of medical economics*. 2018;21(3):244-53 10.1080/13696998.2017.1394866.
21. Briasoulis A, Inampudi C, Akintoye E, et al. Safety and Efficacy of Novel Oral Anticoagulants Versus Warfarin in Medicare Beneficiaries With Atrial Fibrillation and Valvular Heart Disease. *Journal of the American Heart Association*. 2018;7(8) 10.1161/jaha.118.008773.
22. Charlton B, Adeboyeje G, Barron JJ, et al. Length of hospitalization and mortality for bleeding during treatment with warfarin, dabigatran, or rivaroxaban. *PLoS one*. 2018;13(3):e0193912 10.1371/journal.pone.0193912.
23. Deitelzweig S, Luo X, Gupta K, et al. Comparison of effectiveness and safety of treatment with apixaban vs. other oral anticoagulants among elderly nonvalvular atrial fibrillation patients. *Current medical research and opinion*. 2017;33(10):1745-54 10.1080/03007995.2017.1334638.
24. Graham DJ, Baro E, Zhang R, et al. Comparative Stroke, Bleeding, and Mortality Risks in Older Medicare Patients Treated with Oral Anticoagulants for Nonvalvular Atrial Fibrillation. *The American journal of medicine*. 2019 10.1016/j.amjmed.2018.12.023.
25. Graham DJ, Reichman ME, Wernecke M, et al. Stroke, Bleeding, and Mortality Risks in Elderly Medicare Beneficiaries Treated With Dabigatran or Rivaroxaban for Nonvalvular Atrial Fibrillation. *JAMA internal medicine*. 2016;176(11):1662-71 10.1001/jamainternmed.2016.5954.
26. Gupta K, Trocio J, Keshishian A, et al. Real-World Comparative Effectiveness, Safety, and Health Care Costs of Oral Anticoagulants in Nonvalvular Atrial Fibrillation Patients in the U.S. Department of Defense Population. *Journal of managed care & specialty pharmacy*. 2018;24(11):1116-27 10.18553/jmcp.2018.17488.
27. Hernandez I, Zhang Y, Saba S. Comparison of the Effectiveness and Safety of Apixaban, Dabigatran, Rivaroxaban, and Warfarin in Newly Diagnosed Atrial Fibrillation. *The American journal of cardiology*. 2017;120(10):1813-9 10.1016/j.amjcard.2017.07.092.
28. Hernandez IZY. Comparing Stroke and Bleeding with Rivaroxaban and Dabigatran in Atrial Fibrillation: Analysis of the US Medicare Part D Data. *American journal of cardiovascular drugs : drugs, devices, and other interventions*. 2017;17(1):37-47 10.1007/s40256-016-0189-9 FULL TEXT LINK <http://dx.doi.org/10.1007/s40256-016-0189-9>.
29. Lin J, Trocio J, Gupta K, et al. Major bleeding risk and healthcare economic outcomes of non-valvular atrial fibrillation patients newly-initiated with oral anticoagulant therapy in the real-world setting. *Journal of medical economics*. 2017;20(9):952-61 10.1080/13696998.2017.1341902.
30. Lip GY, Keshishian A, Kamble S, et al. Real-world comparison of major bleeding risk among non-valvular atrial fibrillation patients initiated on apixaban, dabigatran, rivaroxaban, or warfarin. A propensity score matched analysis. *Thrombosis and haemostasis*. 2016;116(5):975-86 10.1160/th16-05-0403.
31. Lip GY, Pan X, Kamble S, et al. Major bleeding risk among non-valvular atrial fibrillation patients initiated on apixaban, dabigatran, rivaroxaban or warfarin: a "real-world" observational study in the United States. *International journal of clinical practice*. 2016;70(9):752-63 10.1111/ijcp.12863.
32. Lip GYH, Keshishian A, Li X, et al. Effectiveness and Safety of Oral Anticoagulants Among Nonvalvular Atrial Fibrillation Patients. *Stroke*. 2018;49(12):2933-44 10.1161/STROKEAHA.118.020232.



- 1  
2  
3 33. Lutsey PL, Norby FL, Zakai NA, et al. Oral anticoagulation therapy and subsequent risk of  
4 venous thromboembolism in atrial fibrillation patients. *Current medical research and opinion*.  
5 2019;35(5):837-45 10.1080/03007995.2018.1541445.
- 6 34. Mentias A, Shantha G, Chaudhury P, et al. Assessment of Outcomes of Treatment With Oral  
7 Anticoagulants in Patients With Atrial Fibrillation and Multiple Chronic Conditions: A Comparative  
8 Effectiveness Analysis. *JAMA network open*. 2018;1(5):e182870  
9 10.1001/jamanetworkopen.2018.2870.
- 10 35. Norby FL, Bengtson LGS, Lutsey PL, et al. Comparative effectiveness of rivaroxaban versus  
11 warfarin or dabigatran for the treatment of patients with non-valvular atrial fibrillation. *BMC*  
12 *cardiovascular disorders*. 2017;17(1):238 10.1186/s12872-017-0672-5.
- 13 36. Noseworthy PA, Yao X, Abraham NS, et al. Direct Comparison of Dabigatran, Rivaroxaban,  
14 and Apixaban for Effectiveness and Safety in Nonvalvular Atrial Fibrillation. *Chest*. 2016;150(6):1302-  
15 12 10.1016/j.chest.2016.07.013.
- 16 37. Shantha PSG, Bhave PD, Girotra S, et al. Sex-Specific Comparative Effectiveness of Oral  
17 Anticoagulants in Elderly Patients With Newly Diagnosed Atrial Fibrillation. *Circulation Cardiovascular*  
18 *quality and outcomes*. 2017;10(4) 10.1161/circoutcomes.116.003418.
- 19 38. Tepper PG, Mardekian J, Masseria C, et al. Real-world comparison of bleeding risks among  
20 non-valvular atrial fibrillation patients prescribed apixaban, dabigatran, or rivaroxaban. *PloS one*.  
21 2018;13(11):e0205989 10.1371/journal.pone.0205989.
- 22 39. Villines TCAAPMTWEARTDOKSE. Comparative safety and effectiveness of dabigatran vs.  
23 rivaroxaban and apixaban in patients with non-valvular atrial fibrillation: A retrospective study from a  
24 large healthcare system. *Eur Heart J - Cardiovascular Pharmacotherapy*. 2019;5(2):80-90  
25 10.1093/ehjcvp/pvy044 FULL TEXT LINK <http://dx.doi.org/10.1093/ehjcvp/pvy044>.
- 26 40. Andersson NW, Svanstrom H, Lund M, et al. Comparative effectiveness and safety of  
27 apixaban, dabigatran, and rivaroxaban in patients with non-valvular atrial fibrillation. *International*  
28 *journal of cardiology*. 2018;268:113-9 10.1016/j.ijcard.2018.03.047.
- 29 41. Gorst-Rasmussen A, Lip GY, Bjerregaard Larsen T. Rivaroxaban versus warfarin and  
30 dabigatran in atrial fibrillation: comparative effectiveness and safety in Danish routine care.  
31 *Pharmacoepidemiology and drug safety*. 2016;25(11):1236-44 10.1002/pds.4034.
- 32 42. Lamberts M, Staerk L, Olesen JB, et al. Major Bleeding Complications and Persistence With  
33 Oral Anticoagulation in Non-Valvular Atrial Fibrillation: Contemporary Findings in Real-Life Danish  
34 Patients. *Journal of the American Heart Association*. 2017;6(2) 10.1161/jaha.116.004517.
- 35 43. Larsen TB, Skjoth F, Nielsen PB, et al. Comparative effectiveness and safety of non-vitamin K  
36 antagonist oral anticoagulants and warfarin in patients with atrial fibrillation: propensity weighted  
37 nationwide cohort study. *BMJ (Clinical research ed)*. 2016;353:i3189 10.1136/bmj.i3189.
- 38 44. Staerk L, Gerds TA, Lip GYH, et al. Standard and reduced doses of dabigatran, rivaroxaban  
39 and apixaban for stroke prevention in atrial fibrillation: a nationwide cohort study. *Journal of internal*  
40 *medicine*. 2018;283(1):45-55 10.1111/joim.12683.
- 41 45. Chan YH, Kuo CT, Yeh YH, et al. Thromboembolic, Bleeding, and Mortality Risks of  
42 Rivaroxaban and Dabigatran in Asians With Nonvalvular Atrial Fibrillation. *Journal of the American*  
43 *College of Cardiology*. 2016;68(13):1389-401 10.1016/j.jacc.2016.06.062.
- 44 46. Chan YH, See LC, Tu HT, et al. Efficacy and Safety of Apixaban, Dabigatran, Rivaroxaban, and  
45 Warfarin in Asians With Nonvalvular Atrial Fibrillation. *Journal of the American Heart Association*.  
46 2018;7(8) 10.1161/jaha.117.008150.
- 47 47. Lai CL, Chen HM, Liao MT, et al. Comparative Effectiveness and Safety of Dabigatran and  
48 Rivaroxaban in Atrial Fibrillation Patients. *Journal of the American Heart Association*. 2017;6(4)  
49 10.1161/jaha.116.005362.
- 50 48. Meng SW, Lin TT, Liao MT, et al. Direct Comparison of Low-Dose Dabigatran and Rivaroxaban  
51 for Effectiveness and Safety in Patients with Non-Valvular Atrial Fibrillation. *Acta Cardiologica Sinica*.  
52 2019;35(1):42-54 10.6515/acs.201901\_35(1).20180817a.
- 53  
54  
55  
56  
57  
58  
59  
60

- 1  
2  
3 49. Blin PD-PCCYBJMPAALRDCMN. Comparative Effectiveness and Safety of Standard or Reduced  
4 Dose Dabigatran vs. Rivaroxaban in Nonvalvular Atrial Fibrillation. *Clin Pharm Therapeutics*.  
5 2019;105(6):1439-55 10.1002/cpt.1318 FULL TEXT LINK <http://dx.doi.org/10.1002/cpt.1318>.  
6  
7 50. Al-Khalili F, Lindstrom C, Benson L. The safety and persistence of non-vitamin-K-antagonist  
8 oral anticoagulants in atrial fibrillation patients treated in a well structured atrial fibrillation clinic.  
9 *Current medical research and opinion*. 2016;32(4):779-85 10.1185/03007995.2016.1142432.  
10  
11 51. Mueller T, Alvarez-Madrado S, Robertson C, et al. Comparative safety and effectiveness of  
12 direct oral anticoagulants in patients with atrial fibrillation in clinical practice in Scotland. *British*  
13 *journal of clinical pharmacology*. 2019;85(2):422-31 10.1111/bcp.13814.  
14  
15 52. Vinogradova Y, Coupland C, Hill T, et al. Risks and benefits of direct oral anticoagulants versus  
16 warfarin in a real world setting: cohort study in primary care. *BMJ (Clinical research ed)*.  
17 2018;362:k2505 10.1136/bmj.k2505.  
18  
19 53. Cerda M, Cerezo-Manchado JJ, Johansson E, et al. Facing real-life with direct oral  
20 anticoagulants in patients with nonvalvular atrial fibrillation: outcomes from the first observational  
21 and prospective study in a Spanish population. *Journal of comparative effectiveness research*.  
22 2019;8(3):165-78 10.2217/cer-2018-0134.  
23  
24 54. Li WH, Huang D, Chiang CE, et al. Efficacy and safety of dabigatran, rivaroxaban, and warfarin  
25 for stroke prevention in Chinese patients with atrial fibrillation: the Hong Kong Atrial Fibrillation  
26 Project. *Clinical cardiology*. 2017;40(4):222-9 10.1002/clc.22649.  
27  
28 55. <https://clincalc.com/stats/samplesize.aspx> [  
29  
30 56. D.E. H, K. I, G. K, et al. Matching as nonparametric preprocessing for reducing model  
31 dependence in parametric causal inference. *Political Analysis*. 2007;15:199-236.  
32  
33 57. Greenland S, Pearl J, Robins JM. Causal diagrams for epidemiologic research. *Epidemiology*.  
34 1999;10(1):37-48.  
35  
36 58. Bohula EA, Giugliano RP, Ruff CT, et al. Impact of Renal Function on Outcomes With  
37 Edoxaban in the ENGAGE AF-TIMI 48 Trial. *Circulation*. 2016;134(1):24-36  
38 10.1161/circulationaha.116.022361.  
39  
40 59. Austin PC, Stuart EA. Estimating the effect of treatment on binary outcomes using full  
41 matching on the propensity score. *Stat Methods Med Res*. 2017;26(6):2505-25  
42 10.1177/0962280215601134.  
43  
44 60. Zhu J, Alexander GC, Nazarian S, et al. Trends and Variation in Oral Anticoagulant Choice in  
45 Patients with Atrial Fibrillation, 2010-2017. *Pharmacotherapy*. 2018;38(9):907-20  
46 10.1002/phar.2158.  
47  
48 61. Loo SY, Dell'Aniello S, Huiart L, et al. Trends in the prescription of novel oral anticoagulants in  
49 UK primary care. *British journal of clinical pharmacology*. 2017;83(9):2096-106 10.1111/bcp.13299.  
50  
51 62. Haastrup SB, Hellfritzsch M, Rasmussen L, et al. Use of Non-Vitamin K Antagonist Oral  
52 Anticoagulants 2008-2016: A Danish Nationwide Cohort Study. *Basic & clinical pharmacology &*  
53 *toxicology*. 2018;123(4):452-63 10.1111/bcpt.13024.  
54  
55 63. Vaanholt MCW, Weernink MGM, von Birgelen C, et al. Perceived advantages and  
56 disadvantages of oral anticoagulants, and the trade-offs patients make in choosing anticoagulant  
57 therapy and adhering to their drug regimen. *Patient Educ Couns*. 2018;101(11):1982-9  
58 10.1016/j.pec.2018.06.019.  
59  
60

1  
2  
3  
4  
5  
6  
7  
8  
9  
10  
11  
12  
13  
14  
15  
16  
17  
18  
19  
20  
21  
22  
23  
24  
25  
26  
27  
28  
29  
30  
31  
32  
33  
34  
35  
36  
37  
38  
39  
40  
41  
42  
43  
44  
45  
46  
47  
48  
49  
50  
51  
52  
53  
54  
55  
56  
57  
58  
59  
60

For peer review only

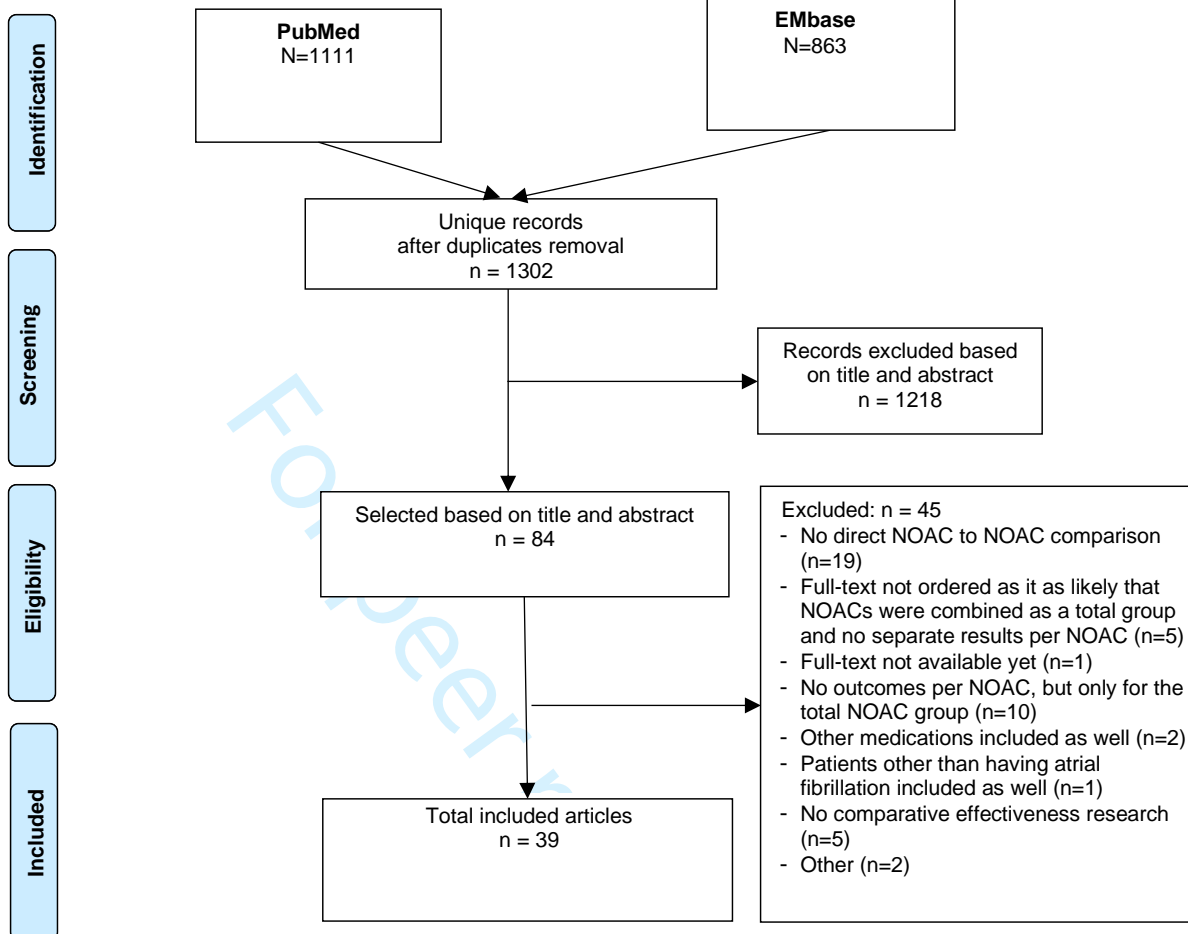

The following search string was used for PubMed, and adapted for Cochrane and EMBase.

**#1. NOAC**

direct oral anticoagulant\*[tiab] OR direct oral anti-coagulant\*[tiab] OR direct oral anticoagulation[tiab] OR direct oral anti-coagulation[tiab] OR direct-acting oral anticoagulant\*[tiab] OR direct-acting oral anti-coagulant\*[tiab] OR direct-acting oral anticoagulation[tiab] OR direct-acting oral anti-coagulation[tiab] OR DOAC[tiab] OR novel oral anticoagulant\*[tiab] OR novel oral anti-coagulant\*[tiab] OR Novel oral anticoagulation[tiab] OR Novel oral anti-coagulation[tiab] OR NOAC[tiab] OR Rivaroxaban[tiab] OR Apixaban[tiab] OR Edoxaban[tiab] OR Dabigatran[tiab] OR "Non VKA Oral Anticoagulant"[tiab] OR "Non Vitamin K Antagonist Oral Anticoagulant"[tiab]

**#2. Comparative effectiveness studies**

comparative effectiveness research[mesh] OR comparative effectiveness[tiab] OR real-world[tiab] OR real-life[tiab] OR cohort studies[mesh] OR cohort[tiab]

**#3. Atrial fibrillation**

atrial fibrillation[tiab]

**Limits:**

Language: English

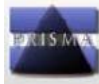

# PRISMA 2009 Checklist

| Section/topic                      | #  | Checklist item                                                                                                                                                                                                                                                                                              | Reported on page # |
|------------------------------------|----|-------------------------------------------------------------------------------------------------------------------------------------------------------------------------------------------------------------------------------------------------------------------------------------------------------------|--------------------|
| <b>TITLE</b>                       |    |                                                                                                                                                                                                                                                                                                             |                    |
| Title                              | 1  | Identify the report as a systematic review, meta-analysis, or both.                                                                                                                                                                                                                                         | 1                  |
| <b>ABSTRACT</b>                    |    |                                                                                                                                                                                                                                                                                                             |                    |
| Structured summary                 | 2  | Provide a structured summary including, as applicable: background; objectives; data sources; study eligibility criteria, participants, and interventions; study appraisal and synthesis methods; results; limitations; conclusions and implications of key findings; systematic review registration number. | 2                  |
| <b>INTRODUCTION</b>                |    |                                                                                                                                                                                                                                                                                                             |                    |
| Rationale                          | 3  | Describe the rationale for the review in the context of what is already known.                                                                                                                                                                                                                              | 3,4                |
| Objectives                         | 4  | Provide an explicit statement of questions being addressed with reference to participants, interventions, comparisons, outcomes, and study design (PICOS).                                                                                                                                                  | 4                  |
| <b>METHODS</b>                     |    |                                                                                                                                                                                                                                                                                                             |                    |
| Protocol and registration          | 5  | Indicate if a review protocol exists, if and where it can be accessed (e.g., Web address), and, if available, provide registration information including registration number.                                                                                                                               | NA                 |
| Eligibility criteria               | 6  | Specify study characteristics (e.g., PICOS, length of follow-up) and report characteristics (e.g., years considered, language, publication status) used as criteria for eligibility, giving rationale.                                                                                                      | 5,6                |
| Information sources                | 7  | Describe all information sources (e.g., databases with dates of coverage, contact with study authors to identify additional studies) in the search and date last searched.                                                                                                                                  | 5,6                |
| Search                             | 8  | Present full electronic search strategy for at least one database, including any limits used, such that it could be repeated.                                                                                                                                                                               | S1_Table           |
| Study selection                    | 9  | State the process for selecting studies (i.e., screening, eligibility, included in systematic review, and, if applicable, included in the meta-analysis).                                                                                                                                                   | 5                  |
| Data collection process            | 10 | Describe method of data extraction from reports (e.g., piloted forms, independently, in duplicate) and any processes for obtaining and confirming data from investigators.                                                                                                                                  | 5                  |
| Data items                         | 11 | List and define all variables for which data were sought (e.g., PICOS, funding sources) and any assumptions and simplifications made.                                                                                                                                                                       | 5                  |
| Risk of bias in individual studies | 12 | Describe methods used for assessing risk of bias of individual studies (including specification of whether this was done at the study or outcome level), and how this information is to be used in any data synthesis.                                                                                      | 5,6                |
| Summary measures                   | 13 | State the principal summary measures (e.g., risk ratio, difference in means).                                                                                                                                                                                                                               | NA                 |
| Synthesis of results               | 14 | Describe the methods of handling data and combining results of studies, if done, including measures of consistency (e.g., I <sup>2</sup> ) for each meta-analysis.                                                                                                                                          | NA                 |

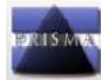

# PRISMA 2009 Checklist

Page 1 of 2

| Section/topic                 | #  | Checklist item                                                                                                                                                                                           | Reported on page # |
|-------------------------------|----|----------------------------------------------------------------------------------------------------------------------------------------------------------------------------------------------------------|--------------------|
| Risk of bias across studies   | 15 | Specify any assessment of risk of bias that may affect the cumulative evidence (e.g., publication bias, selective reporting within studies).                                                             | NA                 |
| Additional analyses           | 16 | Describe methods of additional analyses (e.g., sensitivity or subgroup analyses, meta-regression), if done, indicating which were pre-specified.                                                         | NA                 |
| <b>RESULTS</b>                |    |                                                                                                                                                                                                          |                    |
| Study selection               | 17 | Give numbers of studies screened, assessed for eligibility, and included in the review, with reasons for exclusions at each stage, ideally with a flow diagram.                                          | S2_Fig             |
| Study characteristics         | 18 | For each study, present characteristics for which data were extracted (e.g., study size, PICOS, follow-up period) and provide the citations.                                                             | 8-21               |
| Risk of bias within studies   | 19 | Present data on risk of bias of each study and, if available, any outcome level assessment (see item 12).                                                                                                | 8-27               |
| Results of individual studies | 20 | For all outcomes considered (benefits or harms), present, for each study: (a) simple summary data for each intervention group (b) effect estimates and confidence intervals, ideally with a forest plot. | NA                 |
| Synthesis of results          | 21 | Present results of each meta-analysis done, including confidence intervals and measures of consistency.                                                                                                  | NA                 |
| Risk of bias across studies   | 22 | Present results of any assessment of risk of bias across studies (see Item 15).                                                                                                                          | NA                 |
| Additional analysis           | 23 | Give results of additional analyses, if done (e.g., sensitivity or subgroup analyses, meta-regression [see Item 16]).                                                                                    | NA                 |
| <b>DISCUSSION</b>             |    |                                                                                                                                                                                                          |                    |
| Summary of evidence           | 24 | Summarize the main findings including the strength of evidence for each main outcome; consider their relevance to key groups (e.g., healthcare providers, users, and policy makers).                     | 30                 |
| Limitations                   | 25 | Discuss limitations at study and outcome level (e.g., risk of bias), and at review-level (e.g., incomplete retrieval of identified research, reporting bias).                                            | 30,31              |
| Conclusions                   | 26 | Provide a general interpretation of the results in the context of other evidence, and implications for future research.                                                                                  | 31,32              |
| <b>FUNDING</b>                |    |                                                                                                                                                                                                          |                    |
| Funding                       | 27 | Describe sources of funding for the systematic review and other support (e.g., supply of data); role of funders for the systematic review.                                                               |                    |

From: Moher D, Liberati A, Tetzlaff J, Altman DG, The PRISMA Group (2009). Preferred Reporting Items for Systematic Reviews and Meta-Analyses: The PRISMA Statement. PLoS Med 6(7): e1000097. doi:10.1371/journal.pmed1000097

For more information, visit: [www.prisma-statement.org](http://www.prisma-statement.org).

Page 2 of 2

For peer review only - <http://bmjopen.bmj.com/site/about/guidelines.xhtml>
