# Supplementary material for: Critical appraisal and issues regarding generalisability of comparative effectiveness studies of NOACs in atrial fibrillation and their relation to clinical trial data: a systematic review
Source: PubMed Central journal article supplement — BMJ Open. 2021 Feb 1;11(2):e042024. doi: 10.1136/bmjopen-2020-042024 (PMC7852966; doi:10.1136/bmjopen-2020-042024), 2021-02-01
Supplement: bmjopen-2020-042024supp001.pdf [file bmjopen-2020-042024supp001.pdf]

The following search string was used for PubMed, and adapted for Cochrane and EMBase.

|                                                                                                                                                                                                                                                                                                                                                                                                                                                                                                                                                                                                                                                                                                           |
|-----------------------------------------------------------------------------------------------------------------------------------------------------------------------------------------------------------------------------------------------------------------------------------------------------------------------------------------------------------------------------------------------------------------------------------------------------------------------------------------------------------------------------------------------------------------------------------------------------------------------------------------------------------------------------------------------------------|
| <b>#1. NOAC</b><br>direct oral anticoagulant*[tiab] OR direct oral anti-coagulant*[tiab] OR direct oral anticoagulation[tiab] OR direct oral anti-coagulation[tiab] OR direct-acting oral anticoagulant*[tiab] OR direct-acting oral anti-coagulant*[tiab] OR direct-acting oral anticoagulation[tiab] OR direct-acting oral anti-coagulation[tiab] OR DOAC[tiab] OR novel oral anticoagulant*[tiab] OR novel oral anti-coagulant*[tiab] OR Novel oral anticoagulation[tiab] OR Novel oral anti-coagulation[tiab] OR NOAC[tiab] OR Rivaroxaban[tiab] OR Apixaban[tiab] OR Edoxaban[tiab] OR Dabigatran[tiab] OR "Non VKA Oral Anticoagulant"[tiab] OR "Non Vitamin K Antagonist Oral Anticoagulant"[tiab] |
| <b>#2. Comparative effectiveness studies</b><br>comparative effectiveness research[mesh] OR comparative effectiveness[tiab] OR real-world[tiab] OR real-life[tiab] OR cohort studies[mesh] OR cohort[tiab]                                                                                                                                                                                                                                                                                                                                                                                                                                                                                                |
| <b>#3. Atrial fibrillation</b><br>atrial fibrillation[tiab]                                                                                                                                                                                                                                                                                                                                                                                                                                                                                                                                                                                                                                               |
| <b>Limits:</b><br>Language: English                                                                                                                                                                                                                                                                                                                                                                                                                                                                                                                                                                                                                                                                       |
